# Supplementary material
Source: PubMed Central journal article supplement (PMC2651004)
Supplement: NIHMS86453-supplement-1_si_001.pdf [file NIHMS86453-supplement-1_si_001.pdf]

# Discovery of Ligands for a Novel Target, the Human Telomerase RNA, Based on Flexible-Target Virtual Screening and NMR

Irene Gomez Pinto, Christophe Guilbert, Nikolai B. Ulyanov. Jay Stearns and Thomas L. James

## Supplemental material

Table of contents:

|                                   |          |
|-----------------------------------|----------|
| 1) Mass spectroscopy purity table | Page S2  |
| 2) 1D NMR traces                  | Page S4  |
| 3) Mass spectroscopy              | Page S15 |
| 3.1 LC-MS/MS protocols            | Page S15 |
| 3.2 LC-MS/MS data                 | Page S15 |

## 1) Mass spectroscopy purity table

| Structure # | Zinc Number | LC/MS MH+ Calc. | LC/MS MH+ Found |
|-------------|-------------|-----------------|-----------------|
| 1           | 3830842     | 415             | 415             |
| 2           | 3831167     | 310             | 310             |
| 3           | 1681039     | 281             | 281             |
| 4           | 1728888     | 305             | 305             |
| 5           | 1659950     | 363             | 363             |
| 6           | 1755302     | 364             | 364             |
| 7           | 1755784     | 319             | 319             |
| 8           | 3831302     | 214             | 214             |
| 9           | 1578896     | 186             | 186             |
| 10          | 1736291     | 350             | 350             |
| 11          | 1530657     | 375             | 375             |
| 12          | 28449       | 215             | 215             |
| 13          | 57106       | 228             | 228             |
| 14          | 484         | 331             | 331             |
| 15          | 57320       | 304             | 304             |
| 16          | 3872807     | 421             | 421             |
| 17          | 1766827     | 548             | 274*            |
| 18          | 3830747     | 481             | 481             |
| 19          | 1666894     | 370             | 370             |
| 20          | 1653191     | 370             | 370             |
| 21          | 1729641     | 352             | 352             |
| 22          | 1755462     | 379             | 379             |
| 23          | 1621260     | 356             | 356             |
| 24          | 1724568     | 370             | 370             |
| 25          | 1704090     | 504             | 252*            |
| 26          | 1631690     | 425             | 425             |
| 27          | 1695616     | 285             | 285             |
| 28          | 1596778     | 370             | 370             |
| 29          | 1641916     | 347             | 347             |
| 30          | 1692893     | 507             | 507             |
| 31          | 608154      | 412             | 412             |
| 32          | 3830916     | 357             | 357             |
| 33          | 1665554     | 395             | 395             |
| 34          | 1684589     | 482             | 482             |
| 35          | 1678484     | 481             | 481             |
| 36          | 4707118     | 526             | 526             |
| 37          | 538503      | 408             | 408             |
| 38          | 3831528     | 447             | 447             |
| 39          | 5010740     | 384             | 384             |
| 40          | 5386677     | 330             | 330             |
| 41          | 5439641     | 600             | 600             |

|    |         |     |       |
|----|---------|-----|-------|
| 42 | 5496932 | 614 | 614   |
| 43 | 3954210 | 596 | 596   |
| 44 | 4198846 | 652 | 326*  |
| 45 | 1601558 | 297 | 297   |
| 46 | 1530748 | 384 | 384   |
| 47 | 1655587 | 319 | 319   |
| 48 | 1566281 | 293 | 293   |
| 49 | 509     | 266 | 266   |
| 50 | 3831586 | 295 | 295   |
| 51 | 27696   | 319 | 319   |
| 52 | 1678385 | 366 | 366   |
| 53 | 1137    | 316 | 316   |
| 54 | 1701768 | 240 | 223** |
| 55 | 57146   | 255 | 255   |

\* Double charge – 2 quaternary nitrogens.

\*\* MH<sup>+</sup> with loss of water.

No validated assays were used. All compounds were greater than 95% purity as estimated by LC-MS and NMR

## 2) 1D NMR traces

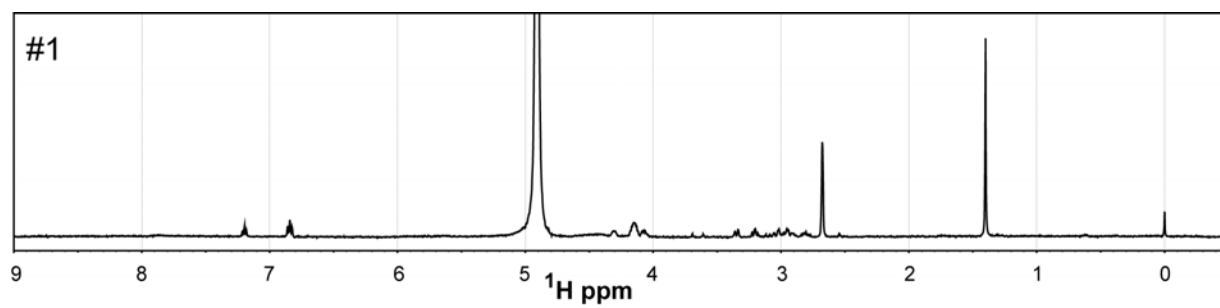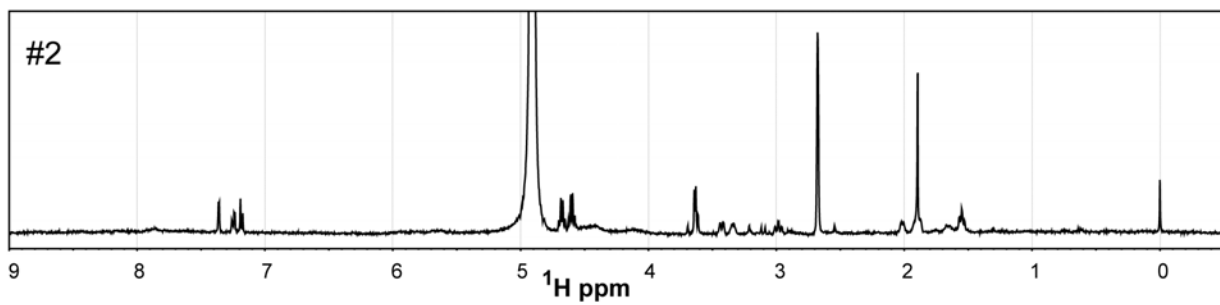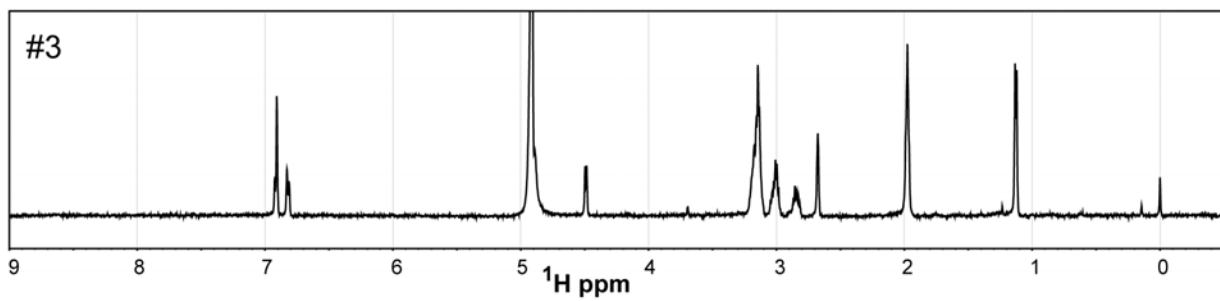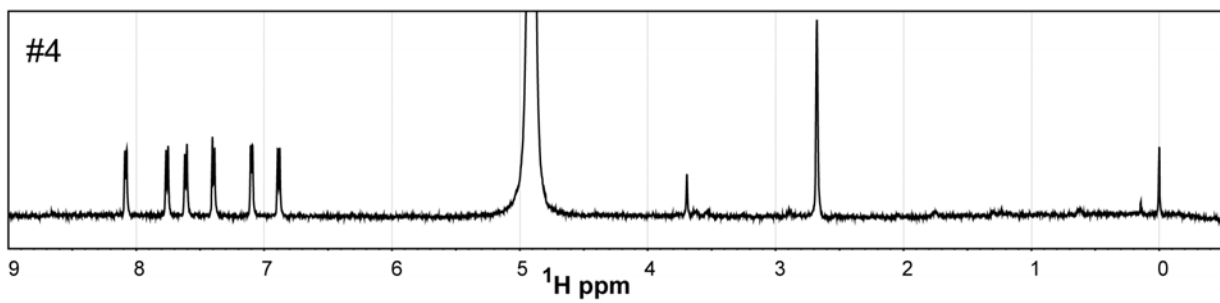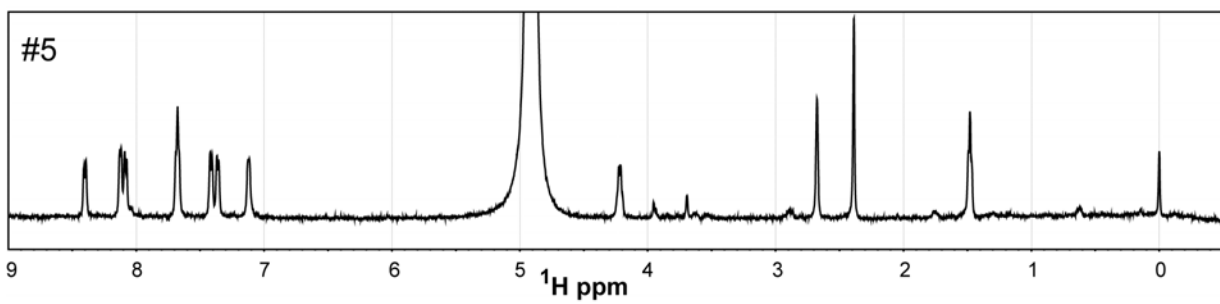

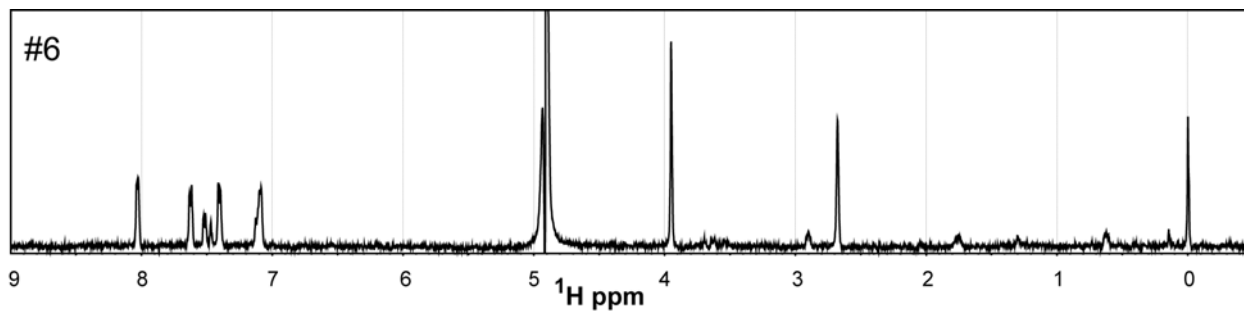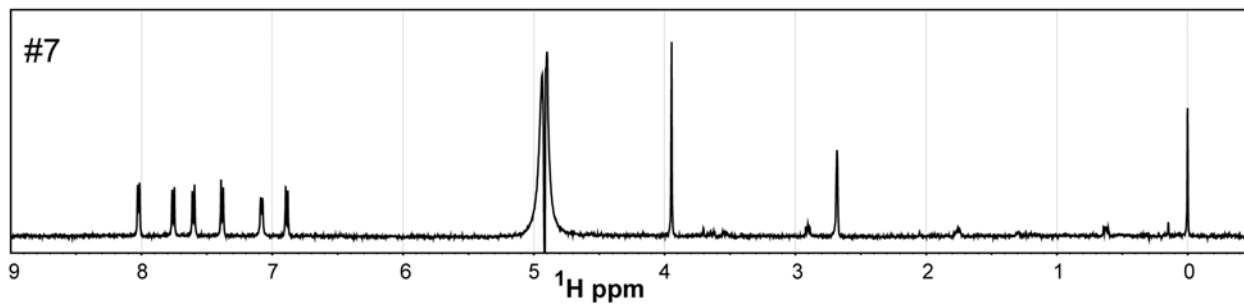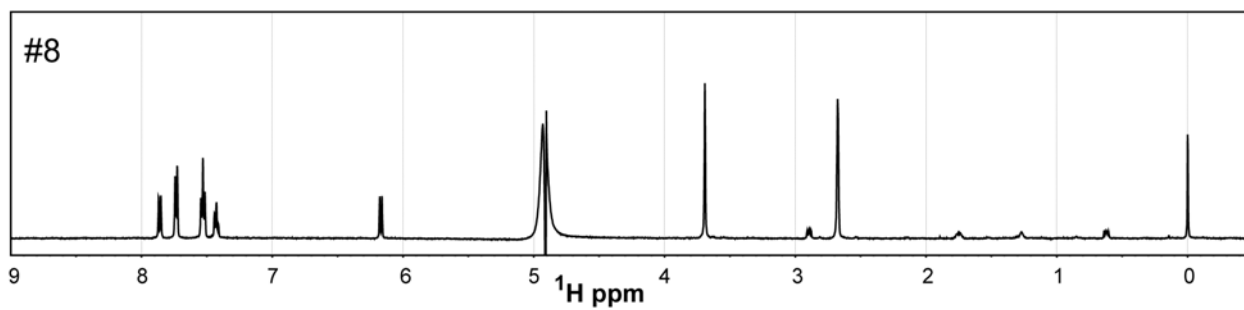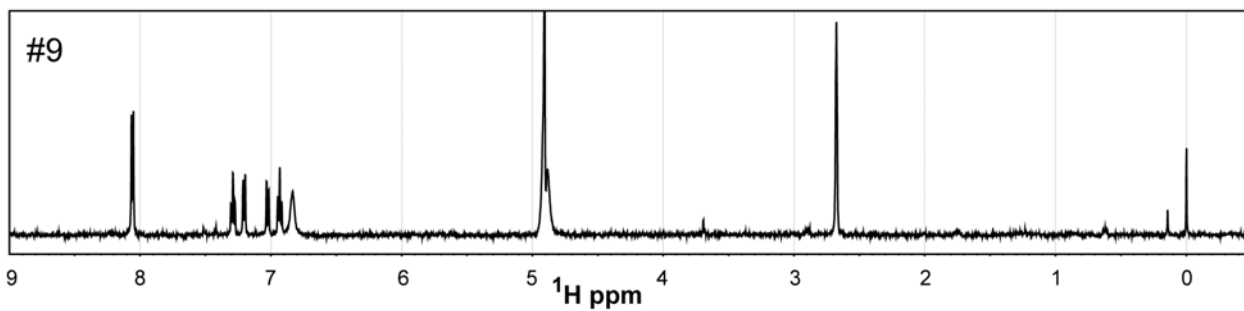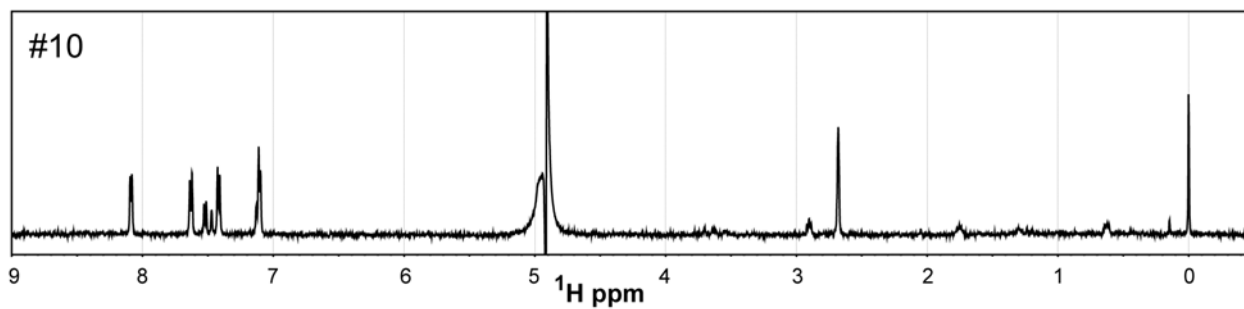

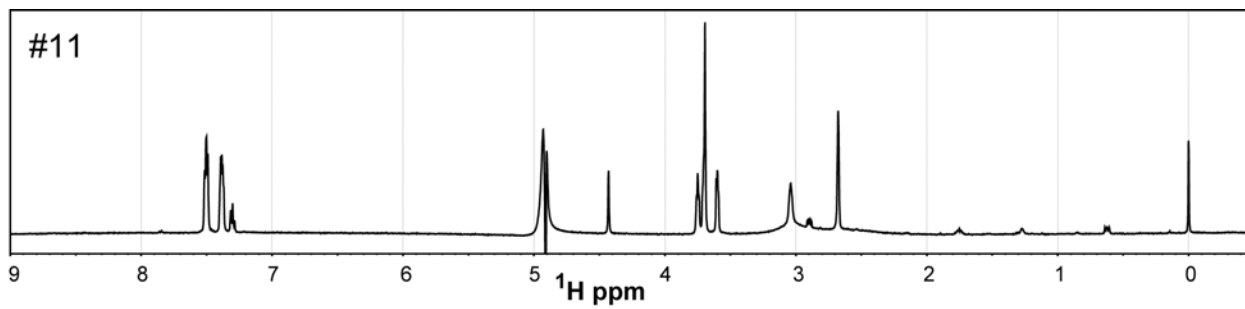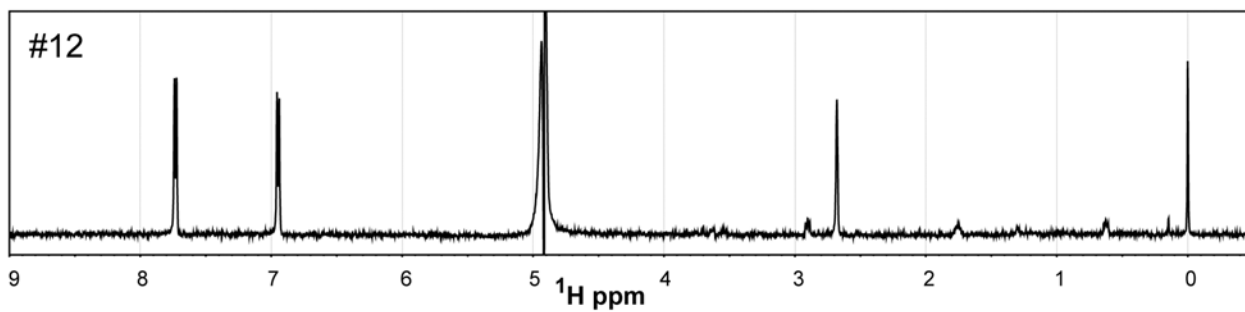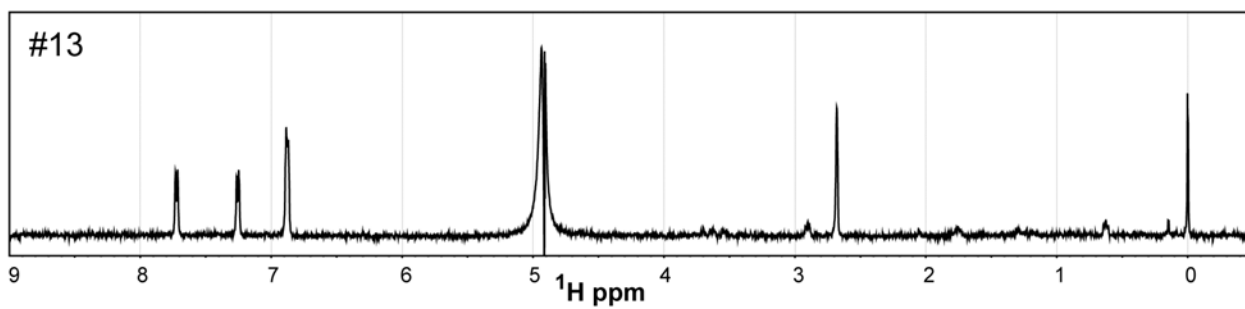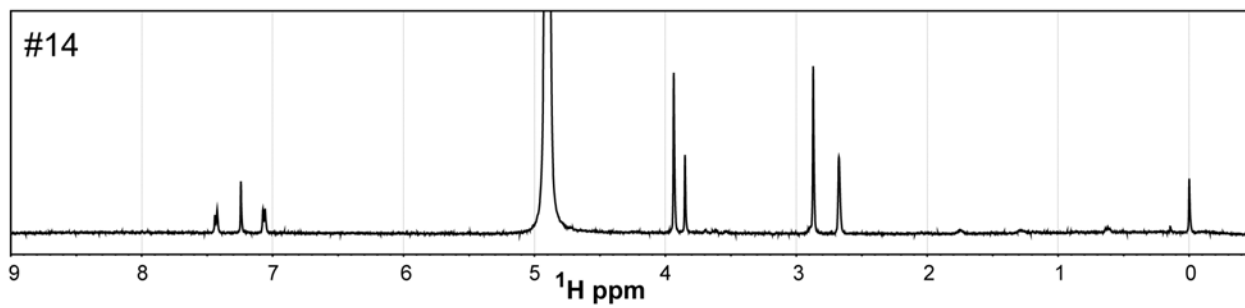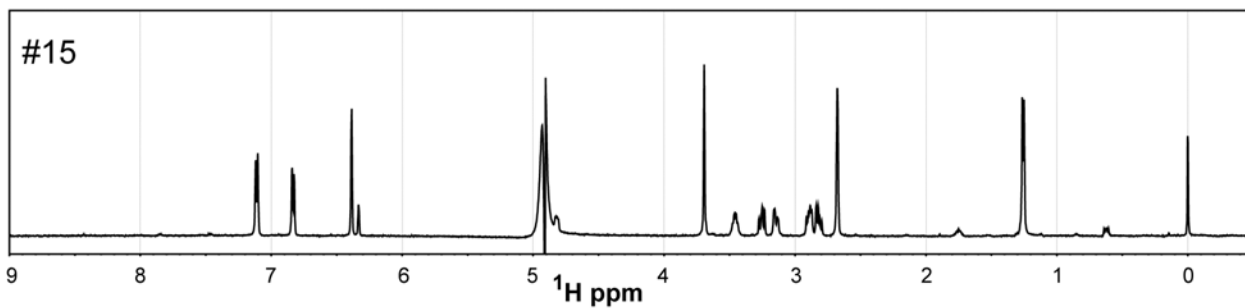

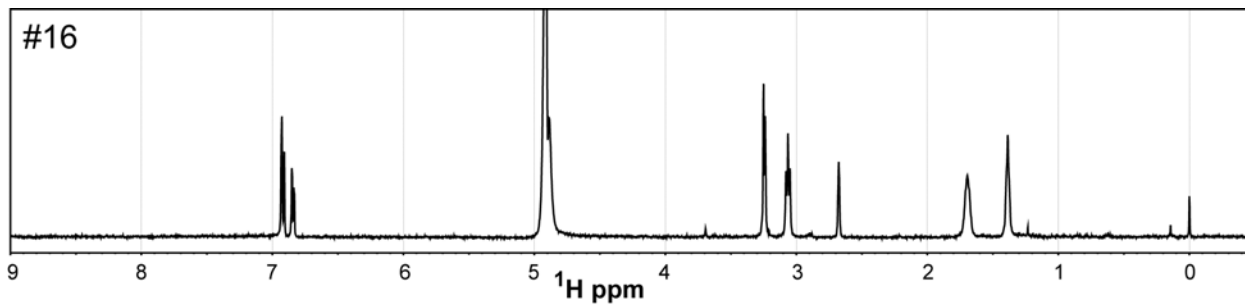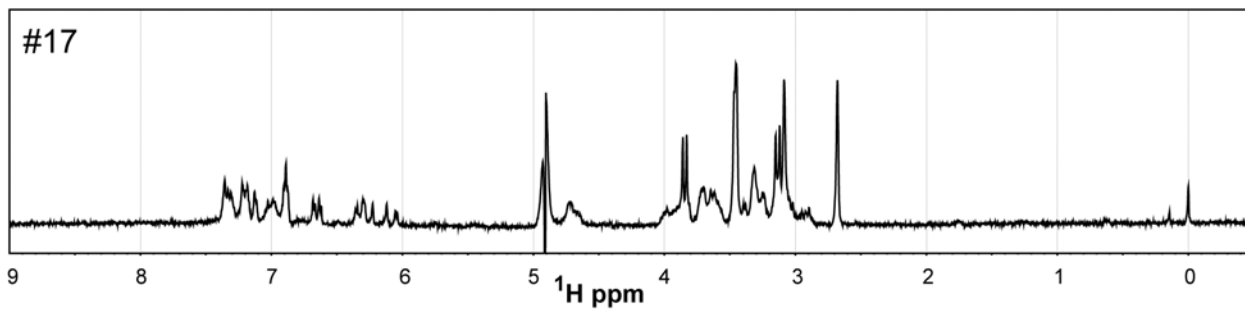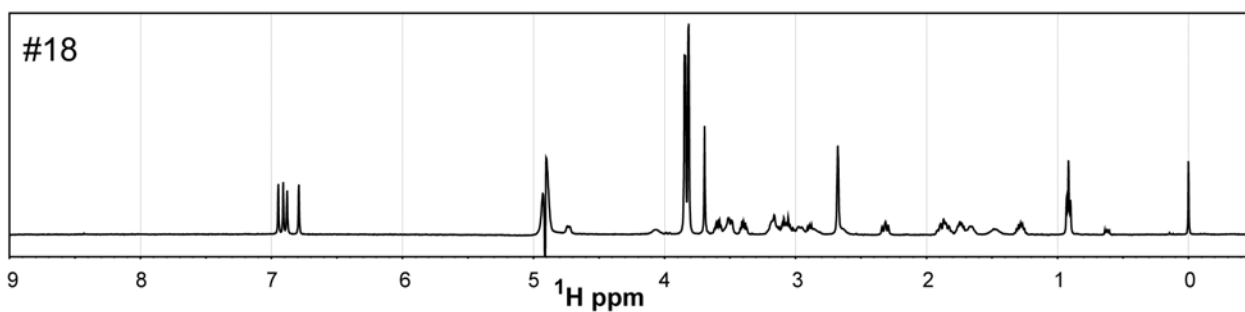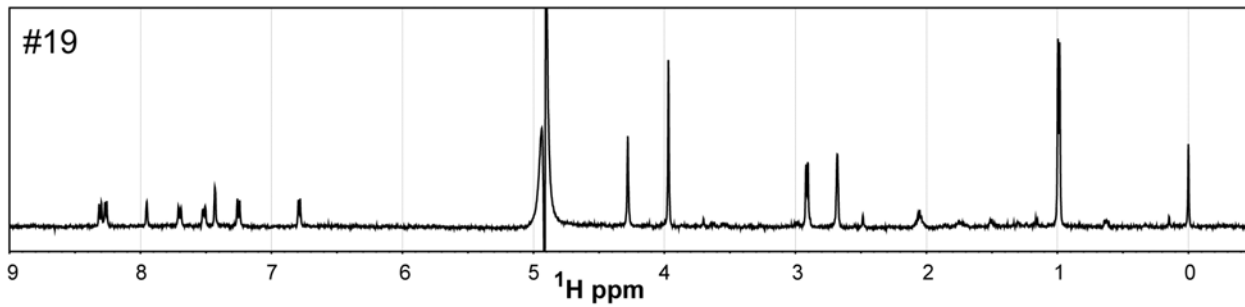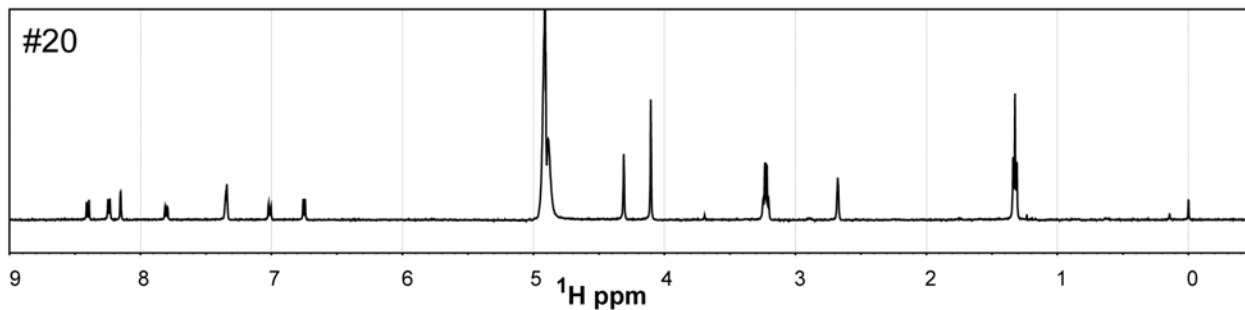

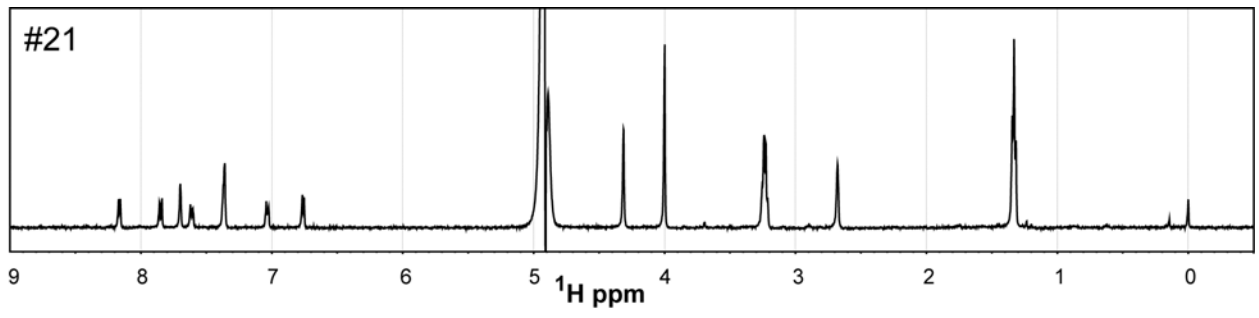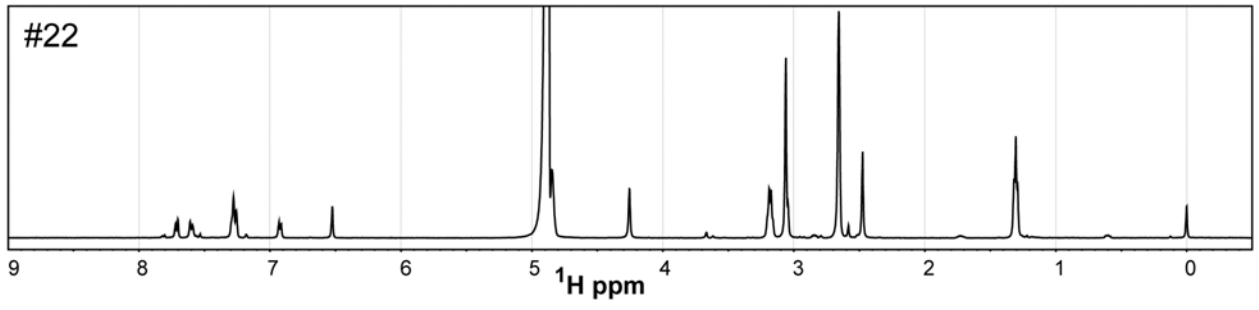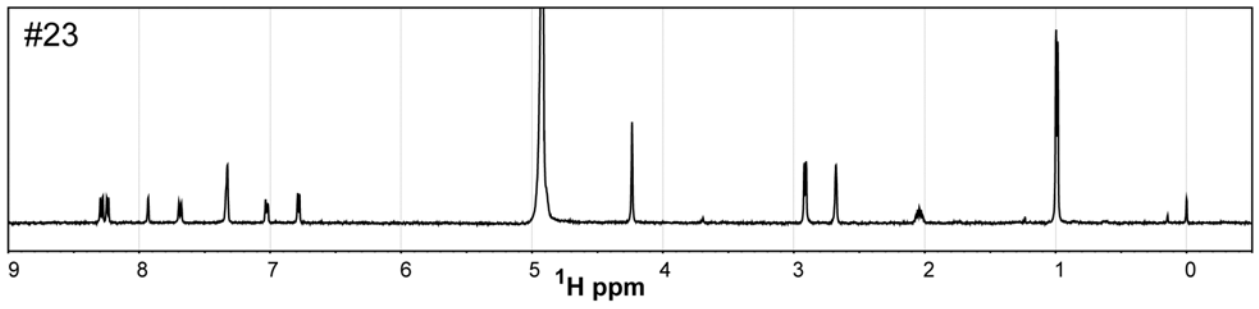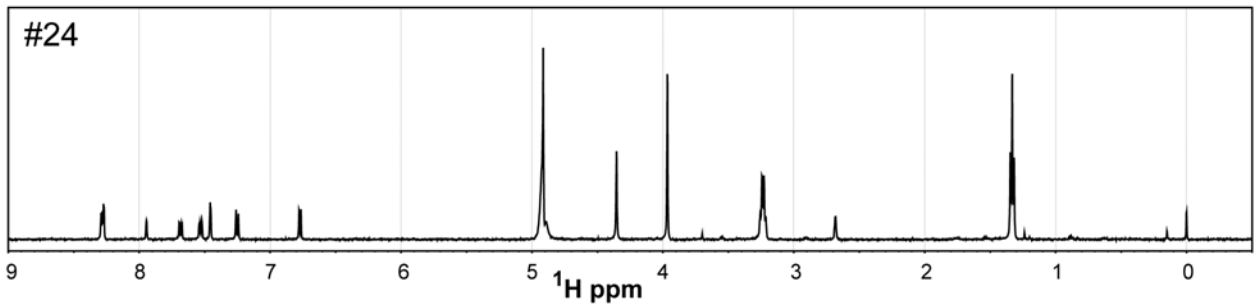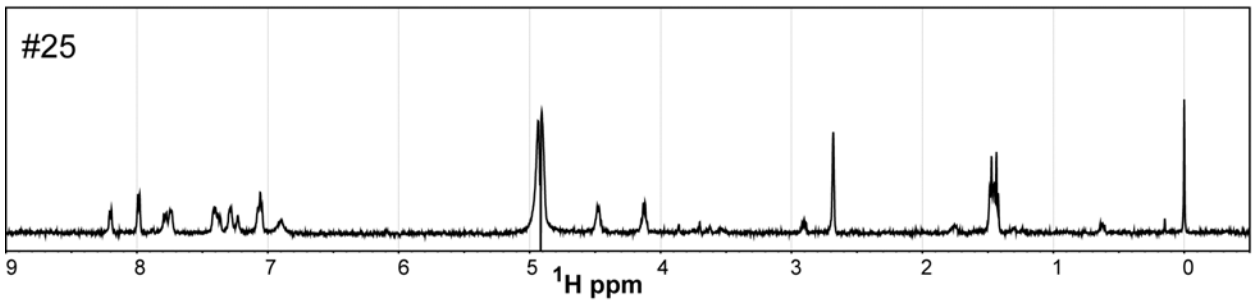



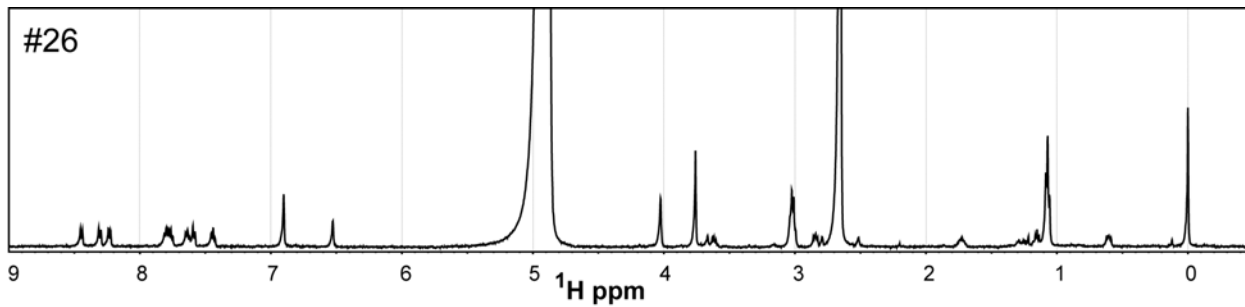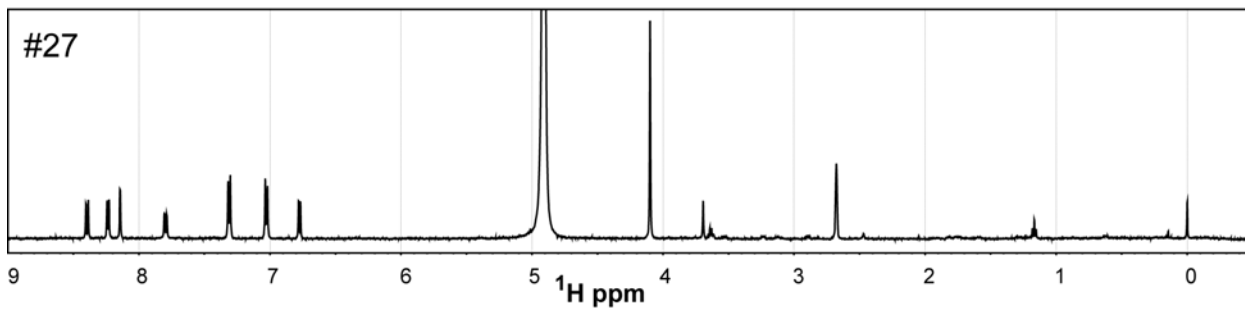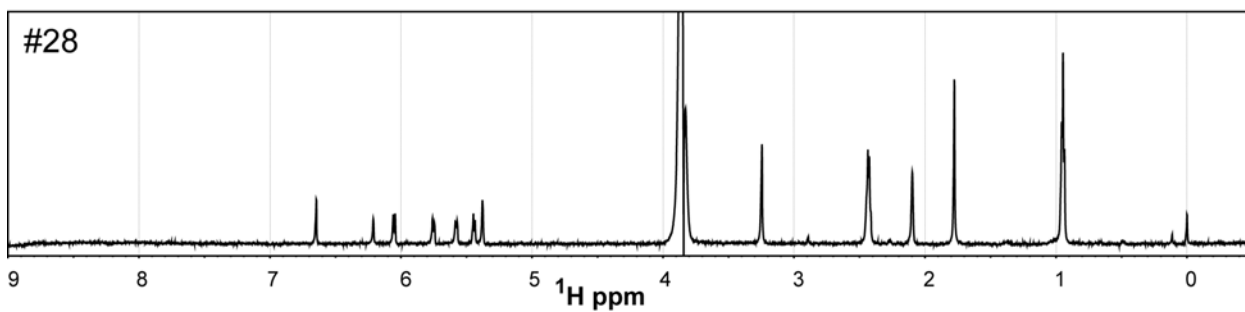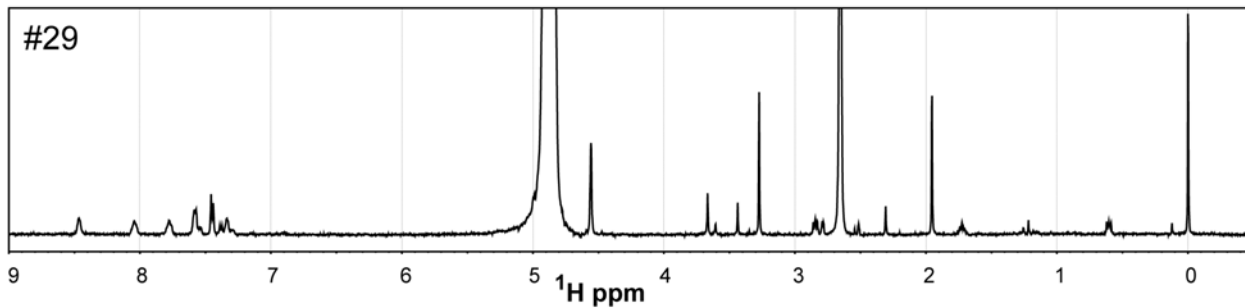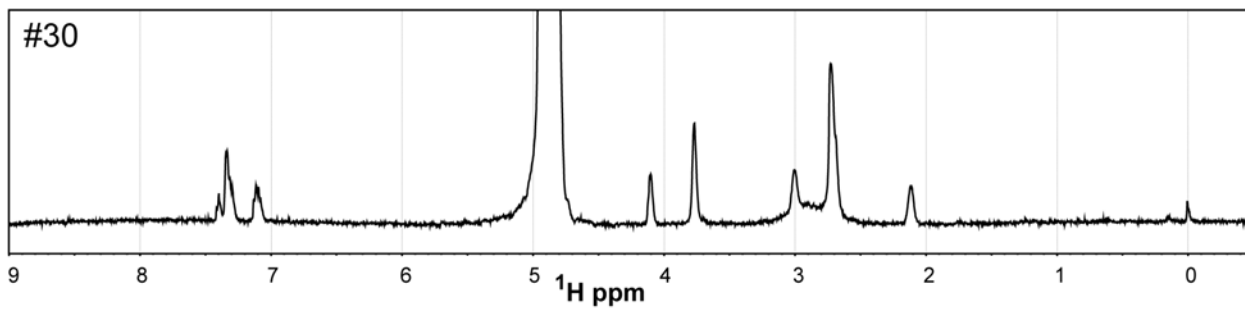

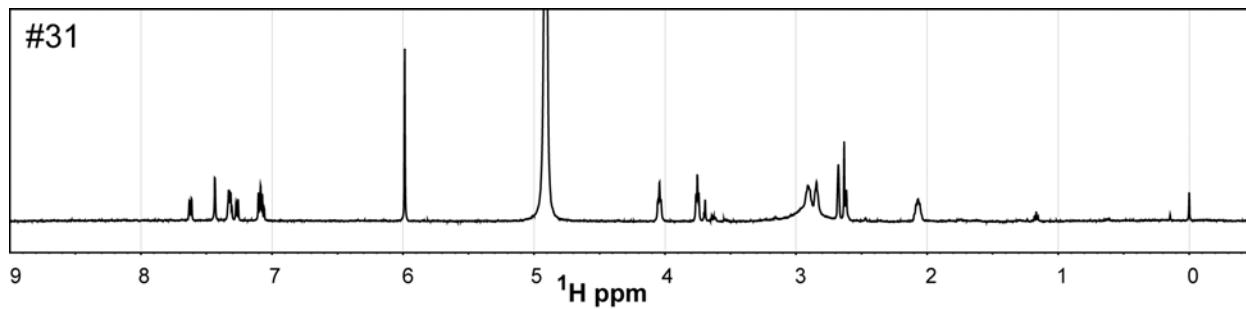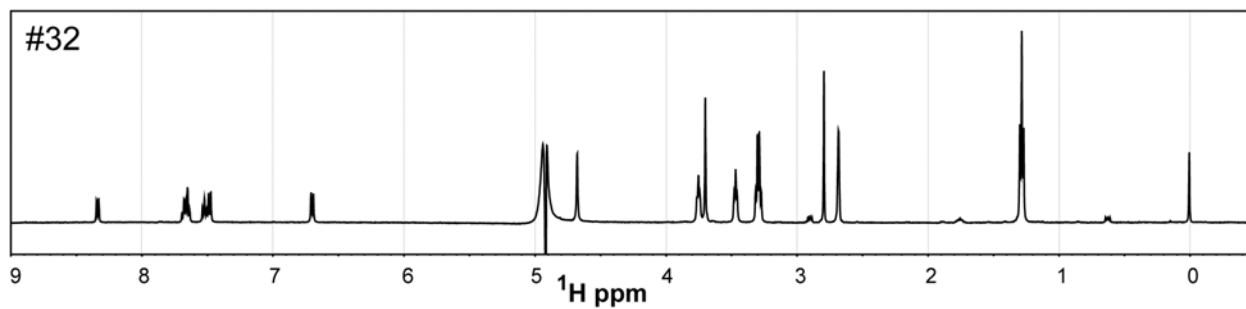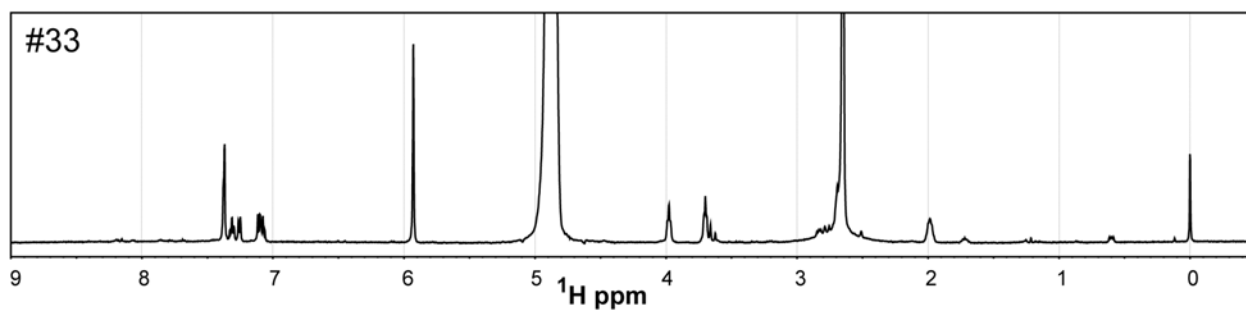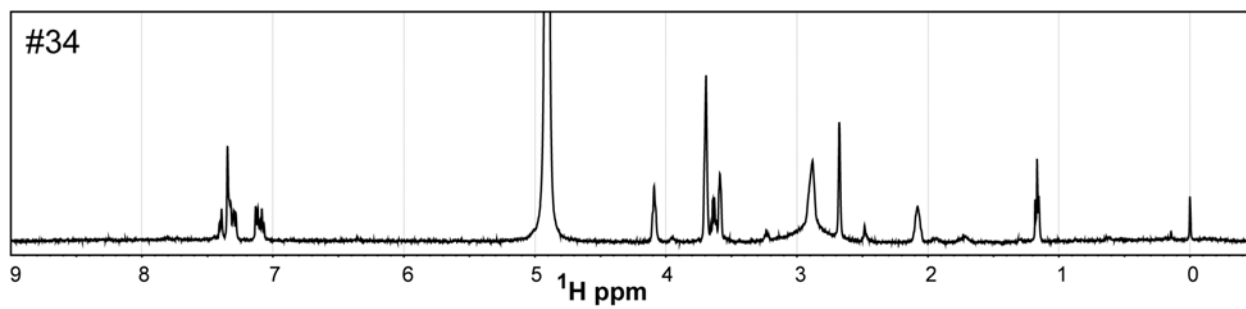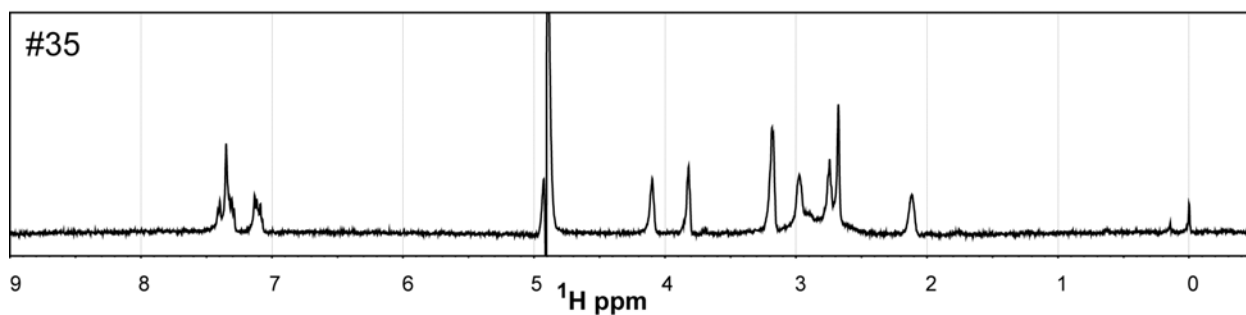

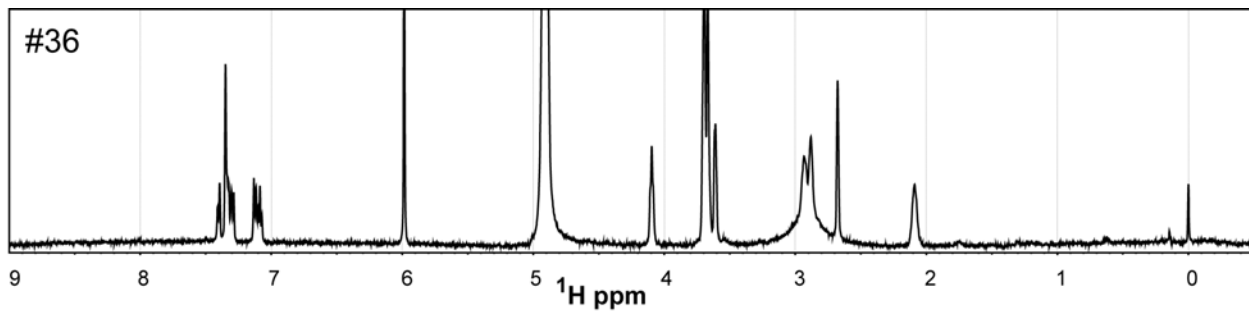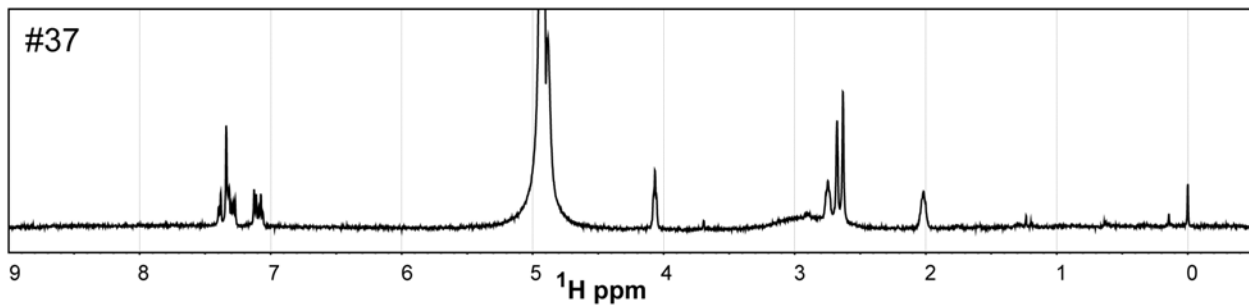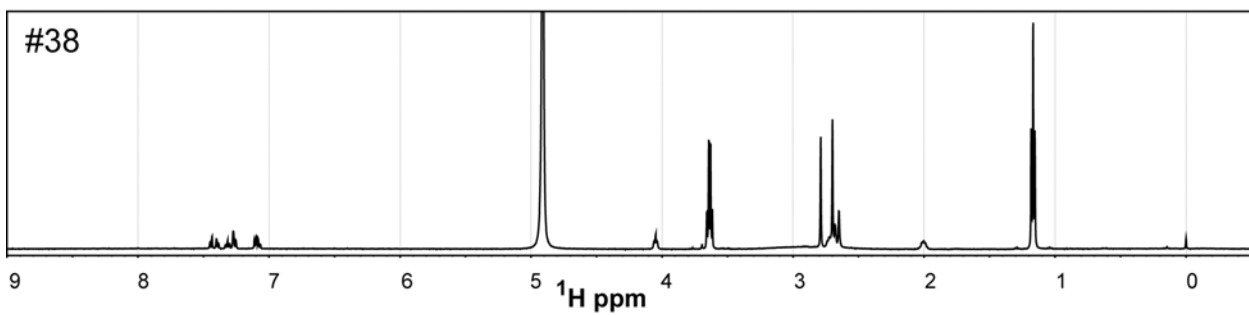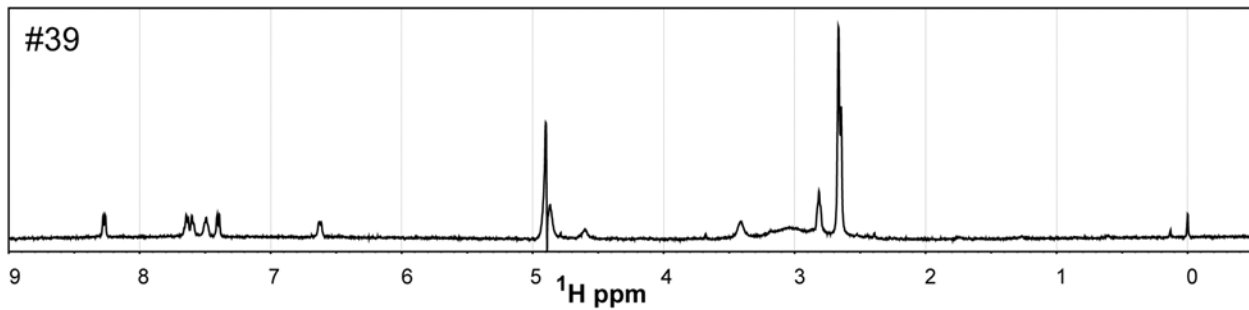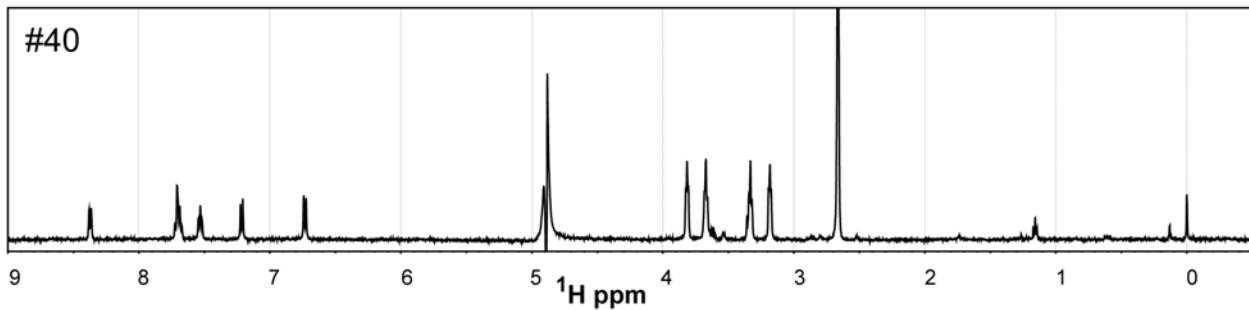

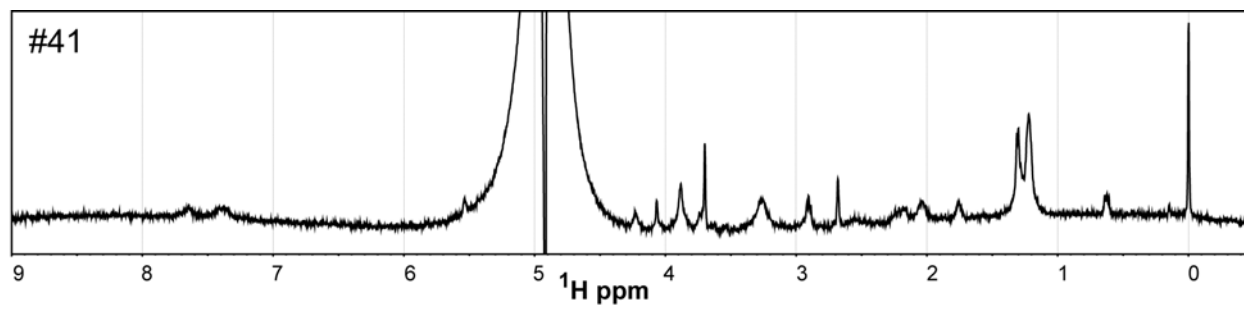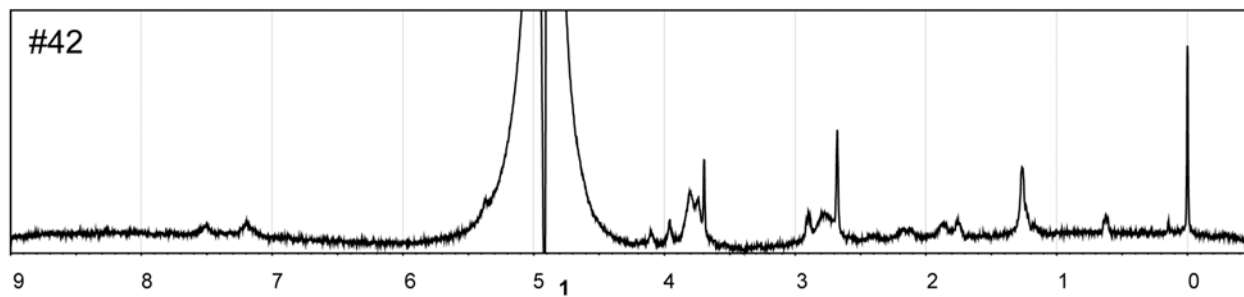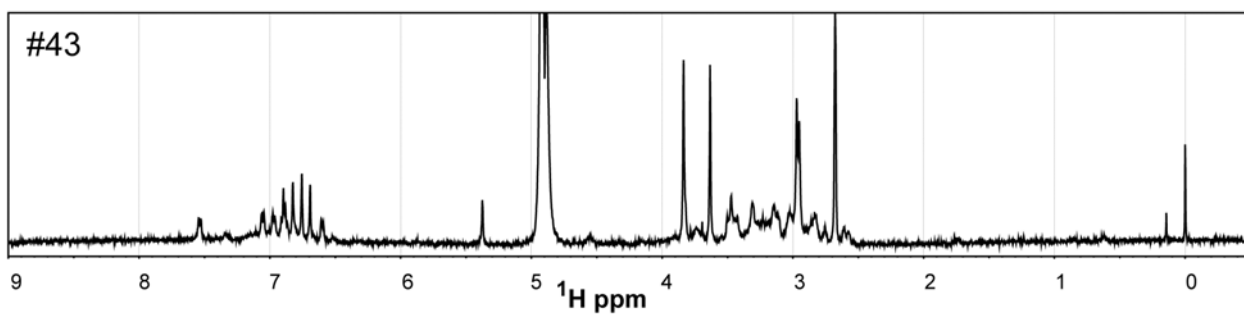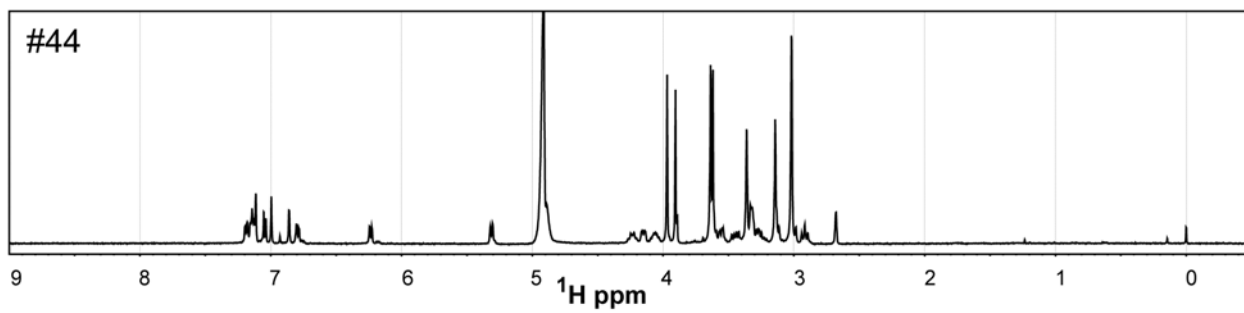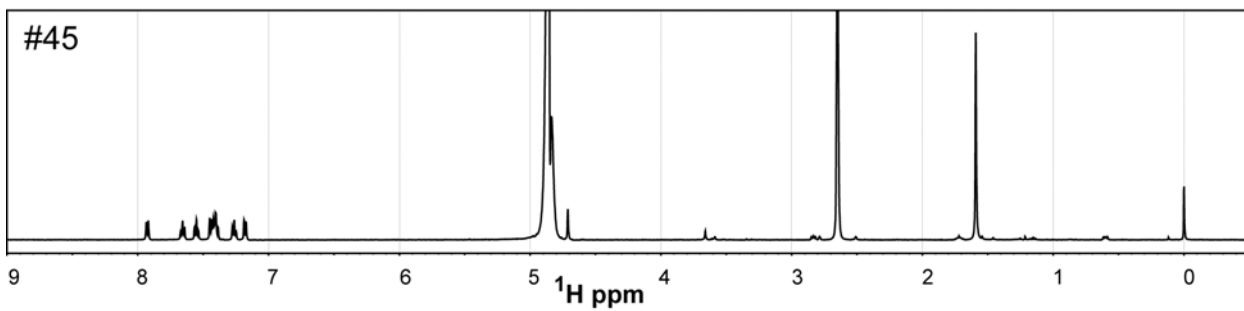

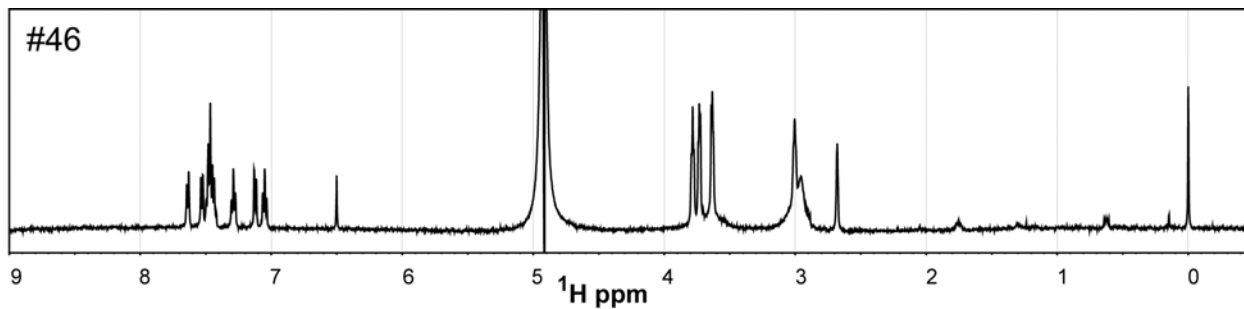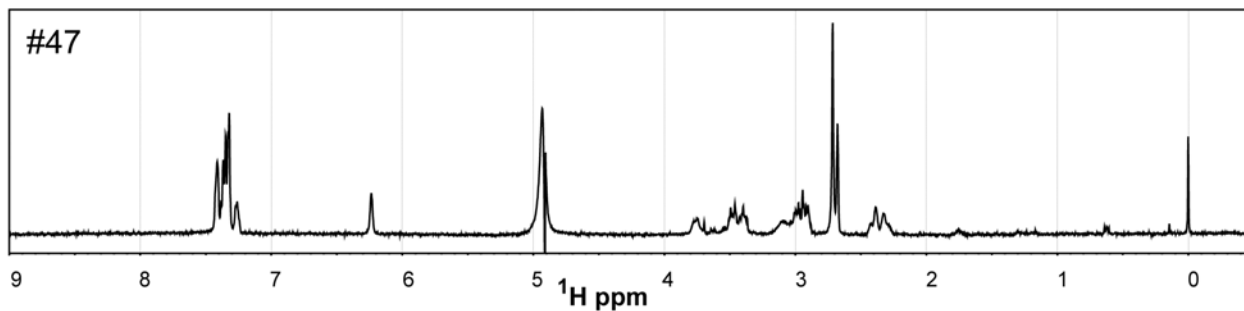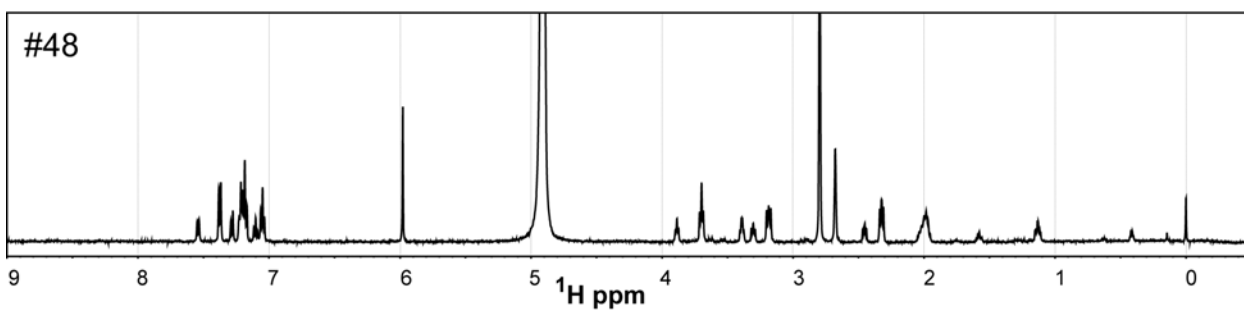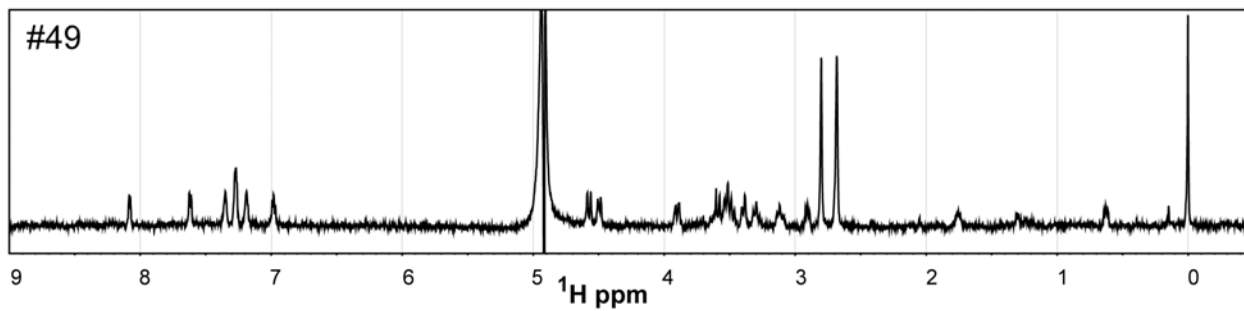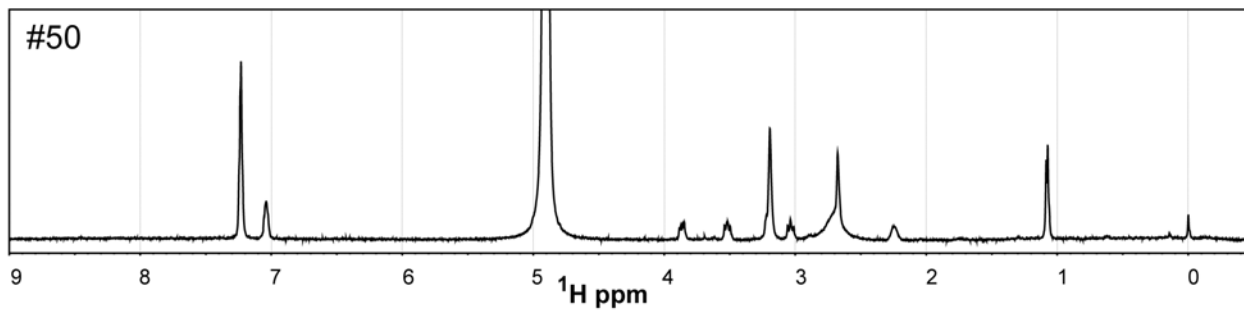

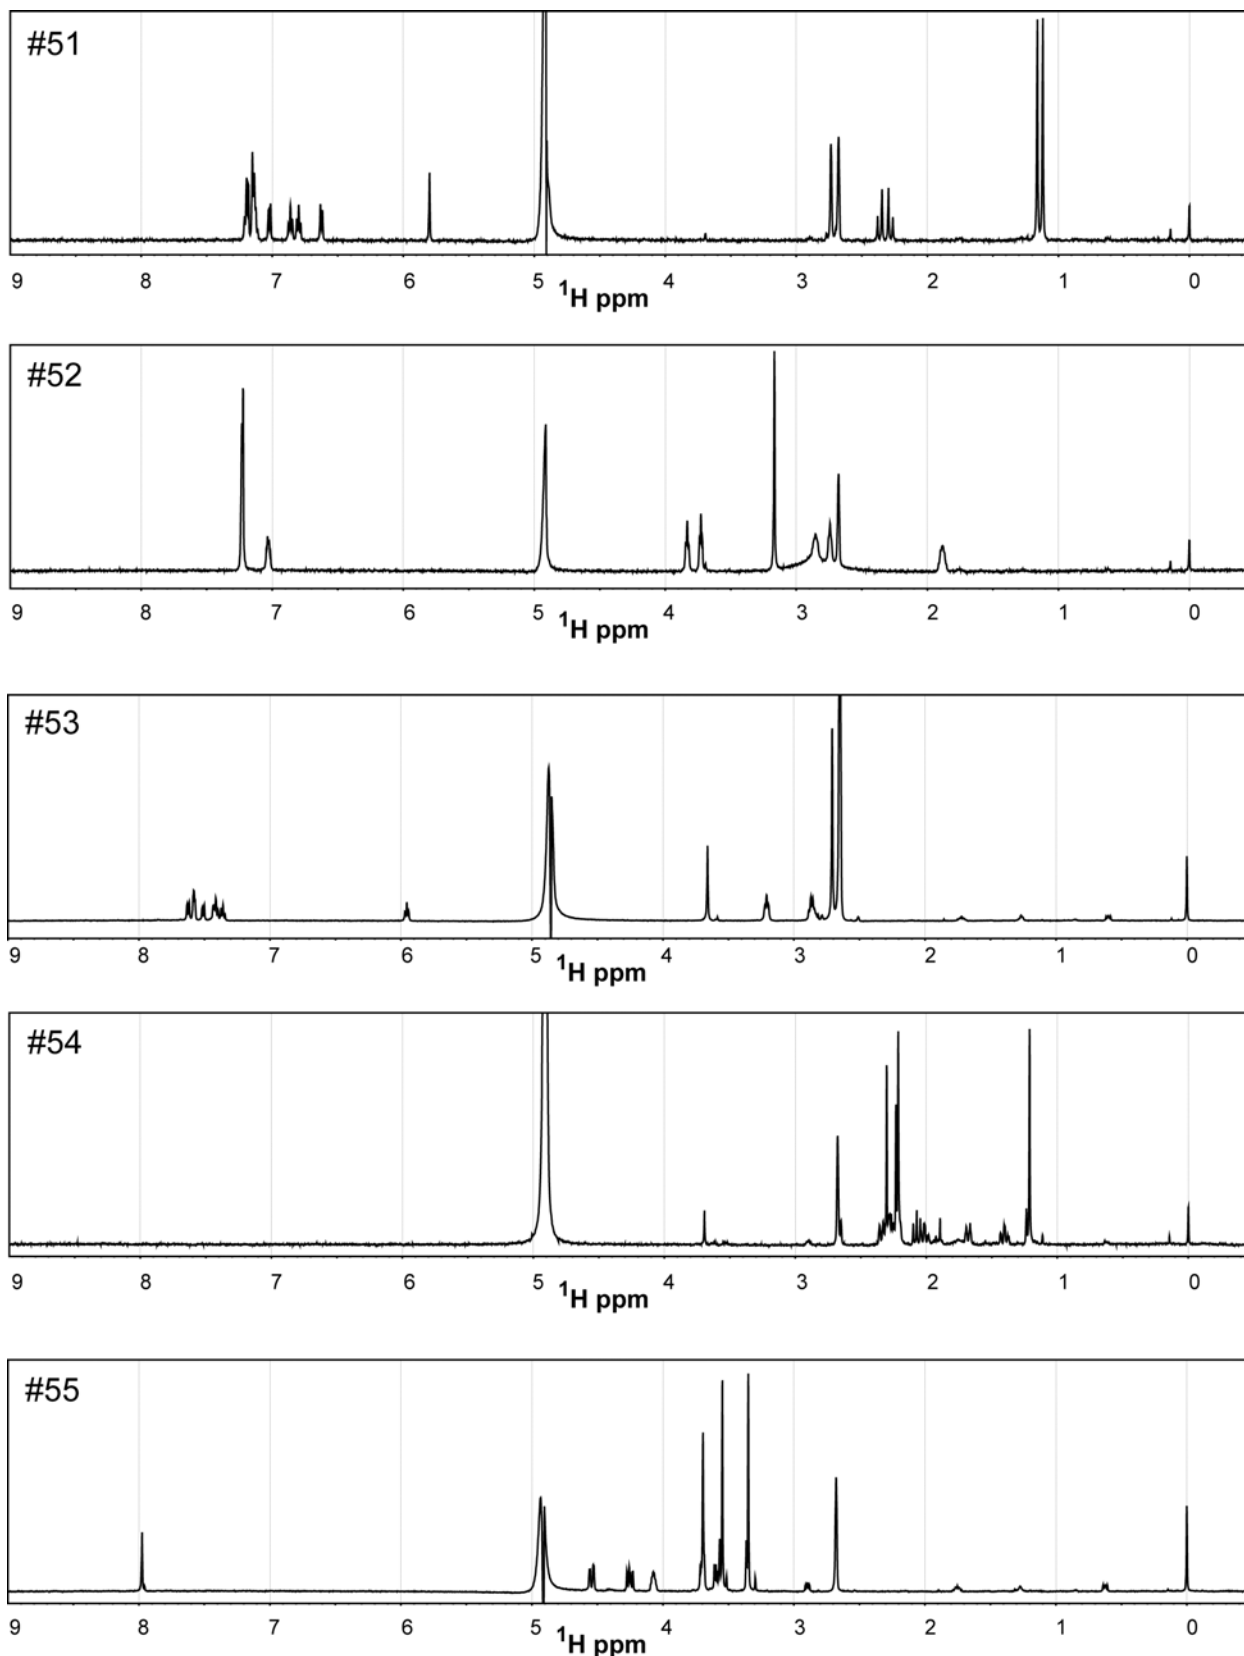

1D  $^1\text{H}$  NMR spectra of the compounds were acquired on a 500 MHz Bruker DRX spectrometer equipped with a Cryoprobe as described in the main text. The number in each box corresponds to the compound number in Fig. 3. In addition to the compound, all samples contained TSP (resonating at 0 ppm) and DMSO- $d_6$  (2.68 ppm). Also, some samples contained maleate (6 ppm), methanesulfonate (2.63 ppm), or cyclohexane (1.4 ppm).

### 3) Mass Spectrometry

#### 3.1) LC-MS/MS protocols

LC-MS/MS analyses were conducted using an Agilent 1100 HPLC (Agilent Technologies, Palo Alto, CA) equipped with a binary pump, a variable wavelength UV detector set to 254nm, a degasser, and column heater kept at 25C. Chromatographic resolution was achieved with a Phenomenex Luna, 5 $\mu$ , C18(2), 150 x 2.0nm, (Phenomenex, Torrance, CA). Mobile phases consisted of 0.1% aqueous formic acid (solvent-A) and acetonitrile with 0.08% formic acid (solvent-B) run at a constant flow rate of 1mL/min. The solvent gradient was initially set at 0% solvent-B and increased linearly to 100% solvent-B over 10min, kept at 100% solvent-B for an additional 3 min, then immediately dropped to 0% solvent-B over 0.1 min where it was held constant at 0% solvent-B for 4 min before the next sample injection (10  $\mu$ L). A Thermo Fisher TSQ Quantum Discovery Max mass spectrometer (Thermo Fisher Scientific, Waltham, MA), linked to a CTC HTS PAL Autosampler (Leap Technologies, Carrboro, NC) was used in the present studies. Electrospray ionization was employed with the needle potential held at 4.5 kV. MS/MS conditions used were 2mTorr argon collision gas and 30 eV collision potential. Positive ion mode full scan (100 to 800 Da), was conducted with scan time 0.73 seconds and source collision energy of 10 V. Xcalibur software (version 2.0, San Jose, CA) was used to acquire all data. Compounds of interest were dissolved with a mixture of acetonitrile and distilled water (1/1, v/v) to provide a concentration of 25  $\mu$ M for LC-MS and LC-MS/MS analysis. Sample size was 10  $\mu$ L. The data for each compound show the UV chromatogram, the extracted ion chromatogram (XIC) for the m/z range 100 to 800, and the XIC for the protonated molecular ion of the compound on one page. Then on the next page is the tandem mass spectrum of the compound.

Notes: The last two slides for blank acetonitrile/water LC-MS analysis. This is the same solution that was used to make the 25  $\mu$ M test solutions for each compound. The two blanks are from analysis done with one old and one new HPLC column (same make and model). Four structures (#3, 16, 25 & 36) needed to be re-analyzed. The conditions for these four compounds were as follows: analytical LC-MS ESI (Alliance HT Waters 2795 HPLC, Waters ZQ mass analyser) with a UV 254 photodiode array detector (Waters 9996 photodiode array detector), was carried out using Xterra MS C18 stationary phase (column: 5  $\mu$ m; 4.6 x 50 mm) at 1 ml/min. Solvent gradient was used: water:acetonitrile(0.05% trifluoroacetic acid) 95:5 to 0:100 over 4.5 min.

#### 3.2) LC-MS/MS Data

RT: 0.00 - 13.04 SM: 15G

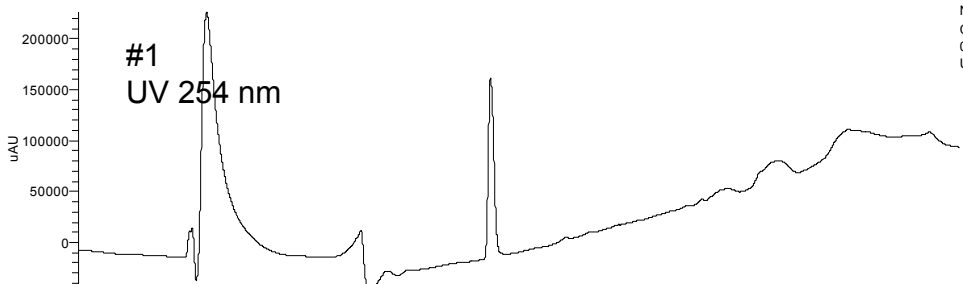

NL: 2.26E5  
Channel A UV  
08\_22\_2008\_UCSF\_P  
URITY\_A01

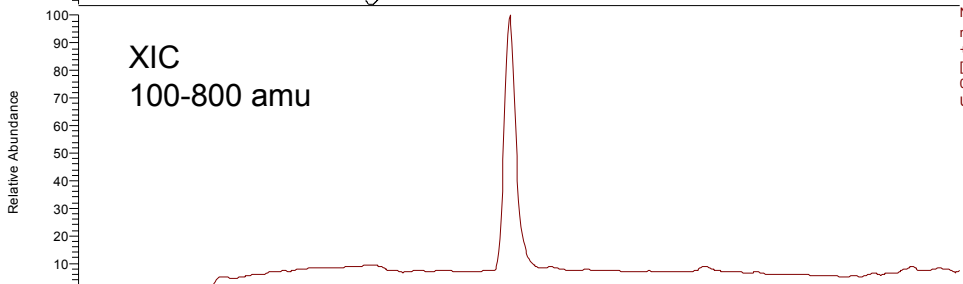

NL: 5.16E8  
m/z= 100.00-800.00 F:  
+ p sid=-10.00 Q1MS  
[50.00-1200.00] MS  
08\_22\_2008\_UCSF\_P  
URITY\_A01

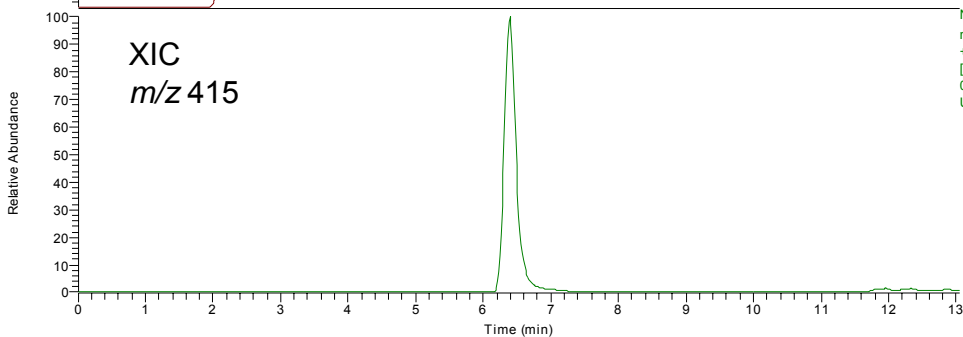

NL: 3.72E8  
m/z= 414.50-415.50 F:  
+ p sid=-10.00 Q1MS  
[50.00-1200.00] MS  
08\_22\_2008\_UCSF\_P  
URITY\_A01

08\_22\_2008\_UCSF\_PURITY\_A01\_080824185156 #424-447 RT: 6.28-6.62 AV: 24 SB: 2 0.01, 0.01 SM: 15G NL: 1.71E7  
F: + p sid=-10.00 Full ms2 415.10@-30.00 [50.00-700.00]

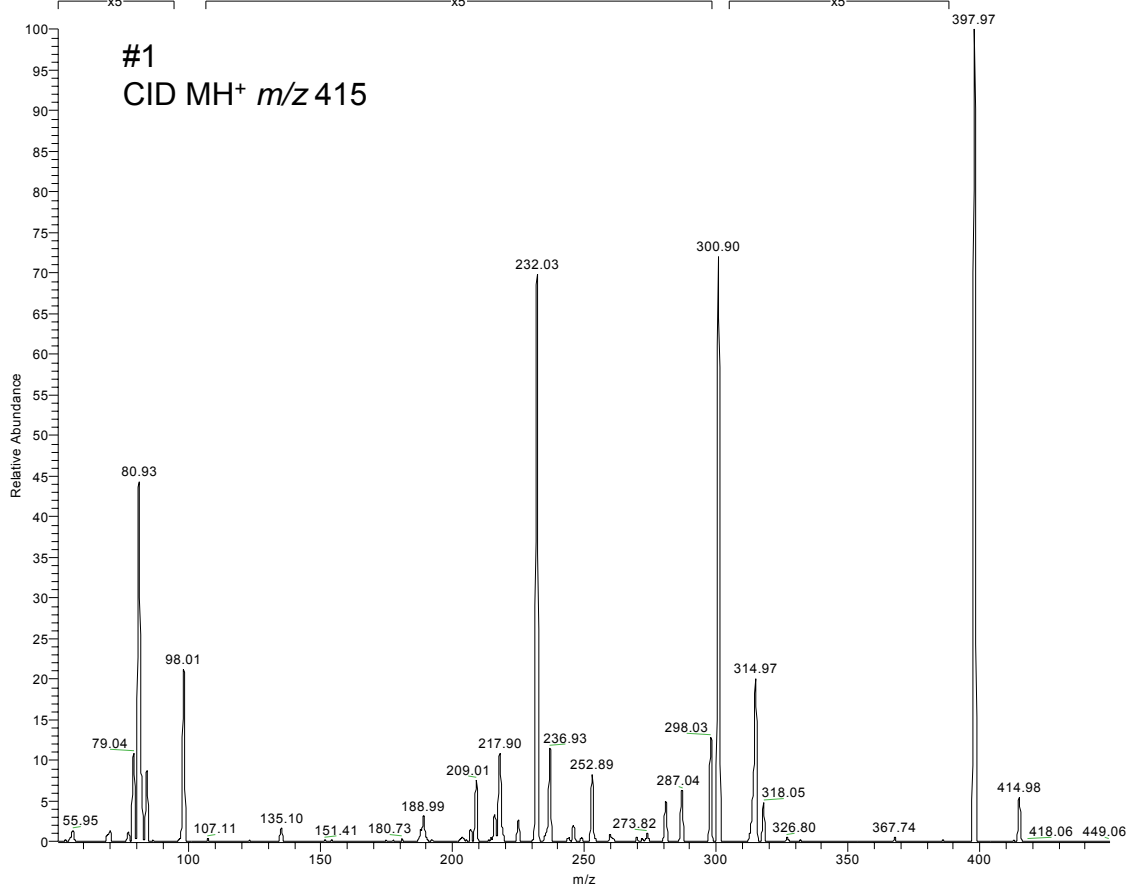



RT: 0.00 - 13.04 SM: 15G

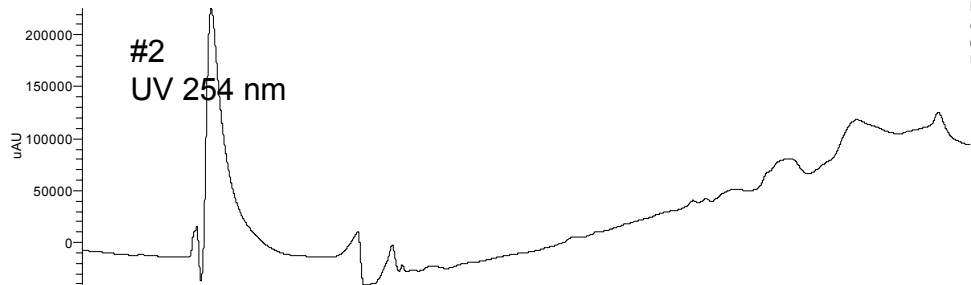

NL: 2.25E5  
Channel A UV  
08\_22\_2008\_UCSF\_P  
URITY\_A02

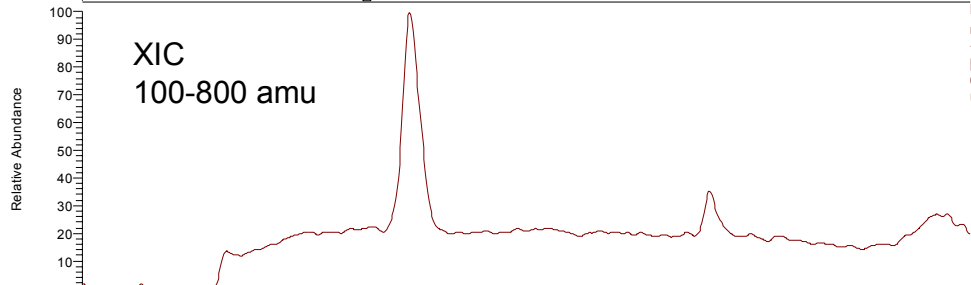

NL: 1.86E8  
m/z= 100.00-800.00 F:  
+ p sid=-10.00 Q1MS  
[ 50.00-1200.00] MS  
08\_22\_2008\_UCSF\_P  
URITY\_A02

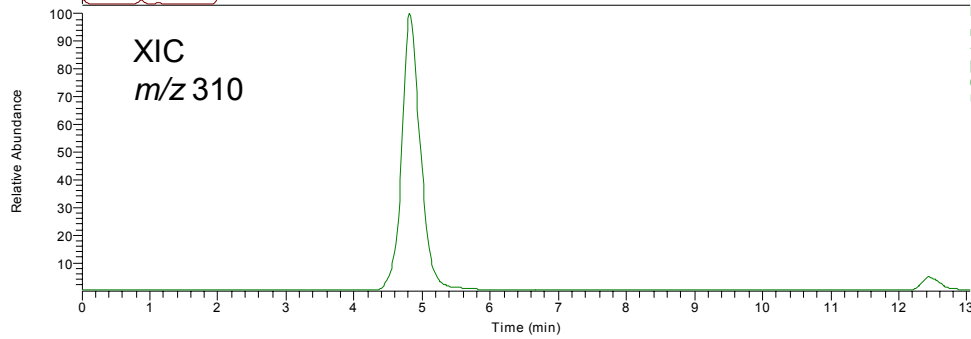

NL: 1.11E8  
m/z= 309.50-310.50 F:  
+ p sid=-10.00 Q1MS  
[ 50.00-1200.00] MS  
08\_22\_2008\_UCSF\_P  
URITY\_A02

08\_22\_2008\_UCSF\_PURITY\_A02\_080824190943 #317-344 RT: 4.69-5.09 AV: 28 SB: 2 17.00, 17.00 SM: 15G NL: 1.44E6  
F: + p sid=-10.00 Full ms2 310.10@-30.00 [ 50.00-700.00]

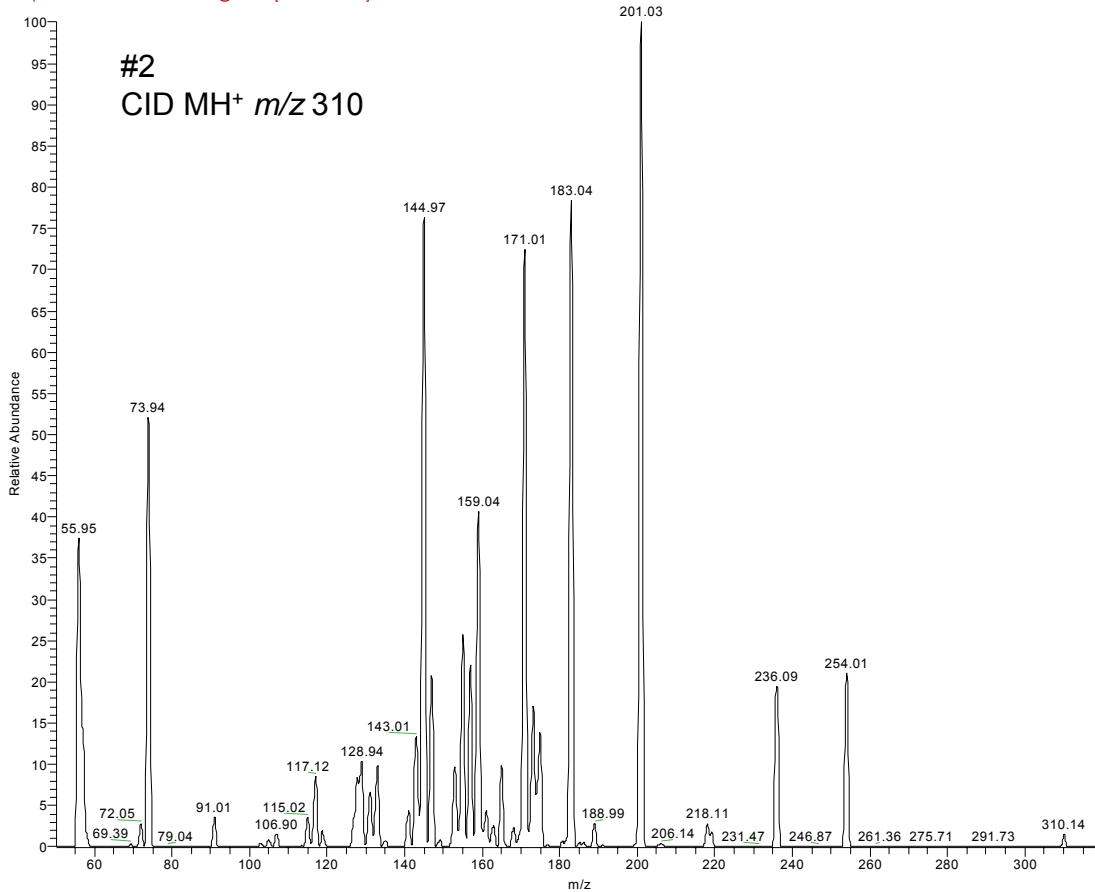

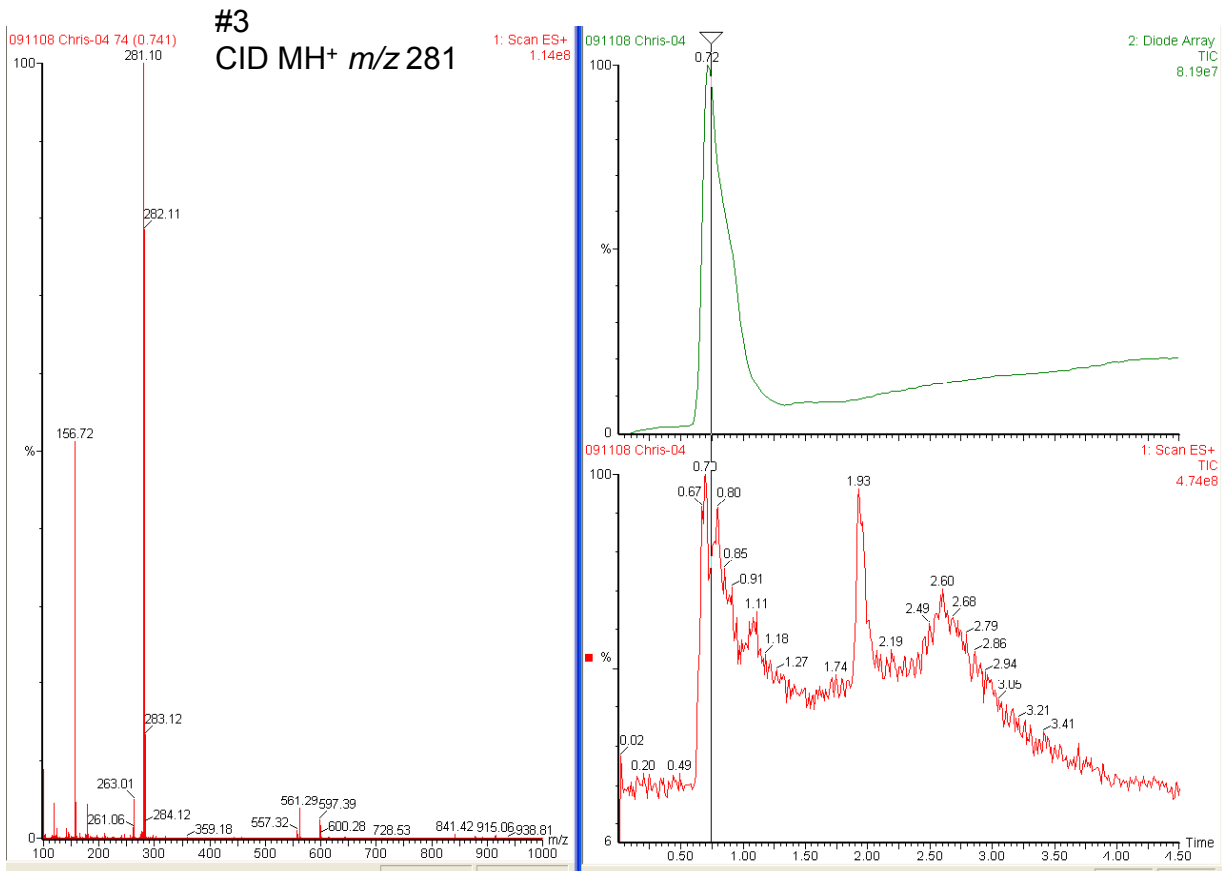

RT: 0.00 - 13.04 SM: 15G

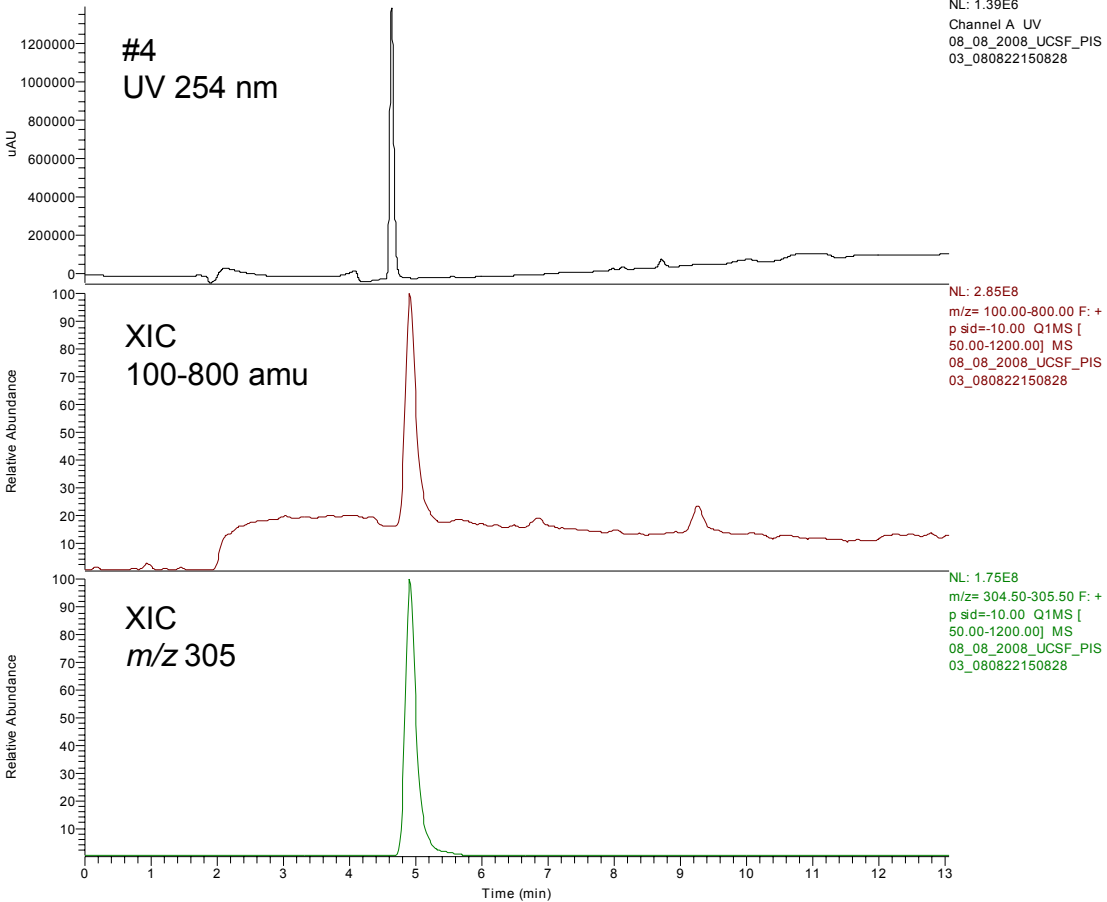

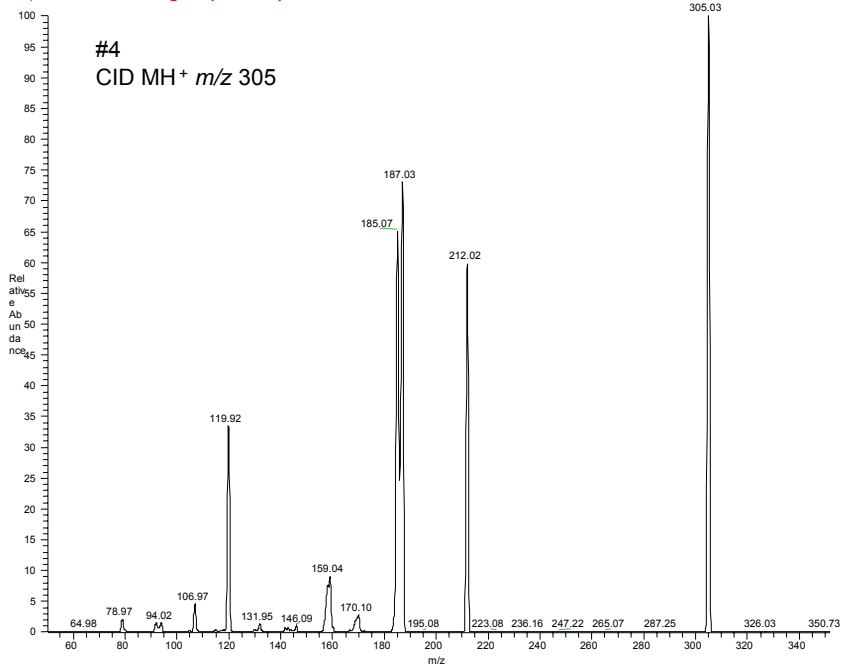

RT: 0.00 - 13.04 SM: 15G

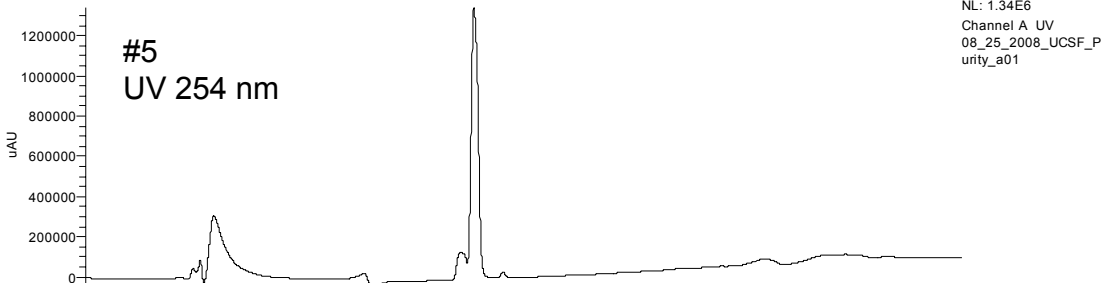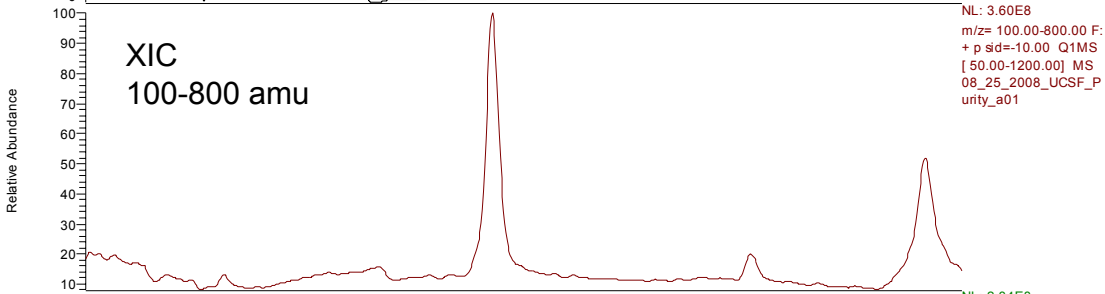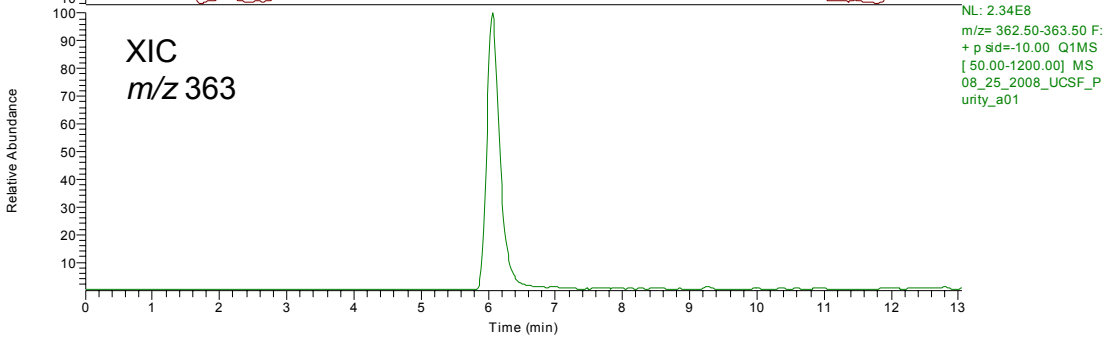

RT: 0.00 - 13.04 SM: 15G

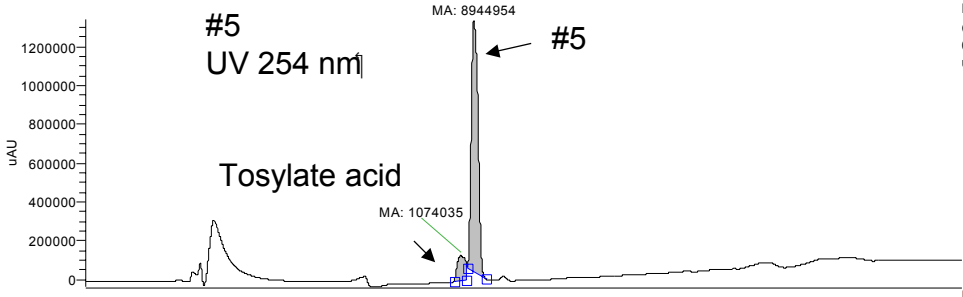

NL: 1.34E6  
Channel A UV  
08\_25\_2008\_UCSF\_P  
unity\_a01

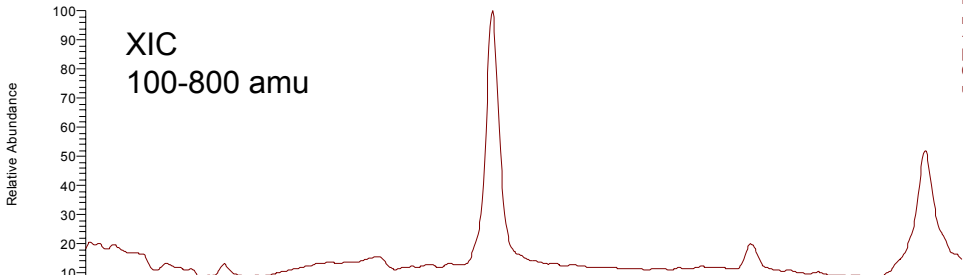

NL: 3.60E8  
m/z= 100.00-800.00 F:  
+ p sid=-10.00 Q1MS  
[ 50.00-1200.00] MS  
08\_25\_2008\_UCSF\_P  
unity\_a01

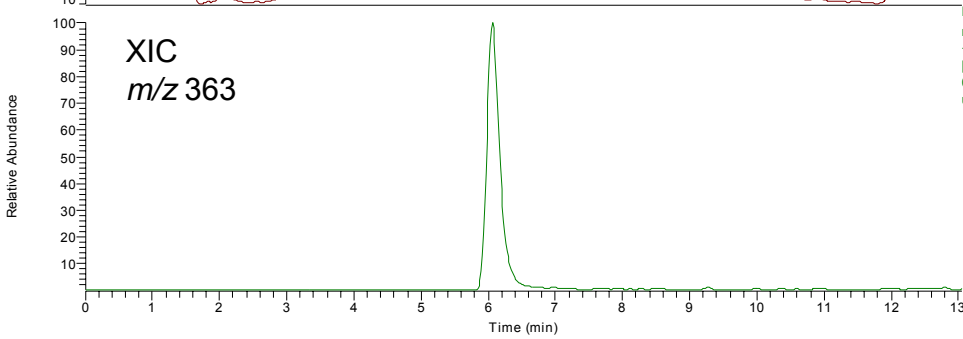

NL: 2.34E8  
m/z= 362.50-363.50 F:  
+ p sid=-10.00 Q1MS  
[ 50.00-1200.00] MS  
08\_25\_2008\_UCSF\_P  
unity\_a01

08\_22\_2008\_UCSF\_PURITY\_A05\_080824194517 #412-432 RT: 6.10-6.40 AV: 21 SB: 2 17.00 , 17.00 SM: 15G NL: 3.77E6  
F: + p sid=-10.00 Full ms2 363.10@-30.00 [ 50.00-700.00]

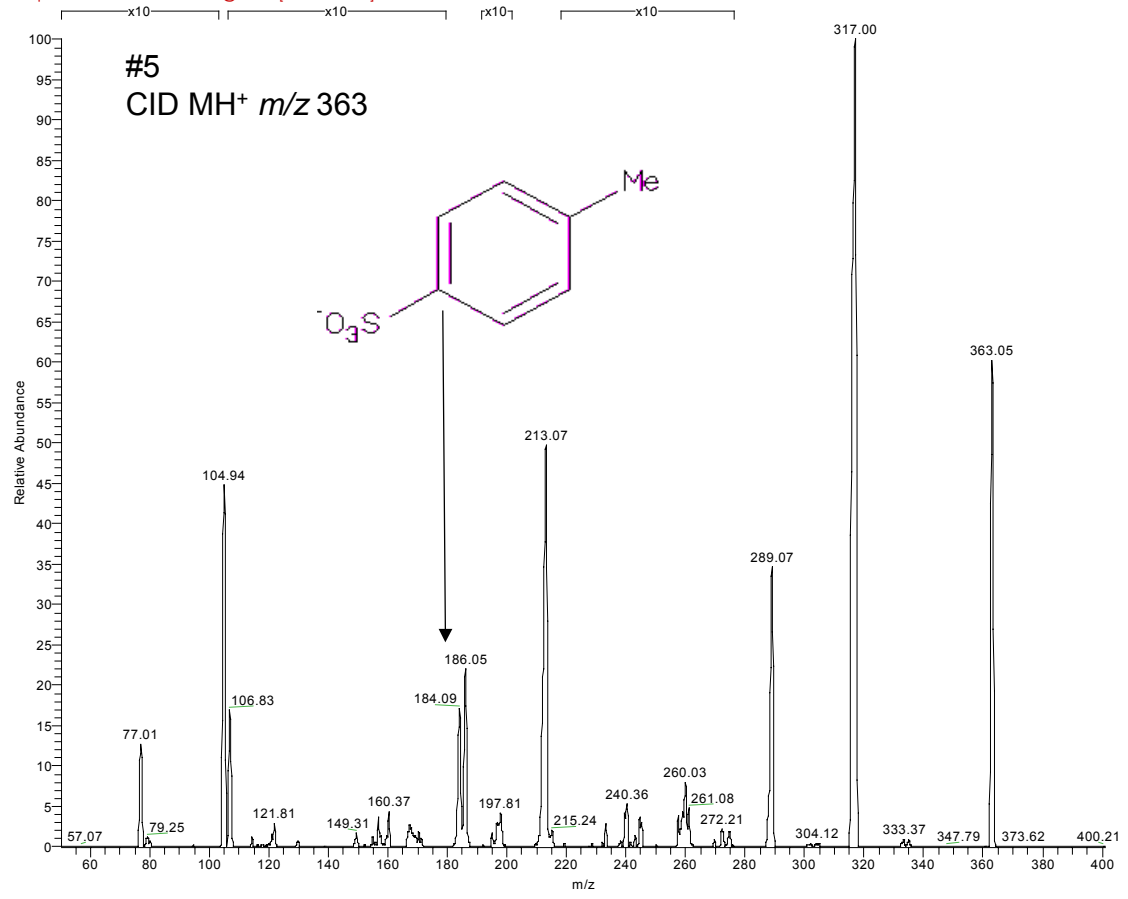

RT: 0.00 - 13.04 SM: 15G

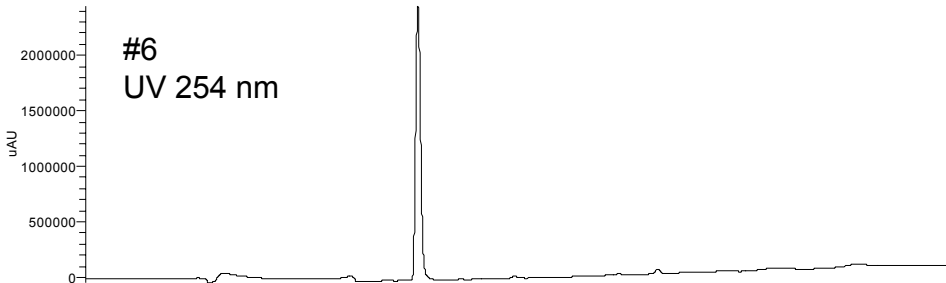

NL: 2.44E6  
Channel A UV  
08\_08\_2008\_UCSF\_PIS  
05\_080822154359

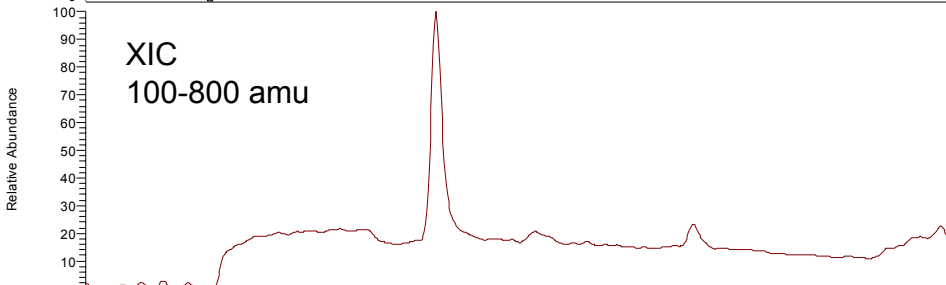

NL: 2.52E8  
m/z= 100.00-800.00 F: +  
p sid=-10.00 Q1MS [  
50.00-1200.00] MS  
08\_08\_2008\_UCSF\_PIS  
05\_080822154359

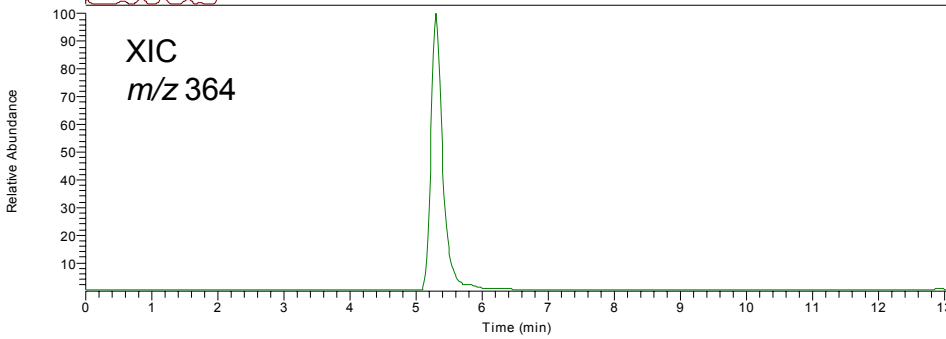

NL: 1.61E8  
m/z= 363.50-364.50 F: +  
p sid=-10.00 Q1MS [  
50.00-1200.00] MS  
08\_08\_2008\_UCSF\_PIS  
05\_080822154359

08\_08\_2008\_UCSF\_PIS05\_080821163810 #347-364 RT: 5.14-5.39 AV: 18 SB: 2 16.99, 16.99 SM: 15G NL: 2.46E7

F: + p sid=-10.00 Full m/z 364.10@-30.00 [ 50.00-700.00]

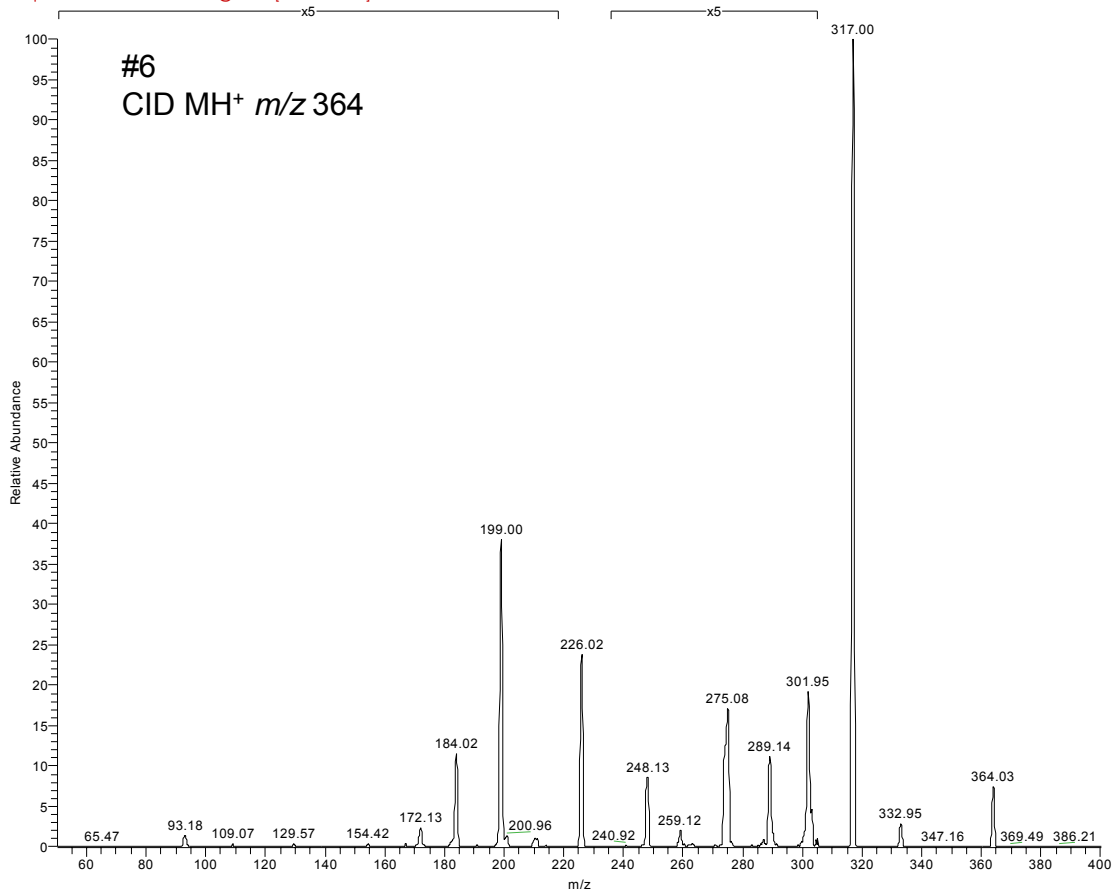

RT: 0.00 - 13.04 SM: 15G

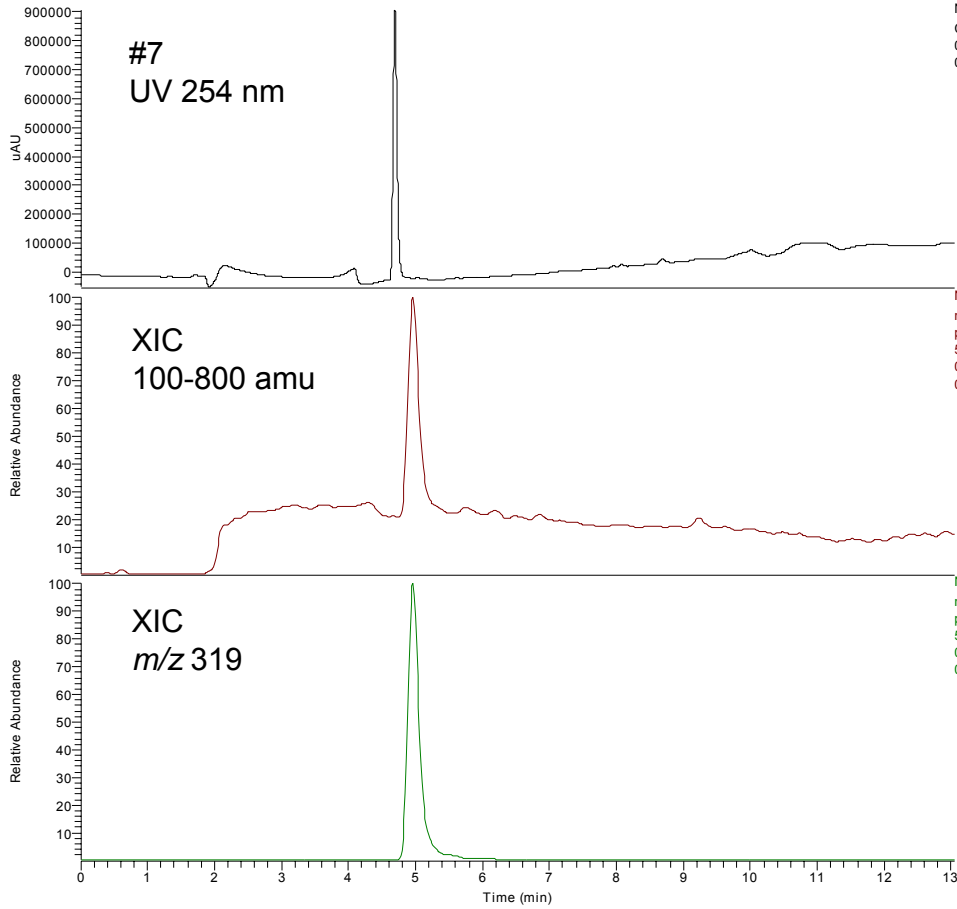

08\_08\_2008\_UCSF\_PIS06\_080821165558 #324-339 RT: 4.80-5.02 AV: 16 SB: 2 16.99, 16.99 SM: 15G NL: 8.70E6  
F: + p sid=-10.00 Full ms2 319.10@-30.00 [ 50.00-700.00]

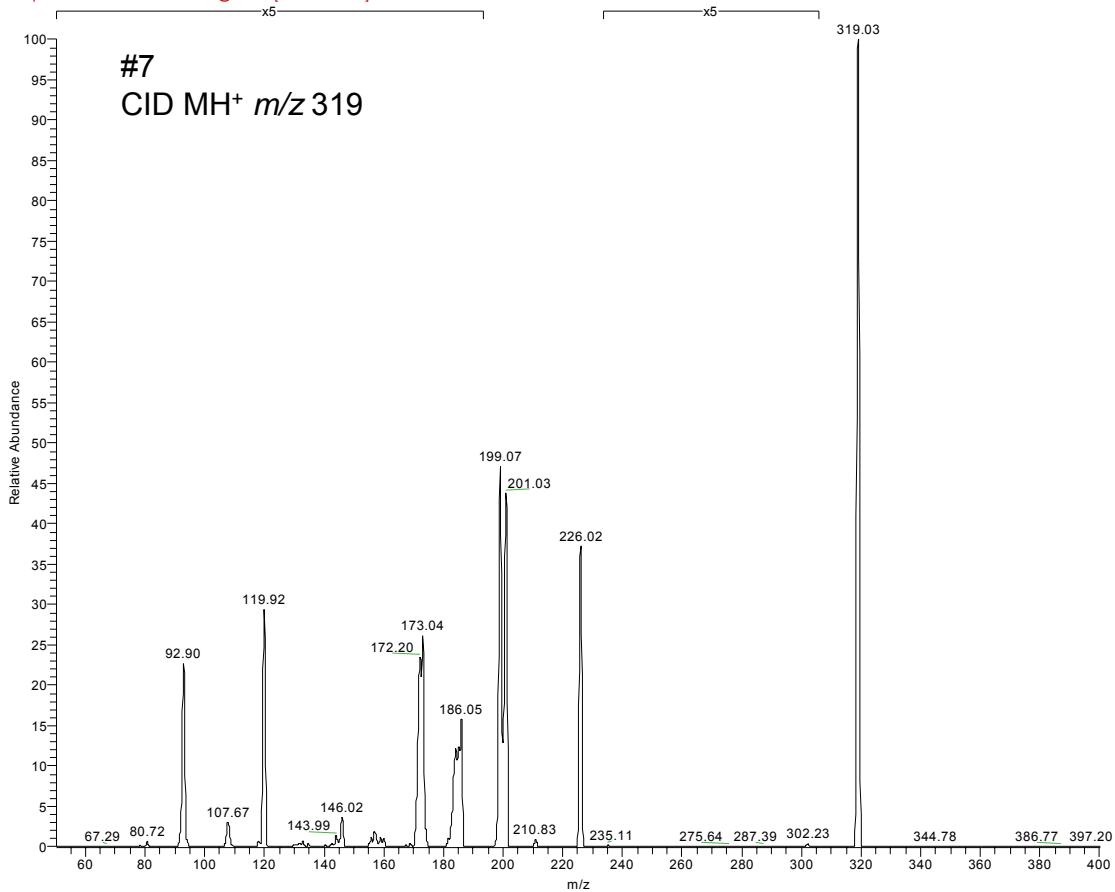

RT: 0.00 - 13.04 SM: 15G

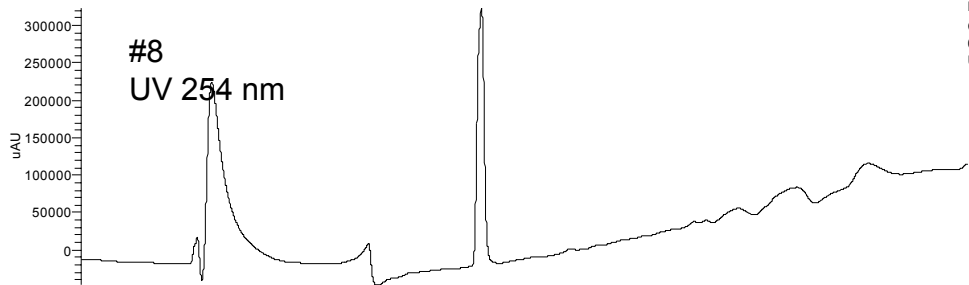

NL: 3.22E5  
Channel A\_UV  
08\_22\_2008\_UCSF\_P  
URITY\_A06

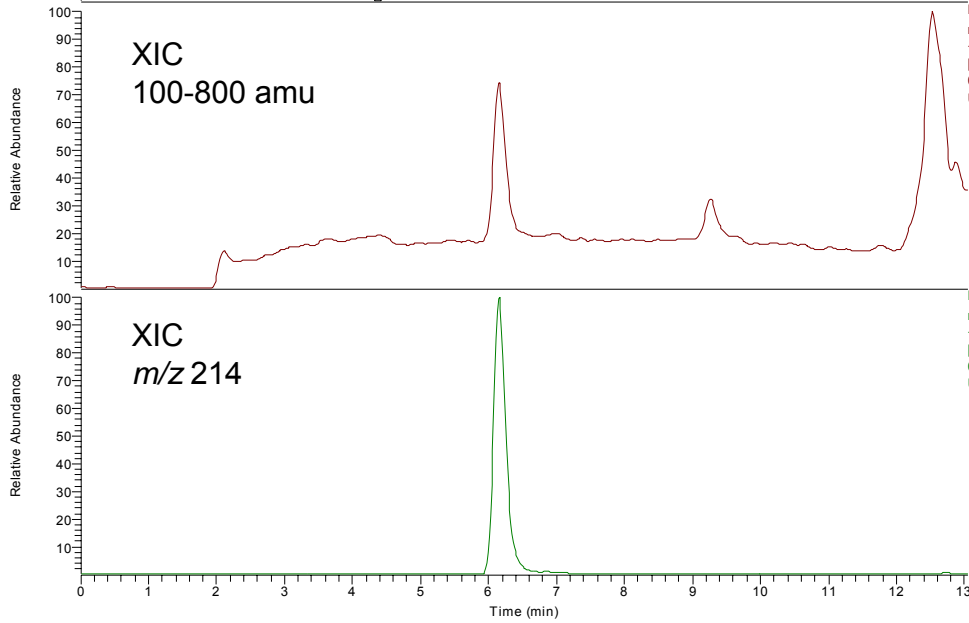

NL: 2.13E8  
m/z= 100.00-800.00 F:  
+ p sd=-10.00 Q1MS  
[ 50.00-1200.00] MS  
08\_22\_2008\_UCSF\_P  
URITY\_A06

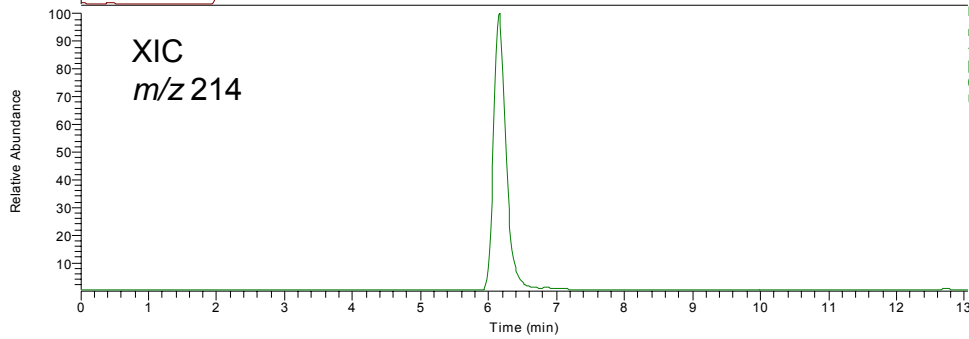

NL: 9.20E7  
m/z= 213.50-214.50 F:  
+ p sd=-10.00 Q1MS  
[ 50.00-1200.00] MS  
08\_22\_2008\_UCSF\_P  
URITY\_A06

08\_22\_2008\_UCSF\_PURITY\_A06\_080824200302 #404-421 RT: 5.98-6.24 AV: 18 SB: 2 17.00, 17.00 SM: 15G NL: 1.91E6  
F: + p sd=-10.00 Full ms2 214.10@-30.00 [ 50.00-700.00]

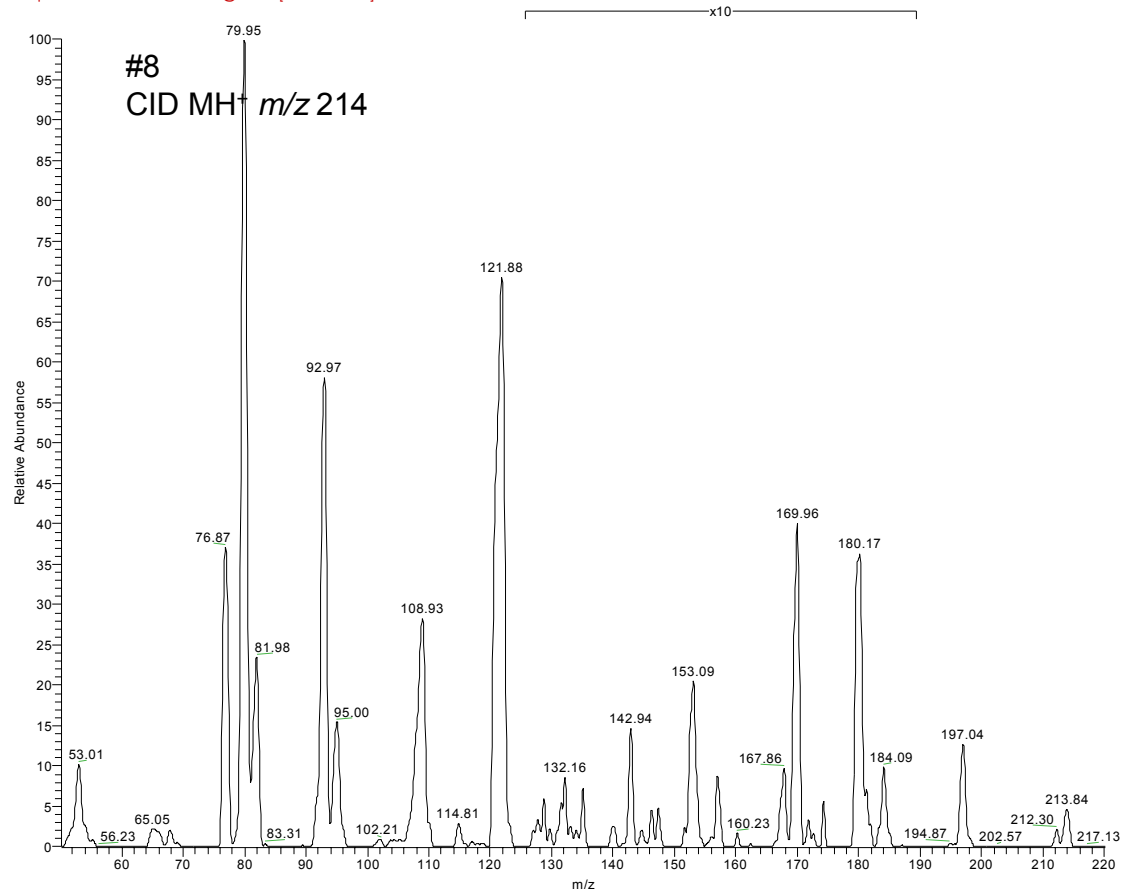

RT: 0.00 - 13.04 SM: 15G

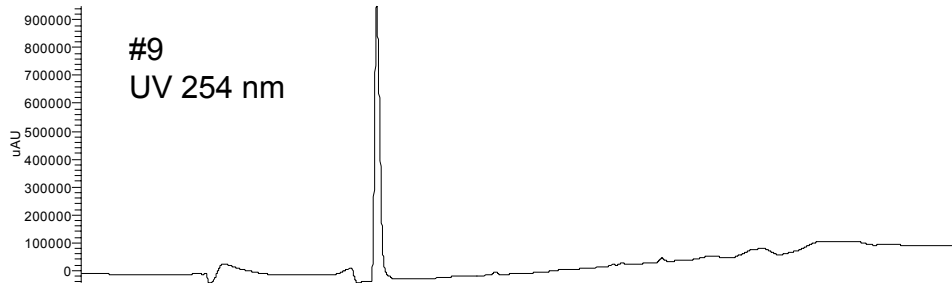

NL: 9.47E5  
Channel A UV  
08\_08\_2008\_UCSF\_PIS  
07\_080822161927

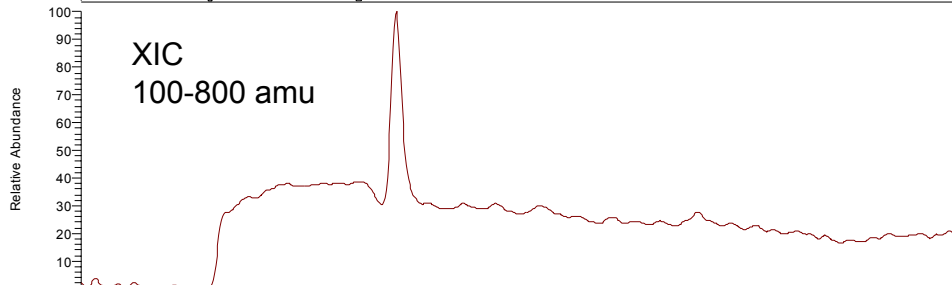

NL: 1.56E8  
m/z= 100.00-800.00 F: +  
p sid=-10.00 Q1MS [  
50.00-1200.00] MS  
08\_08\_2008\_UCSF\_PIS  
07\_080822161927

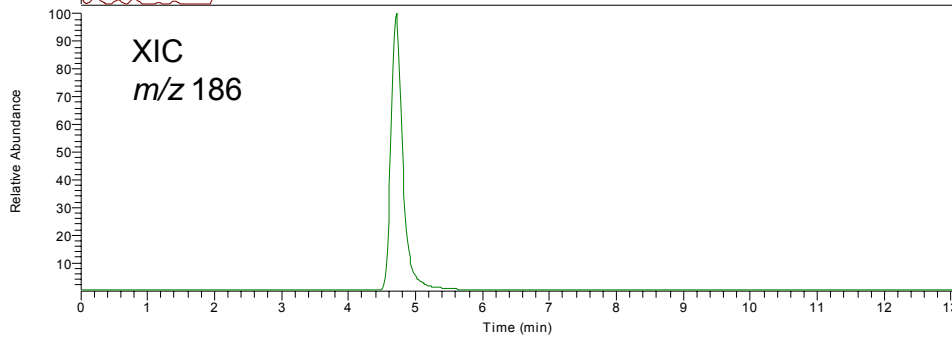

NL: 9.40E7  
m/z= 185.50-186.50 F: +  
p sid=-10.00 Q1MS [  
50.00-1200.00] MS  
08\_08\_2008\_UCSF\_PIS  
07\_080822161927

08\_08\_2008\_UCSF\_PIS07\_080821171342 #307-318 RT: 4.54-4.71 AV: 12 SB: 2 17.00, 17.00 SM: 15G NL: 2.44E6  
F: + p sid=-10.00 Full ms2 186.10@-30.00 [ 50.00-700.00]

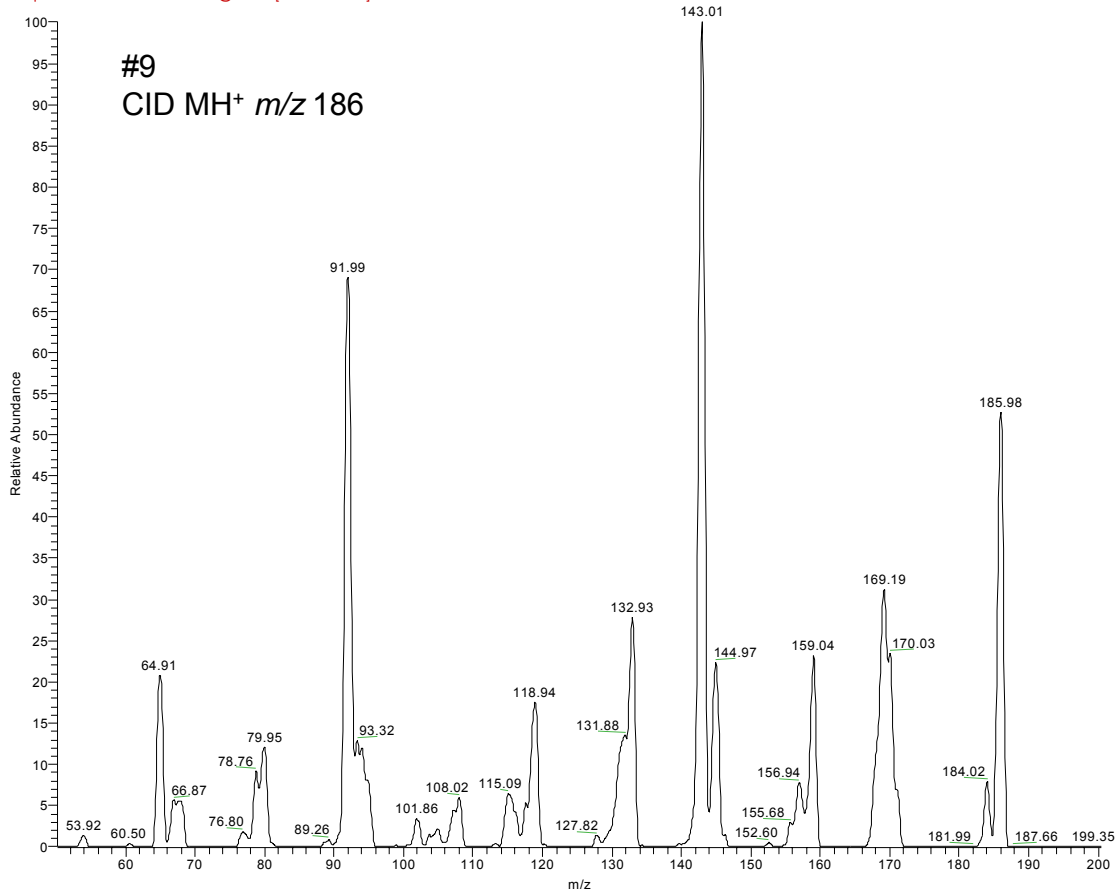



RT: 0.00 - 13.04 SM: 15G

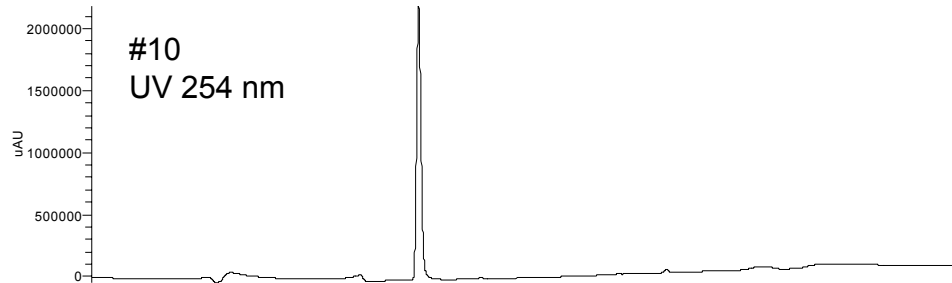

NL: 2.18E6  
Channel A UV  
08\_08\_2008\_UCSF\_PIS  
08\_080822163713

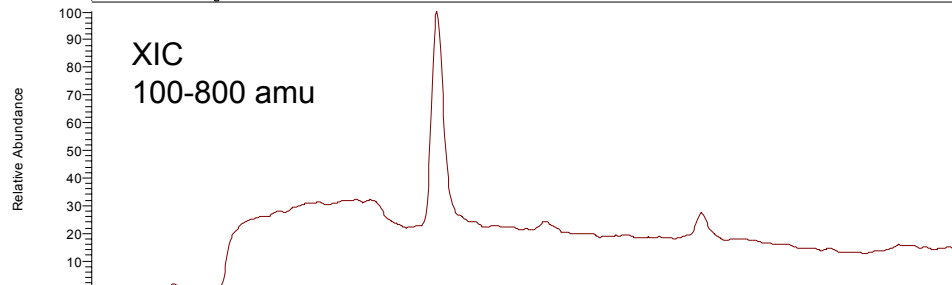

NL: 2.04E8  
m/z= 100.00-800.00 F: +  
p sid=-10.00 Q1MS [  
50.00-1200.00] MS  
08\_08\_2008\_UCSF\_PIS  
08\_080822163713

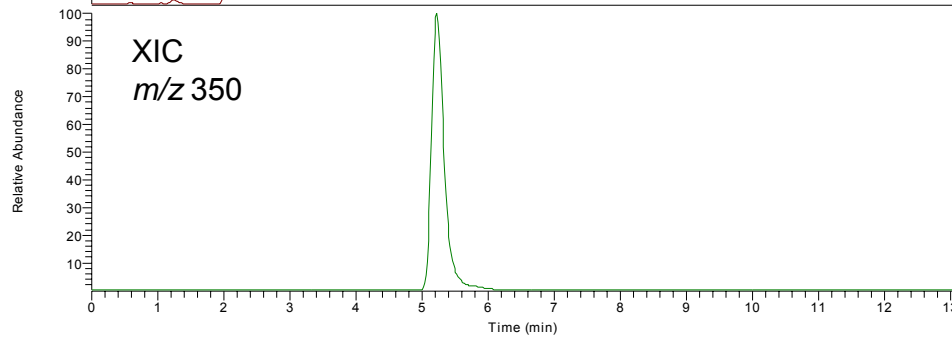

NL: 1.20E8  
m/z= 349.50-350.50 F: +  
p sid=-10.00 Q1MS [  
50.00-1200.00] MS  
08\_08\_2008\_UCSF\_PIS  
08\_080822163713

08\_08\_2008\_UCSF\_PIS08\_080821173129 #338-358 RT: 5.00-5.30 AV: 21 SB: 2 17.00, 17.00 SM: 15G NL: 1.71E7

F: + p sid=-10.00 Full m/z 350.10@-30.00 [ 50.00-700.00]

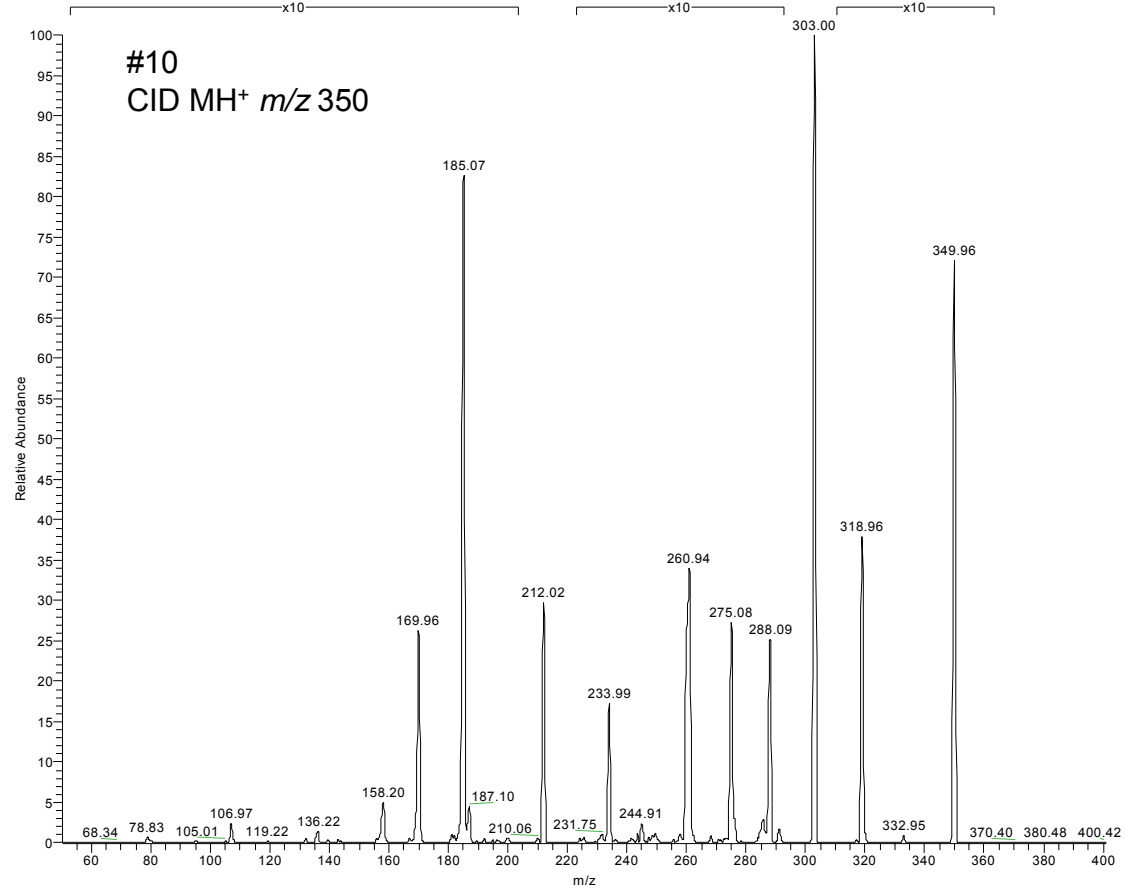

RT: 0.00 - 13.04 SM: 15G

NL: 2.18E5  
Channel A\_UV  
08\_22\_2008\_UCSF\_P  
URITY\_A07

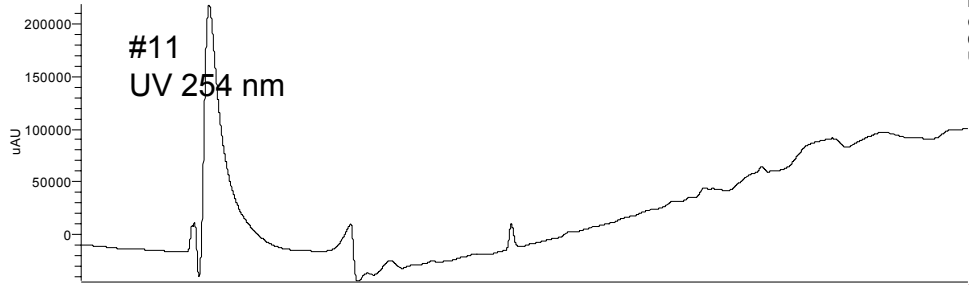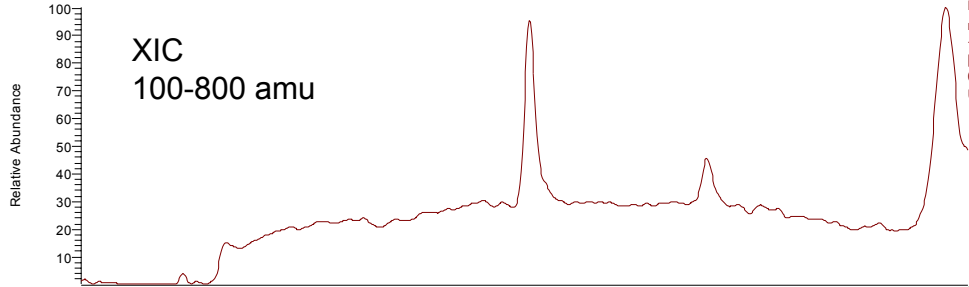

NL: 1.65E8  
m/z= 100.00-800.00 F:  
+ p sd=-10.00 Q1MS  
[ 50.00-1200.00] MS  
08\_22\_2008\_UCSF\_P  
URITY\_A07

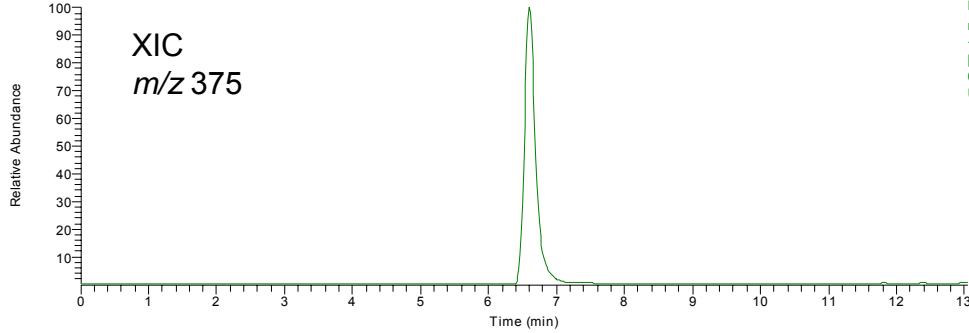

NL: 5.54E7  
m/z= 374.50-375.50 F:  
+ p sd=-10.00 Q1MS  
[ 50.00-1200.00] MS  
08\_22\_2008\_UCSF\_P  
URITY\_A07

08\_22\_2008\_UCSF\_PURITY\_A07\_080824202046 #444-455 RT: 6.58-6.74 AV: 12 SB: 2 16.99, 16.99 SM: 15G NL: 9.20E6  
F: + p sd=-10.00 Full m/z 375.10@-30.00 [ 50.00-700.00]

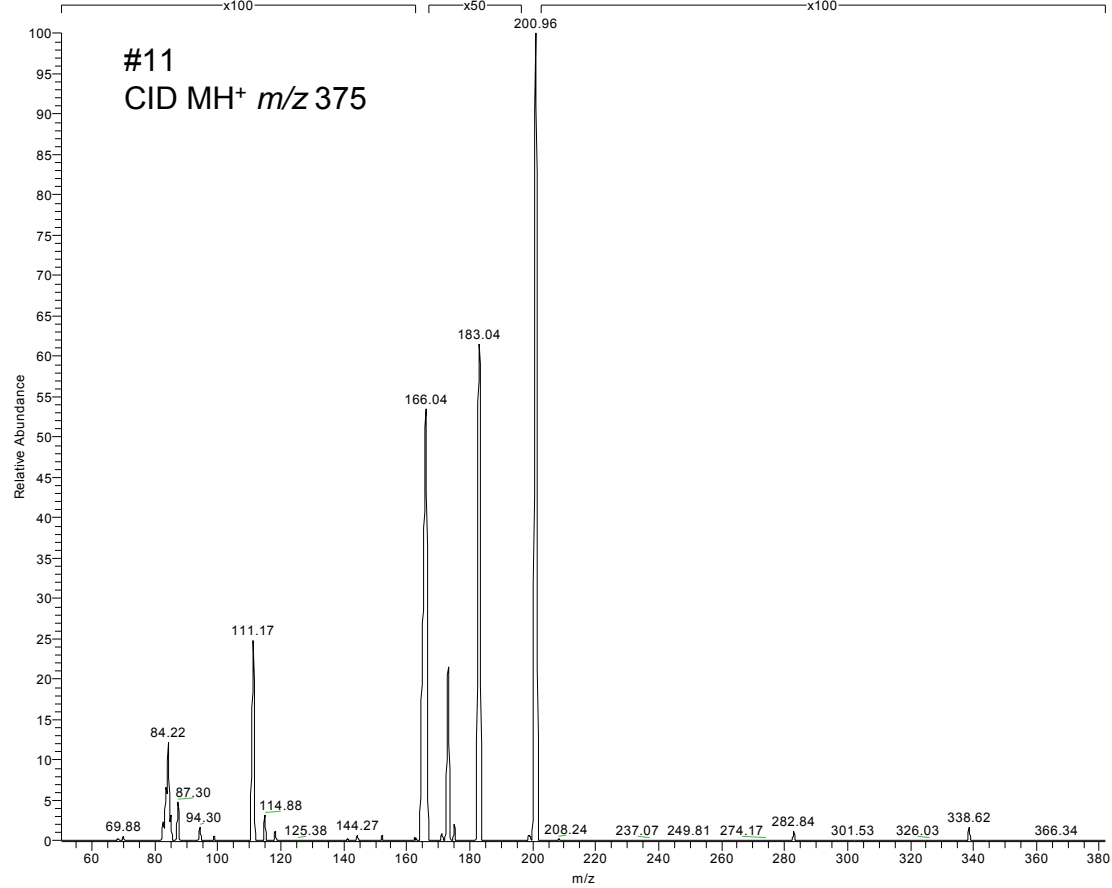

RT: 0.00 - 13.04 SM: 15G

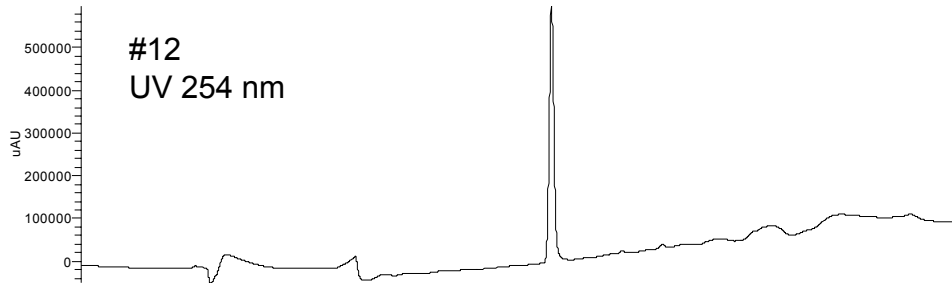

NL: 5.96E5  
Channel A UV  
08\_08\_2008\_UCSF\_PIS  
09\_080822165500

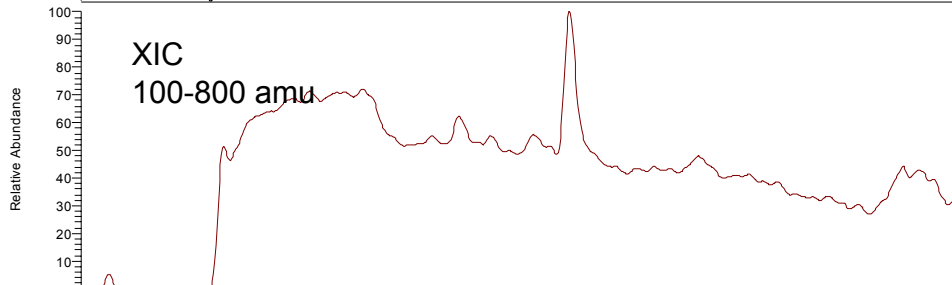

NL: 8.97E7  
m/z= 100.00-800.00 F: +  
p sid=-10.00 Q1MS [  
50.00-1200.00] MS  
08\_08\_2008\_UCSF\_PIS  
09\_080822165500

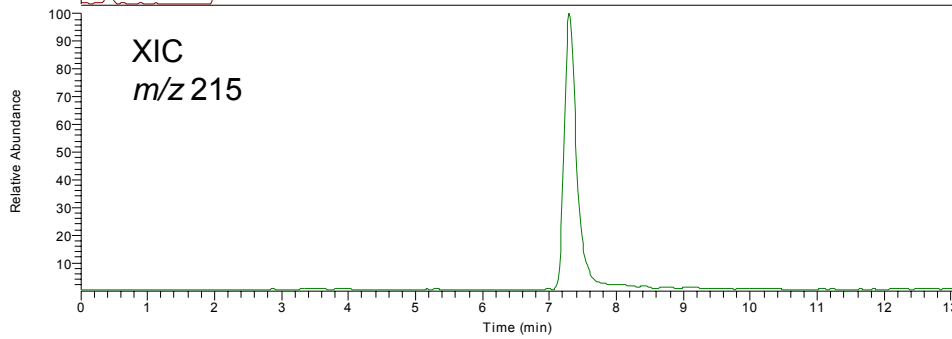

NL: 3.60E7  
m/z= 214.50-215.50 F: +  
p sid=-10.00 Q1MS [  
50.00-1200.00] MS  
08\_08\_2008\_UCSF\_PIS  
09\_080822165500

08\_08\_2008\_UCSF\_PIS09\_080821174913 #482-499 RT: 7.14-7.39 AV: 18 SB: 2 17.00, 17.00 SM: 15G NL: 1.77E6  
F: + p sid=-10.00 Full m/z 215.10@-30.00 [ 50.00-700.00]

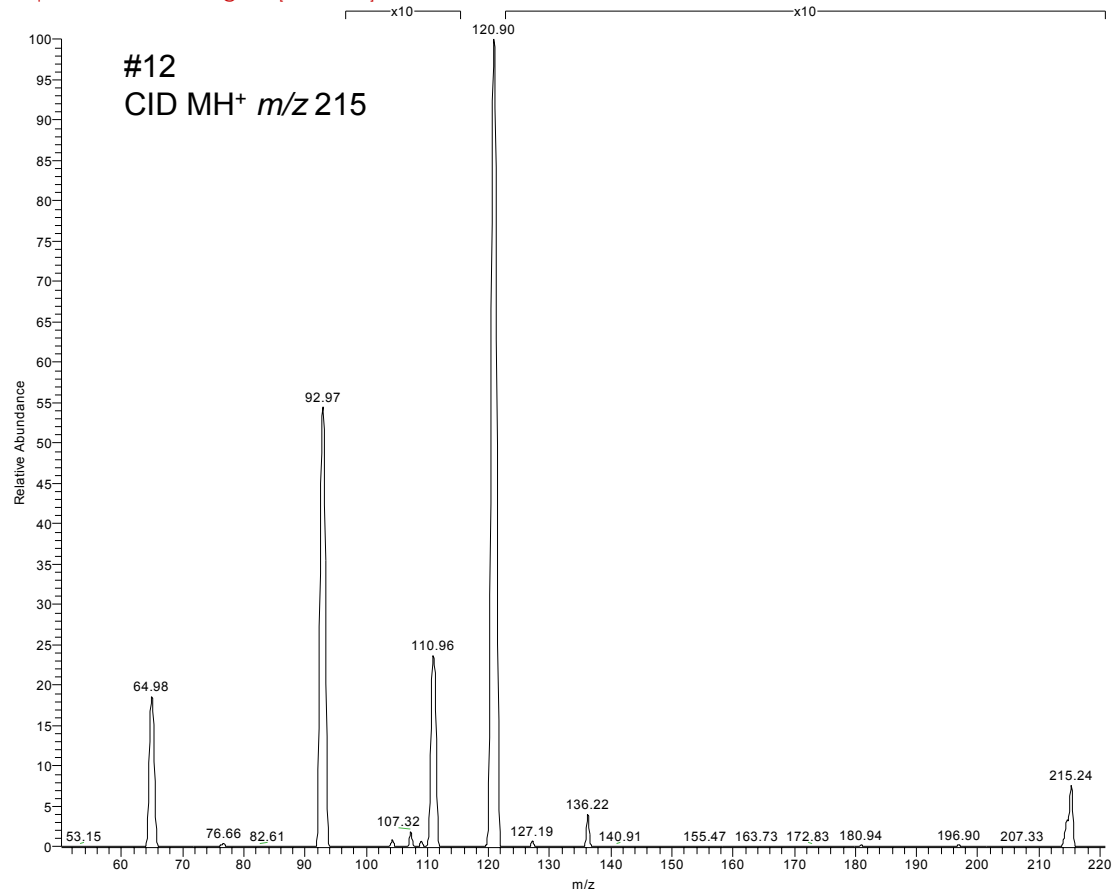

RT: 0.00 - 13.04 SM: 15G

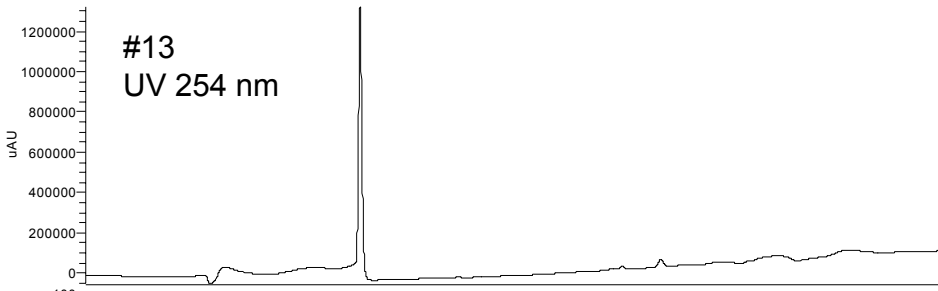

NL: 1.32E6  
Channel A UV  
08\_08\_2008\_UCSF\_PIS  
13\_080822171247

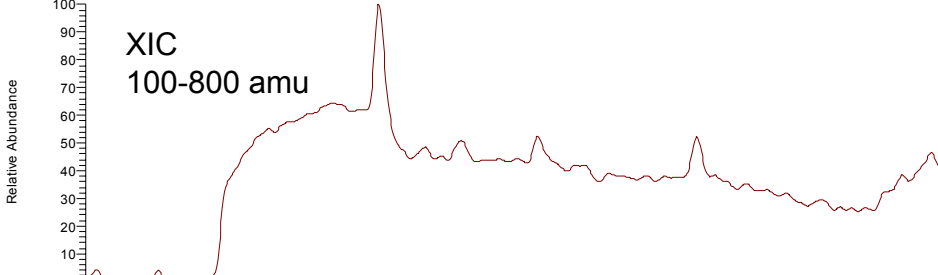

NL: 1.06E8  
m/z= 100.00-800.00 F: +  
p sld=-10.00 Q1MS [  
50.00-1200.00] MS  
08\_08\_2008\_UCSF\_PIS  
13\_080822171247

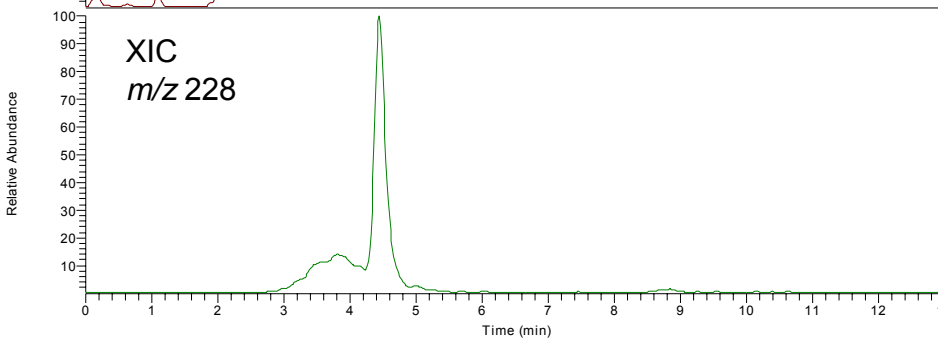

NL: 3.48E7  
m/z= 227.50-228.50 F: +  
p sld=-10.00 Q1MS [  
50.00-1200.00] MS  
08\_08\_2008\_UCSF\_PIS  
13\_080822171247

08\_08\_2008\_UCSF\_PIS13\_080821180657 #283-292 RT: 4.19-4.32 AV: 10 SB: 2 16.99, 16.99 SM: 15G NL: 2.59E6

F: + p sld=-10.00 Full ms2 228.10@-30.00 [ 50.00-700.00]

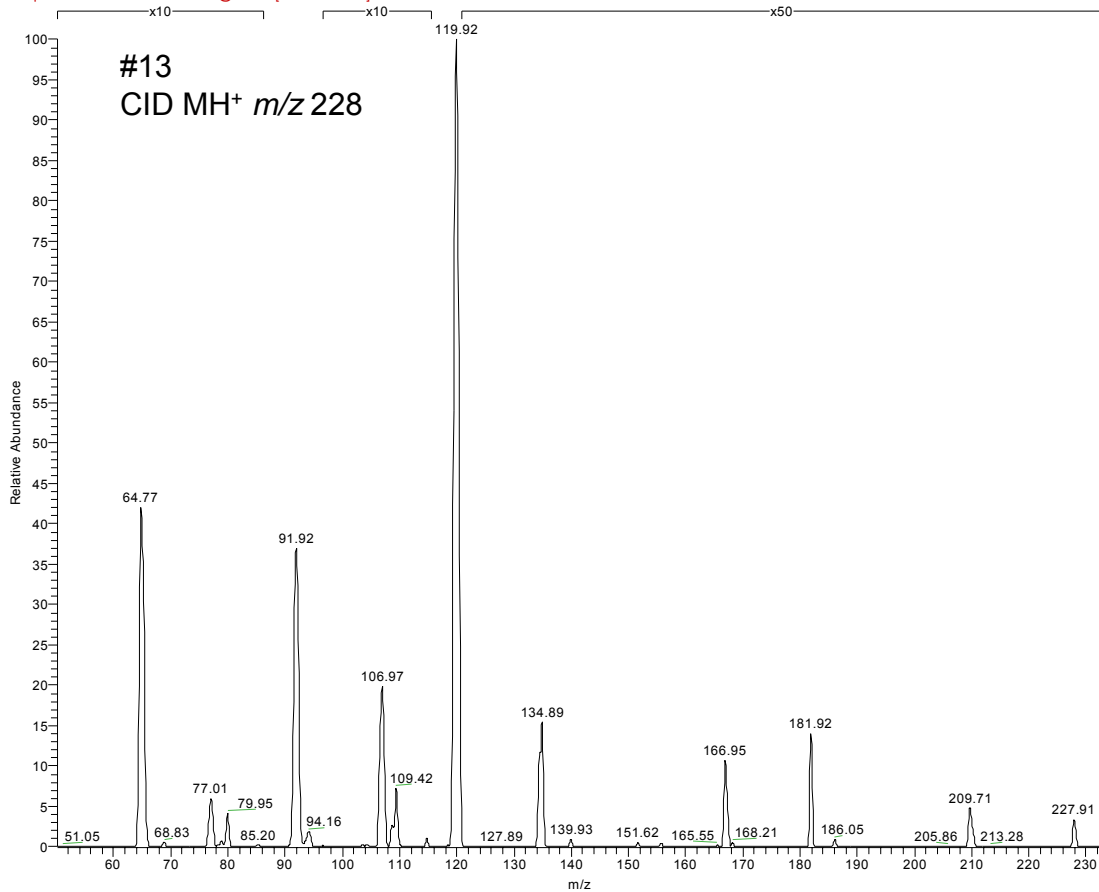

RT: 0.00 - 13.04 SM: 15G

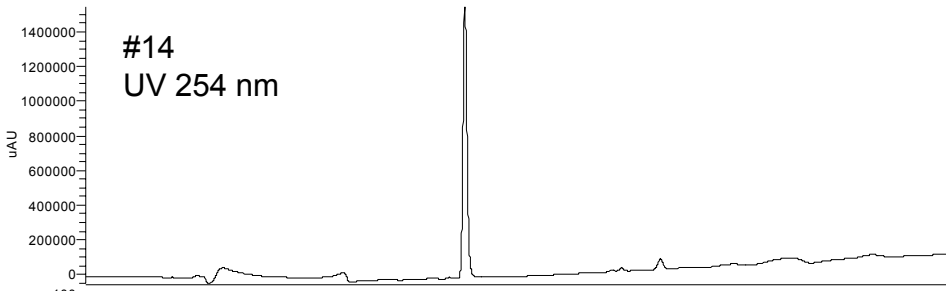

NL: 1.54E6  
Channel A UV  
08\_08\_2008\_UCSF\_PIS  
14\_080822173034

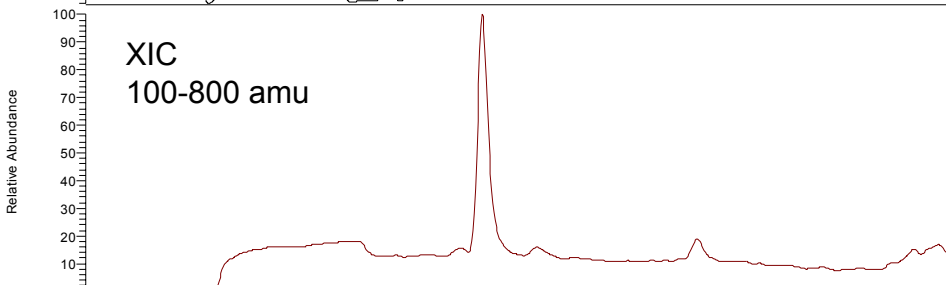

NL: 3.42E8  
m/z= 100.00-800.00 F: +  
p sld=-10.00 Q1MS [  
50.00-1200.00] MS  
08\_08\_2008\_UCSF\_PIS  
14\_080822173034

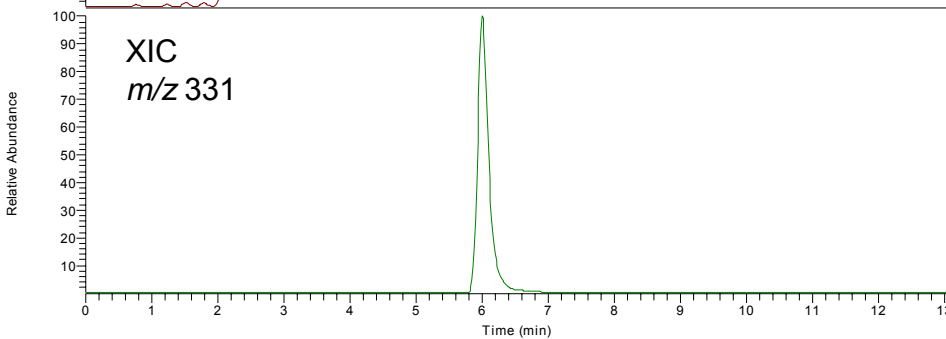

NL: 2.12E8  
m/z= 330.50-331.50 F: +  
p sld=-10.00 Q1MS [  
50.00-1200.00] MS  
08\_08\_2008\_UCSF\_PIS  
14\_080822173034

08\_08\_2008\_UCSF\_PIS14\_080821182445 #396-413 RT: 5.86-6.12 AV: 18 SB: 2 17.00, 17.00 SM: 15G NL: 3.20E7

F: + p sld=-10.00 Full ms2 331.10@-30.00 [ 50.00-700.00]

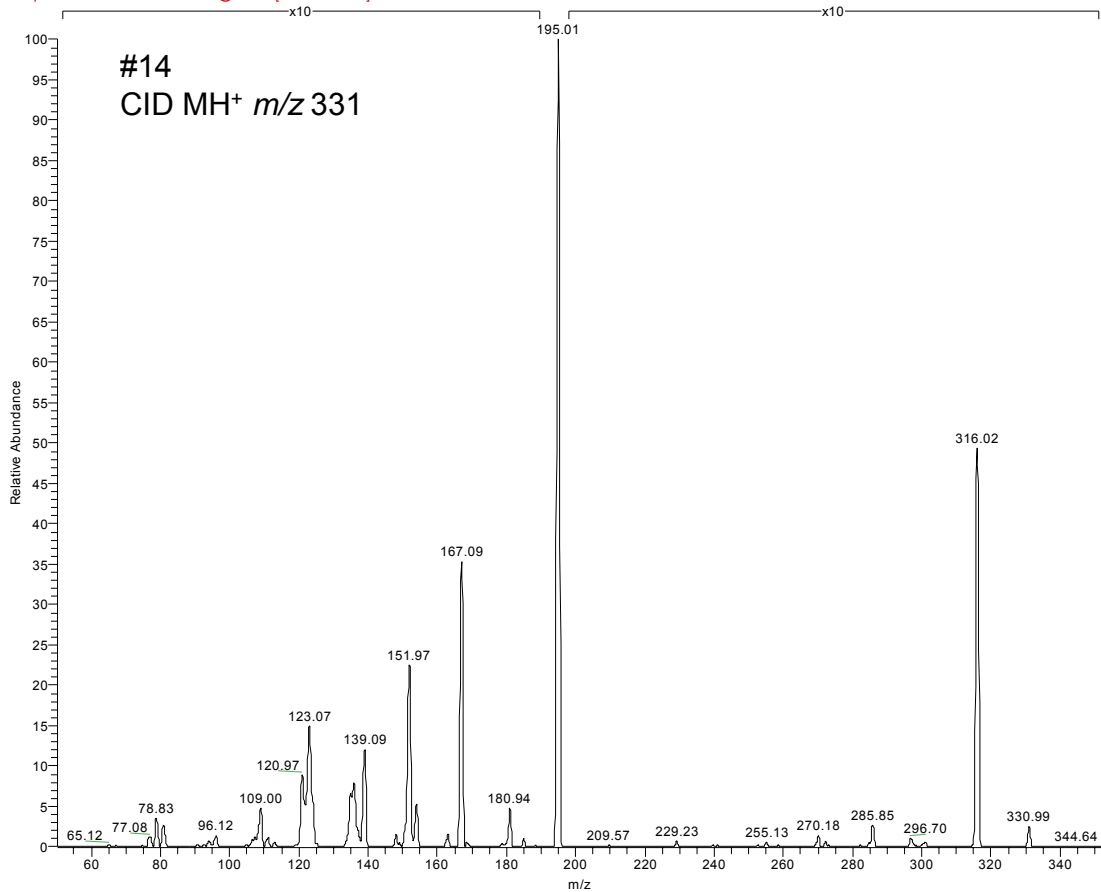

RT: 0.00 - 13.04 SM: 15G

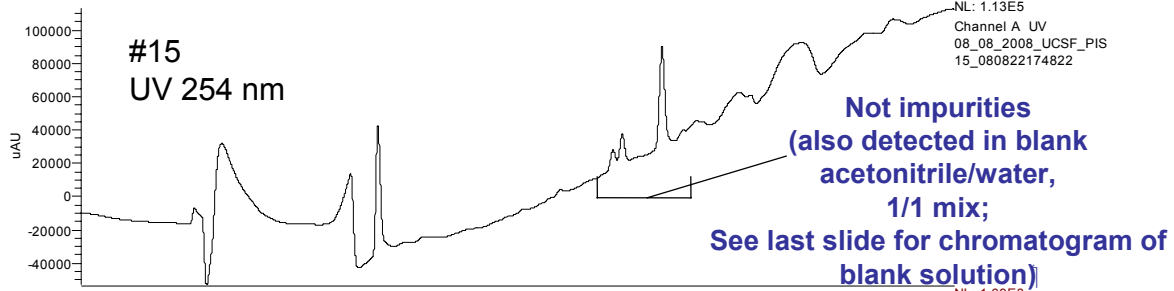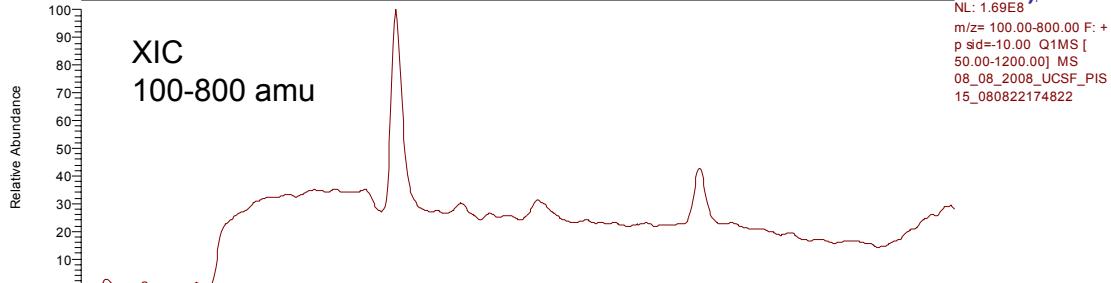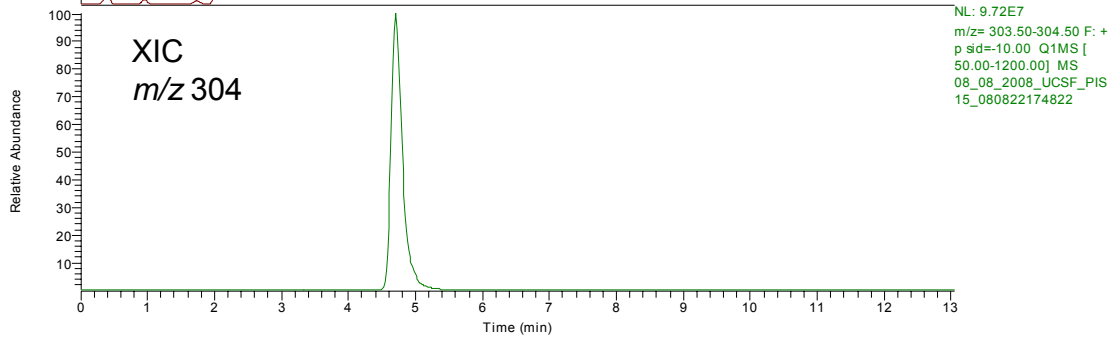

08\_08\_2008\_UCSF\_PIS15\_080821184233 #307-330 RT: 4.54-4.89 AV: 24 SB: 2 17.00, 17.00 SM: 15G NL: 5.50E6

F: + p sid=-10.00 Full ms2 304.10@-30.00 [ 50.00-700.00]

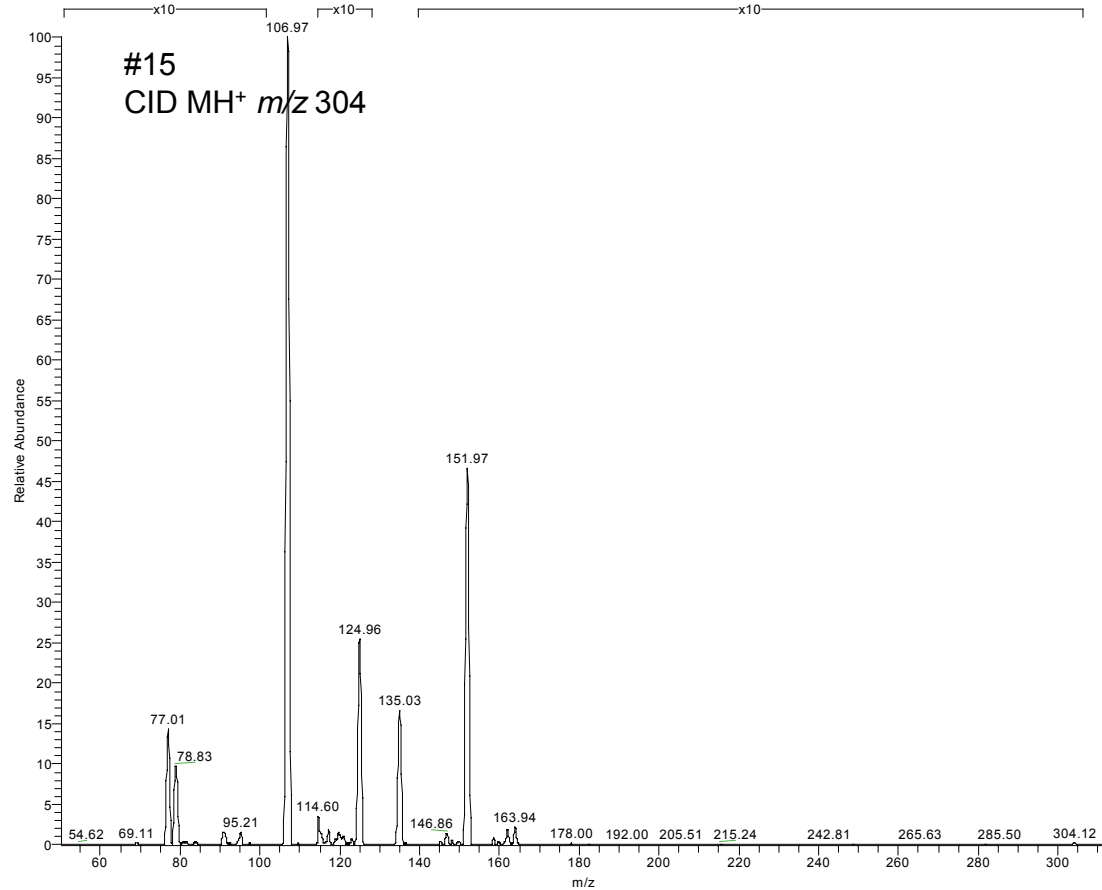

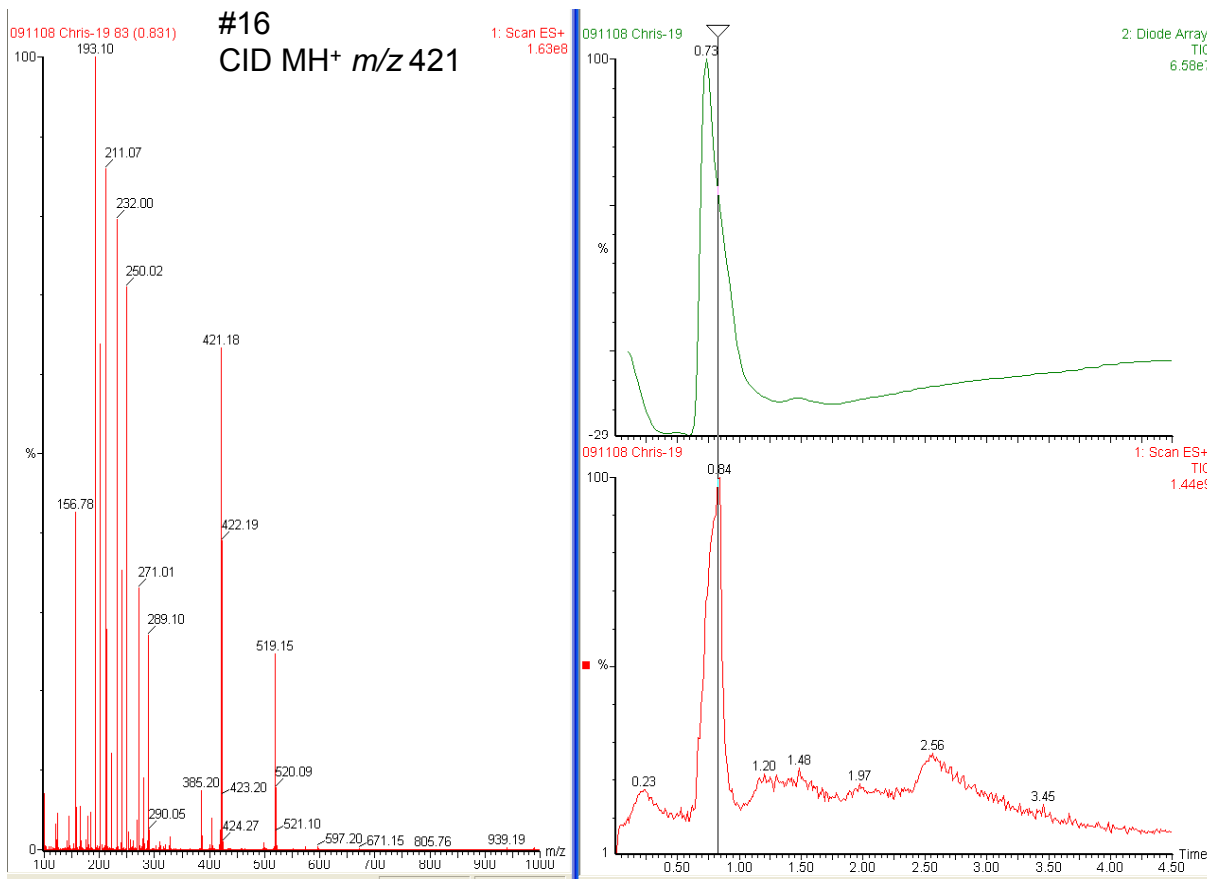

RT: 0.00 - 13.04 SM: 15G

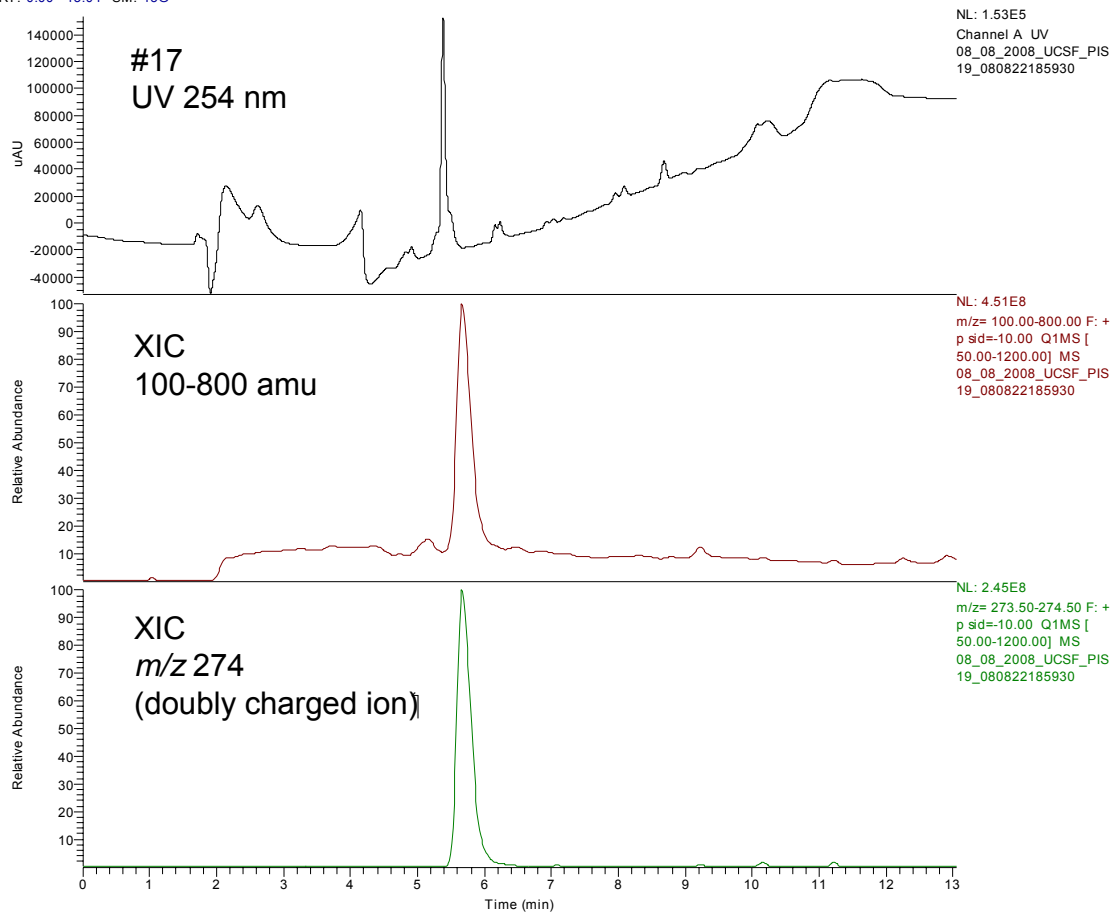

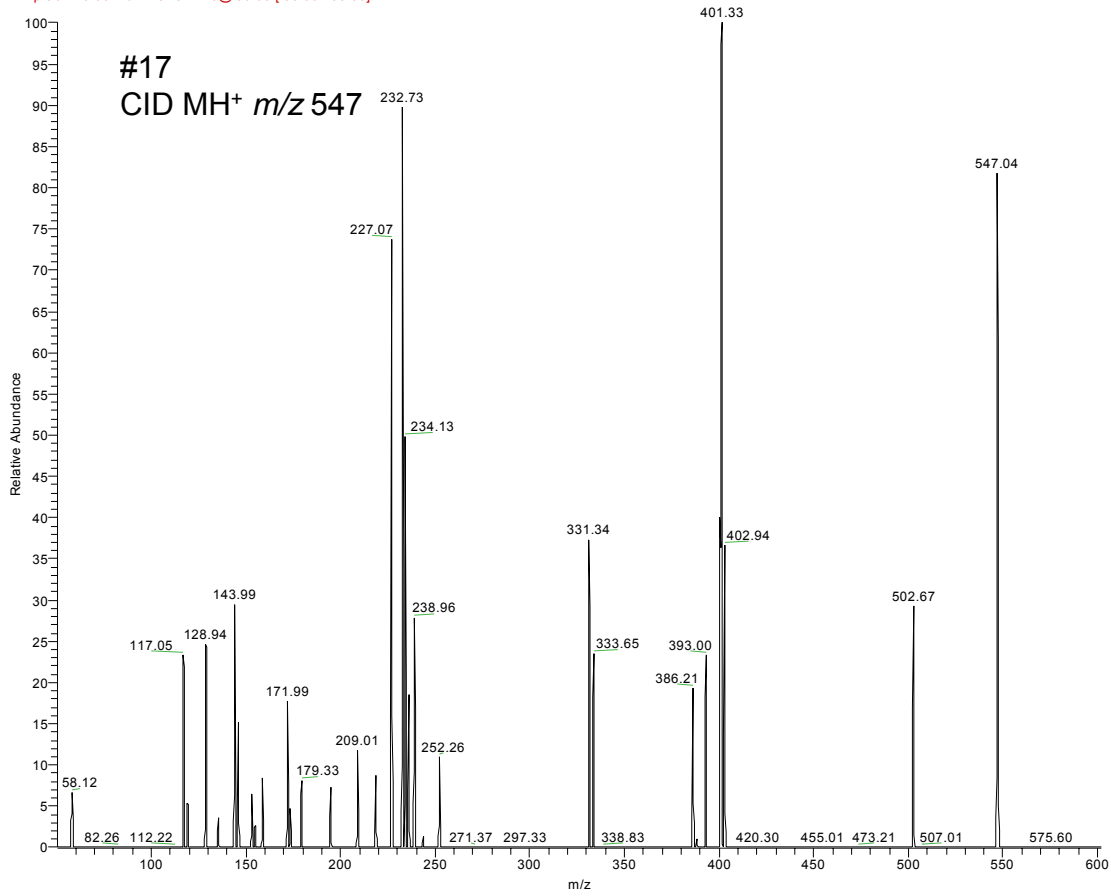

RT: 0.00 - 13.04 SM: 15G

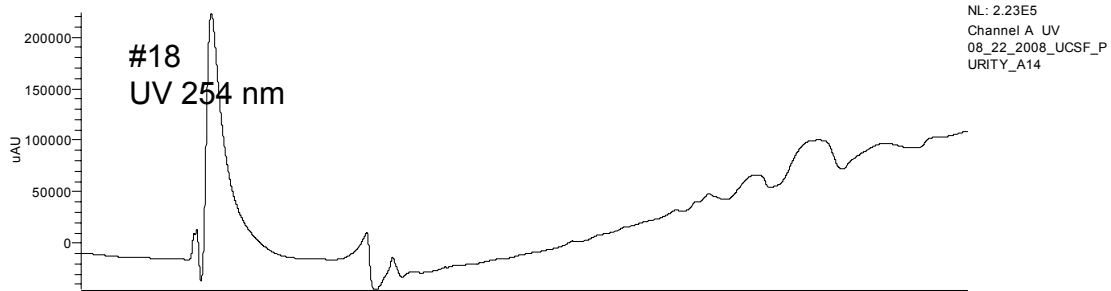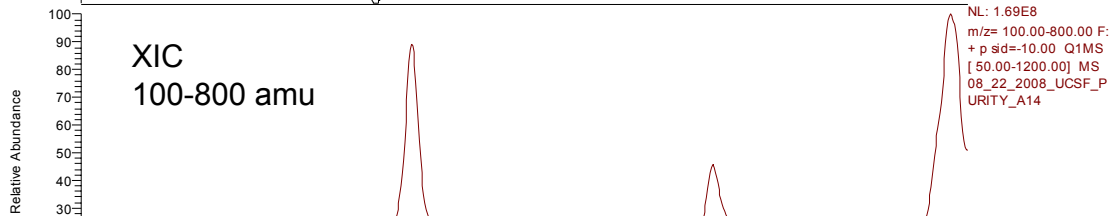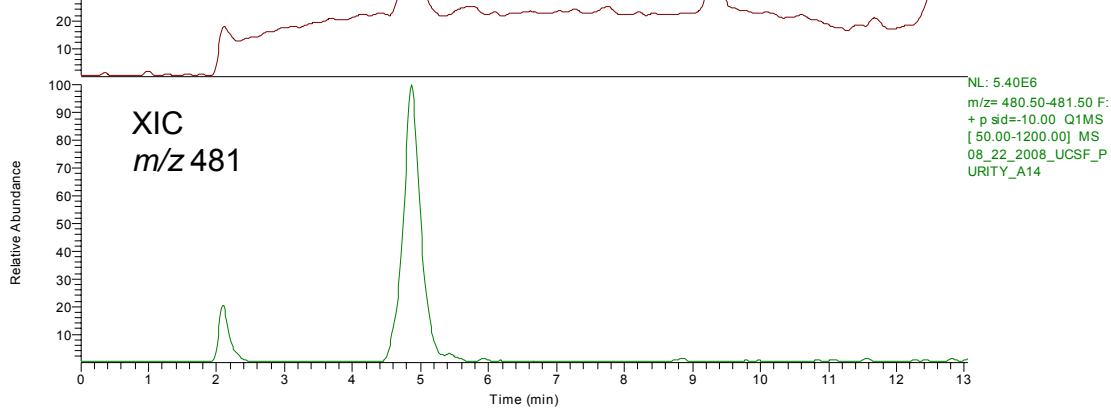



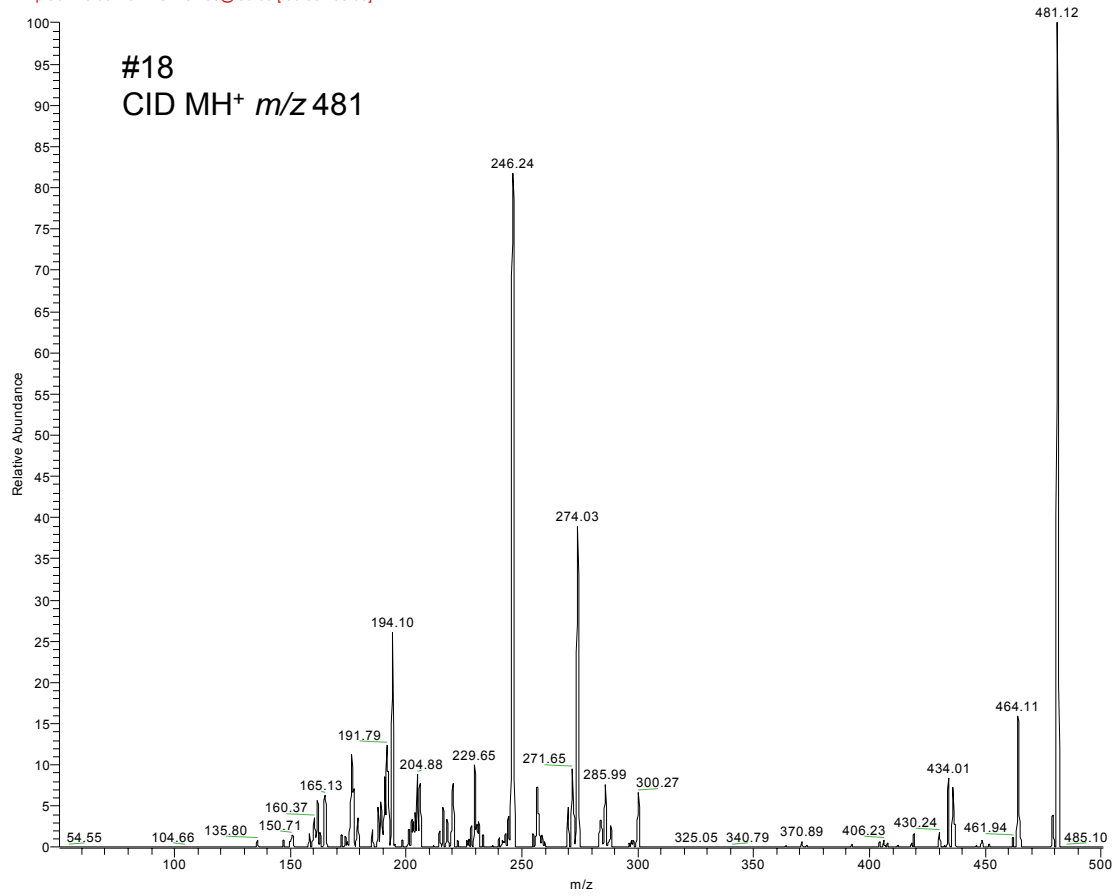

RT: 0.00 - 13.04 SM: 15G

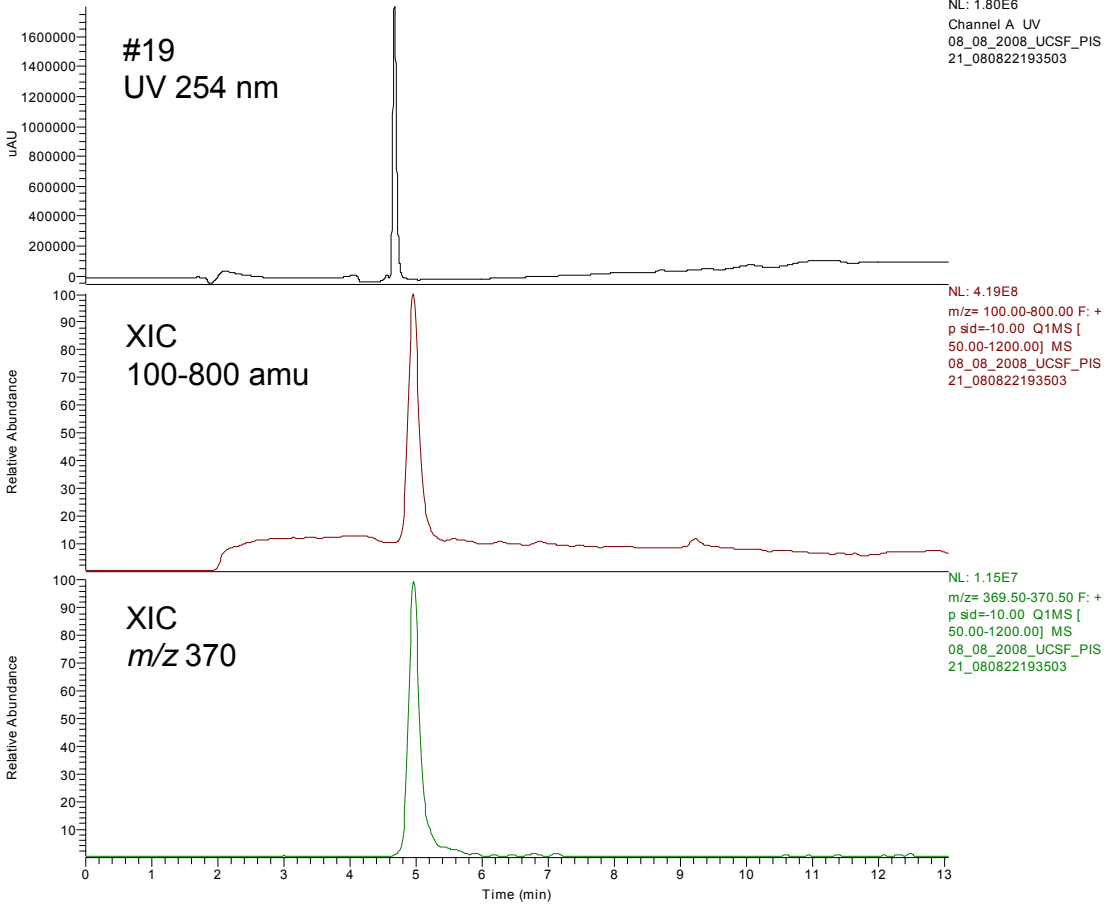

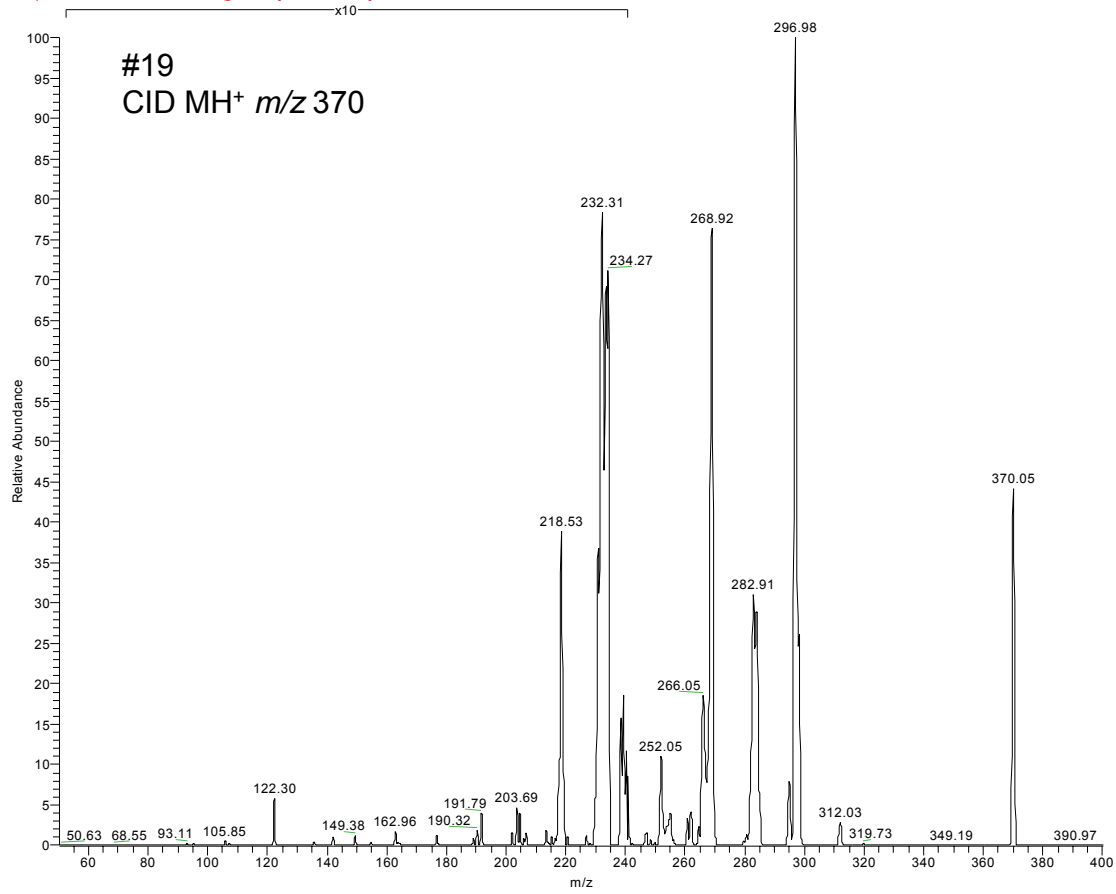

RT: 0.00 - 13.04 SM: 15G

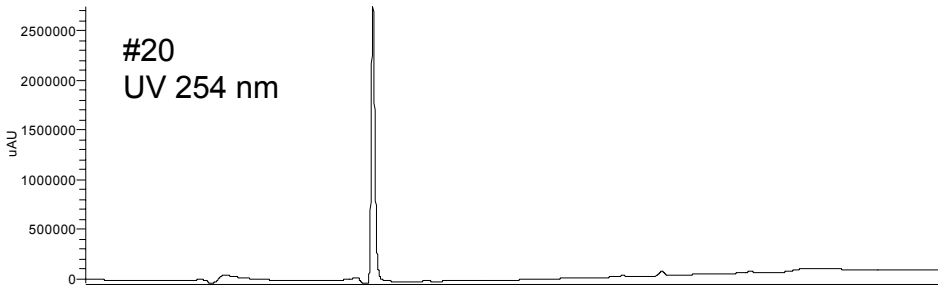

NL: 2.74E6  
Channel A UV  
08\_08\_2008\_UCSF\_PIS  
25\_080822195247

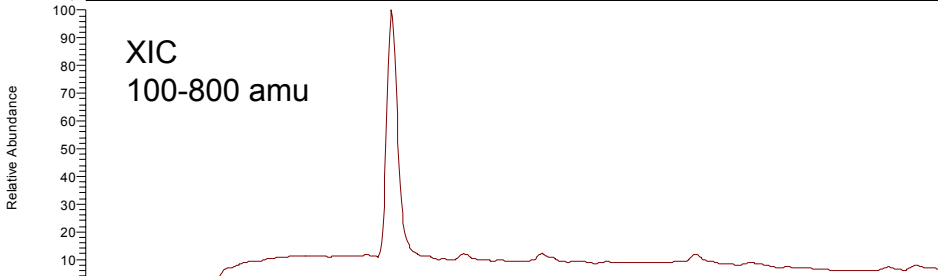

NL: 4.47E8  
m/z= 100.00-800.00 F: +  
p sid=-10.00 Q1MS [  
50.00-1200.00] MS  
08\_08\_2008\_UCSF\_PIS  
25\_080822195247

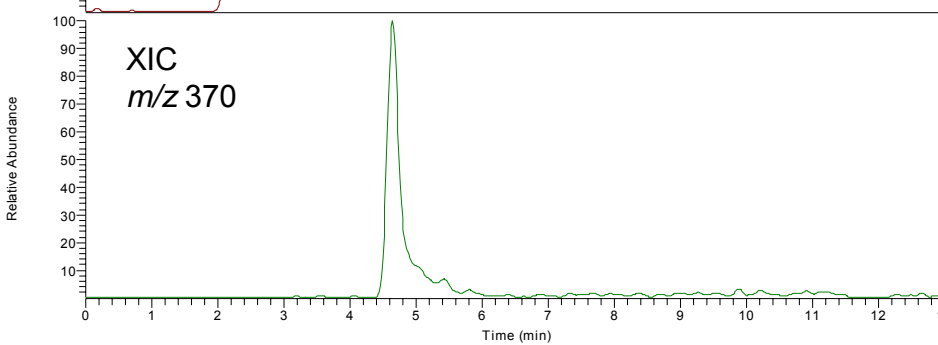

NL: 8.22E6  
m/z= 369.50-370.50 F: +  
p sid=-10.00 Q1MS [  
50.00-1200.00] MS  
08\_08\_2008\_UCSF\_PIS  
25\_080822195247

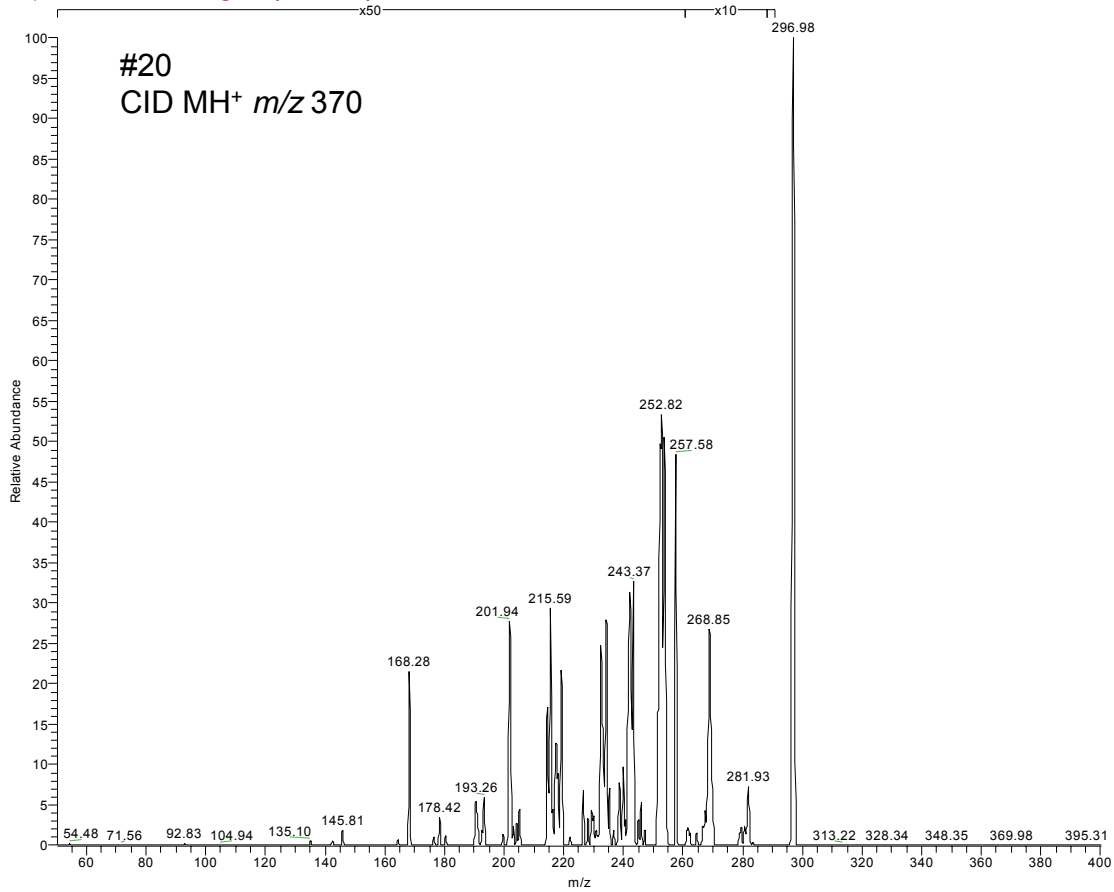

RT: 0.00 - 13.04 SM: 15G

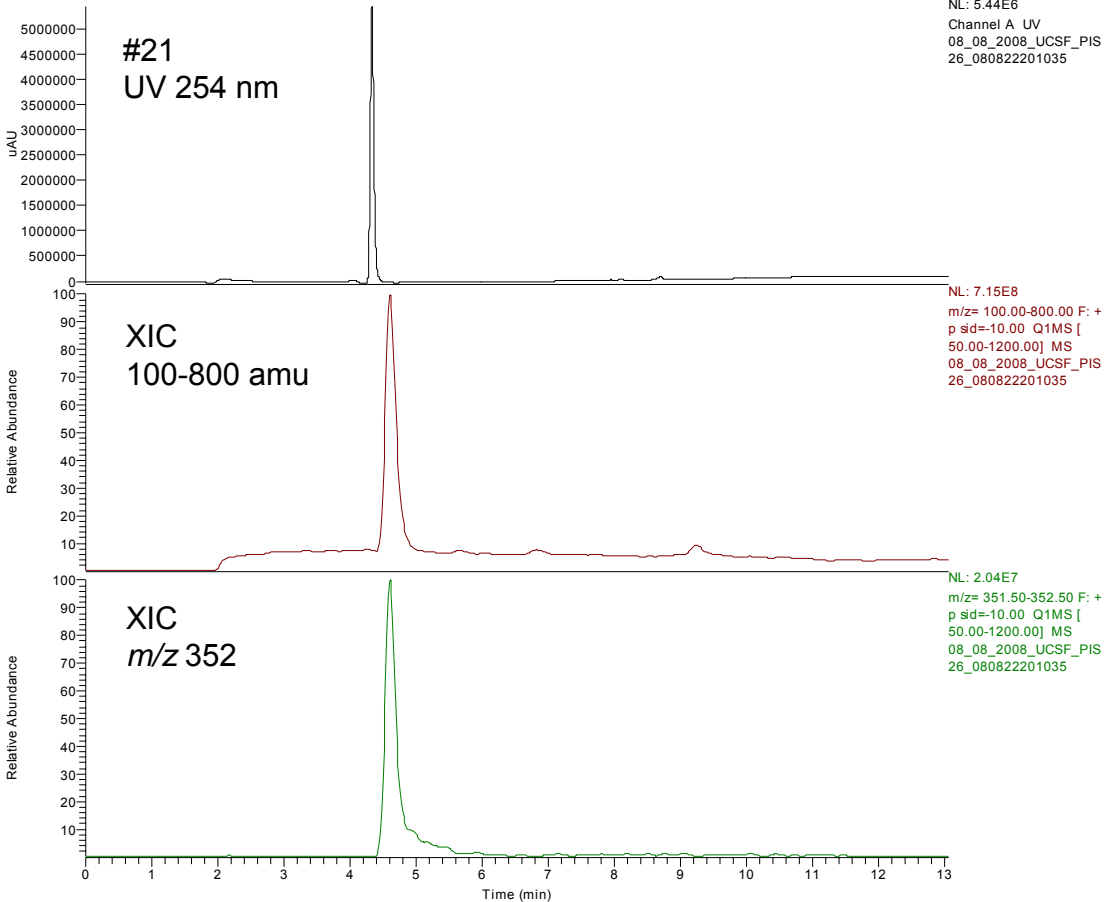

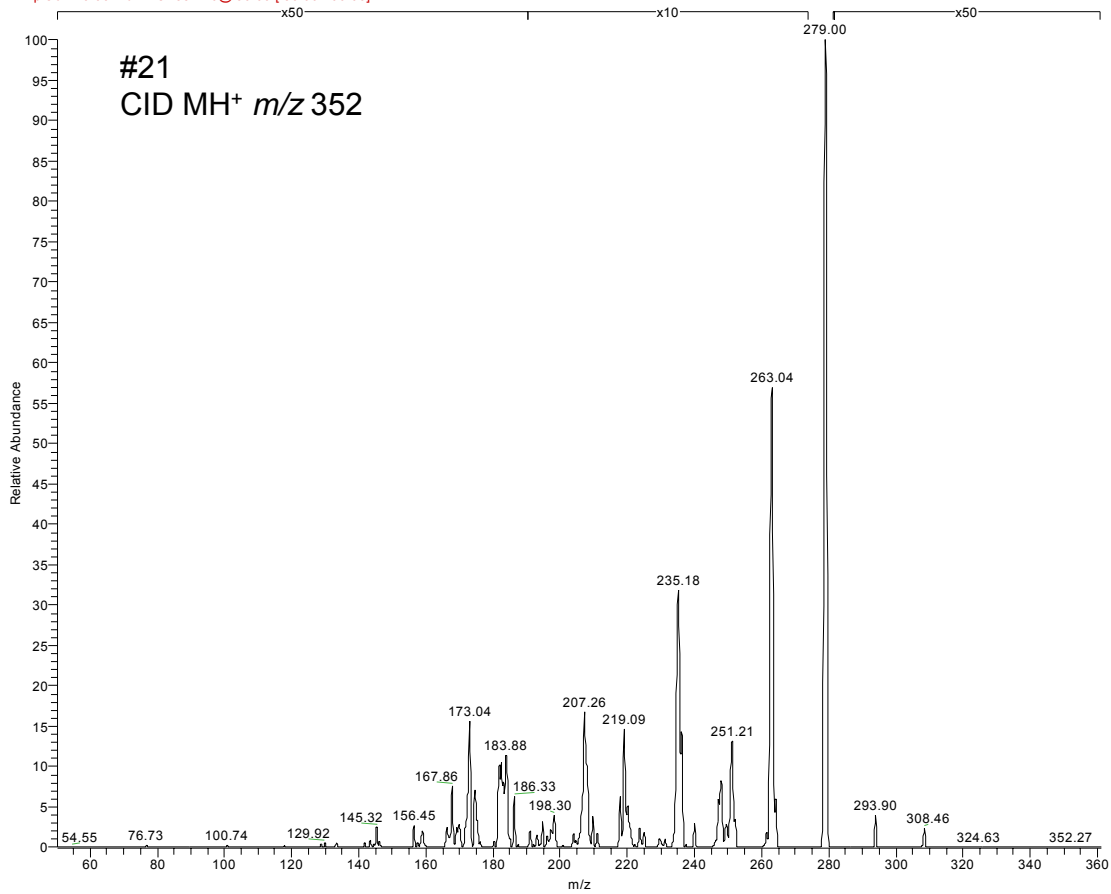

RT: 0.00 - 13.04 SM: 15G

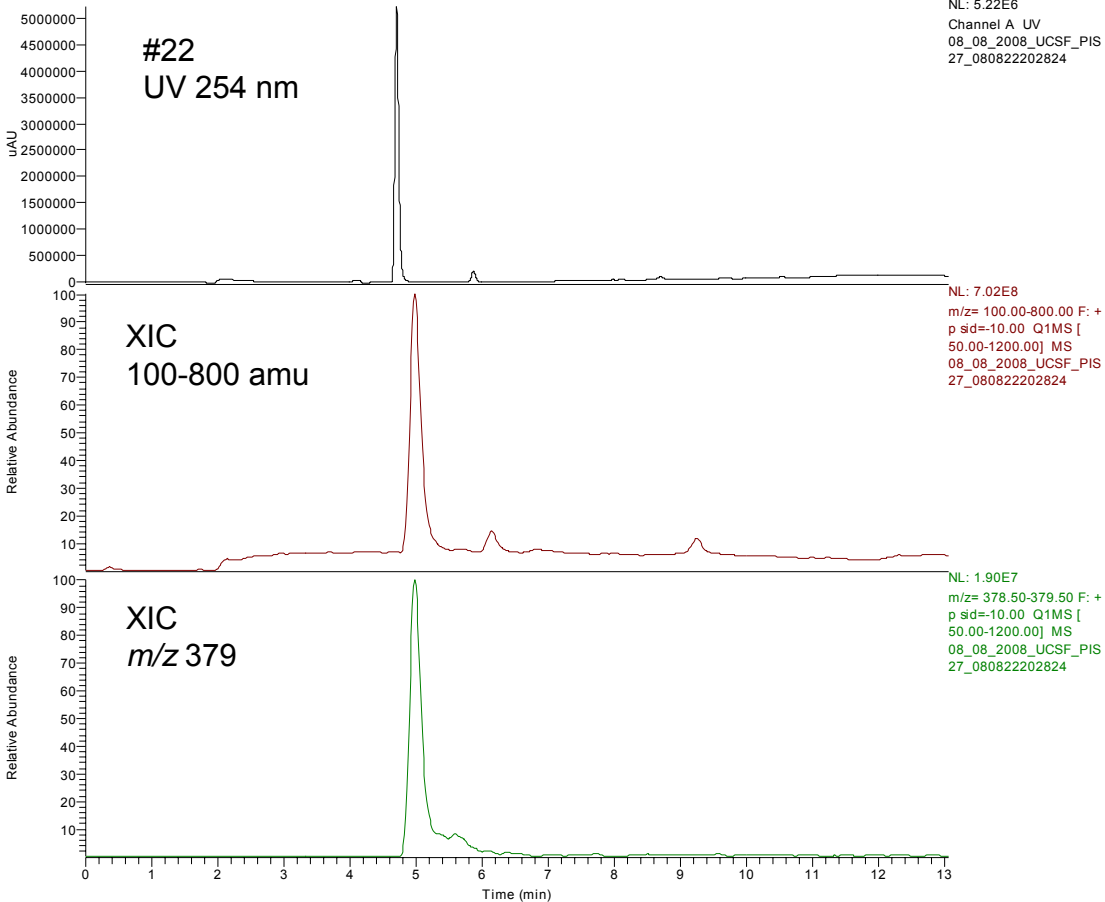

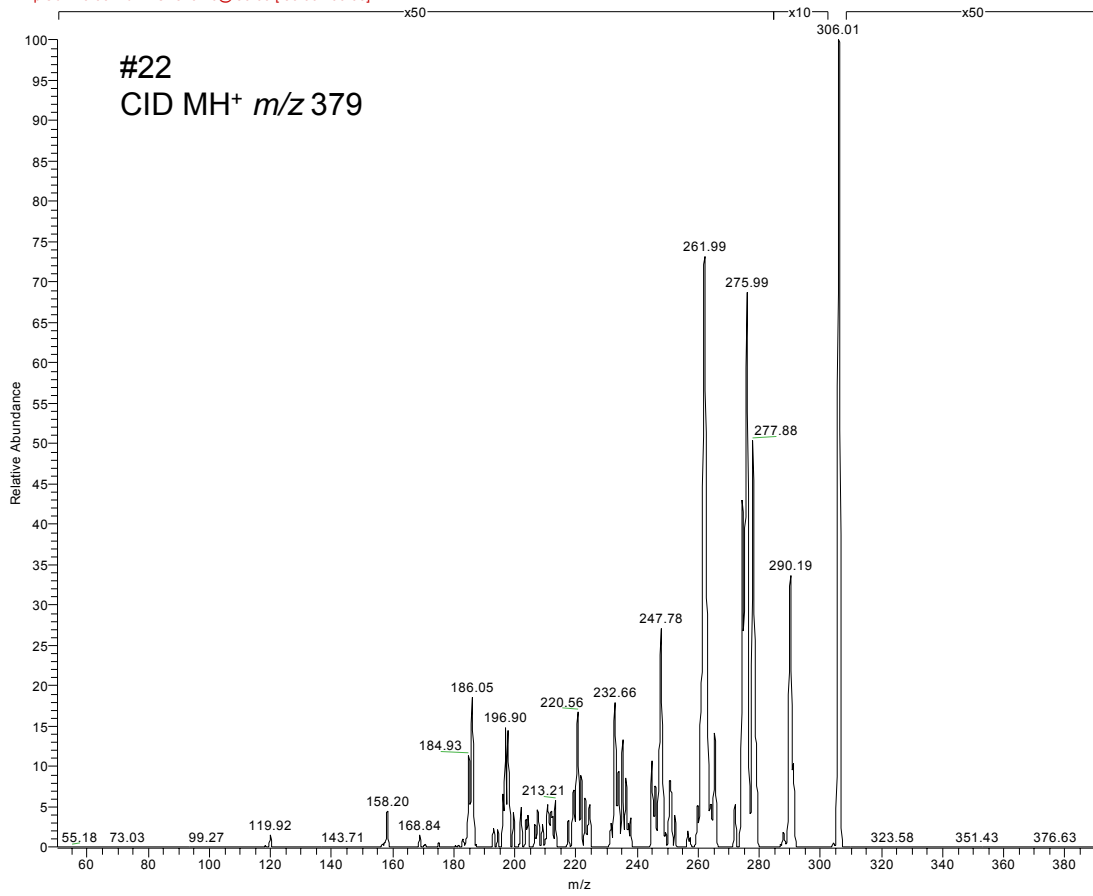

RT: 0.00 - 13.04 SM: 15G

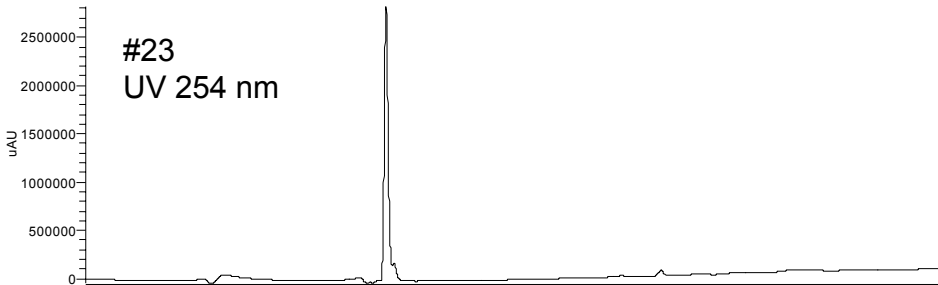

NL: 2.81E6  
Channel A UV  
08\_08\_2008\_UCSF\_PIS  
28\_080822204608

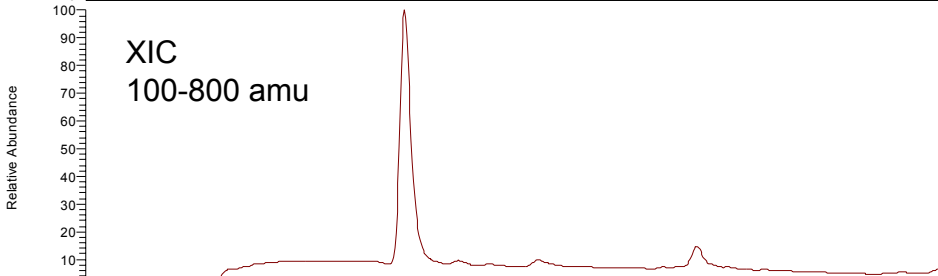

NL: 5.67E8  
m/z= 100.00-800.00 F: +  
p sid=-10.00 Q1MS [  
50.00-1200.00] MS  
08\_08\_2008\_UCSF\_PIS  
28\_080822204608

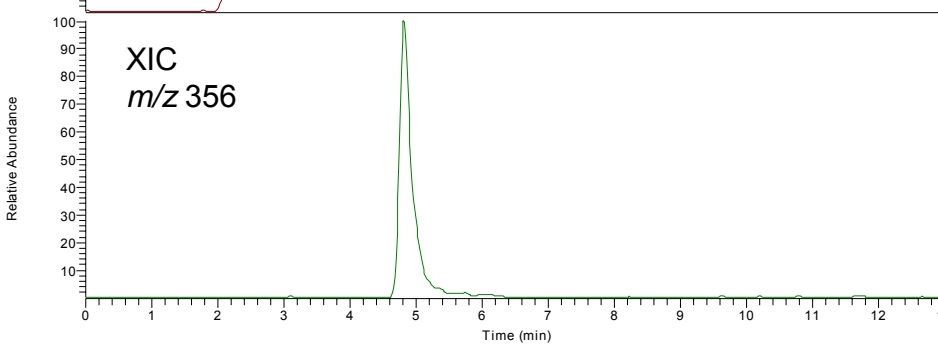

NL: 1.74E7  
m/z= 355.50-356.50 F: +  
p sid=-10.00 Q1MS [  
50.00-1200.00] MS  
08\_08\_2008\_UCSF\_PIS  
28\_080822204608

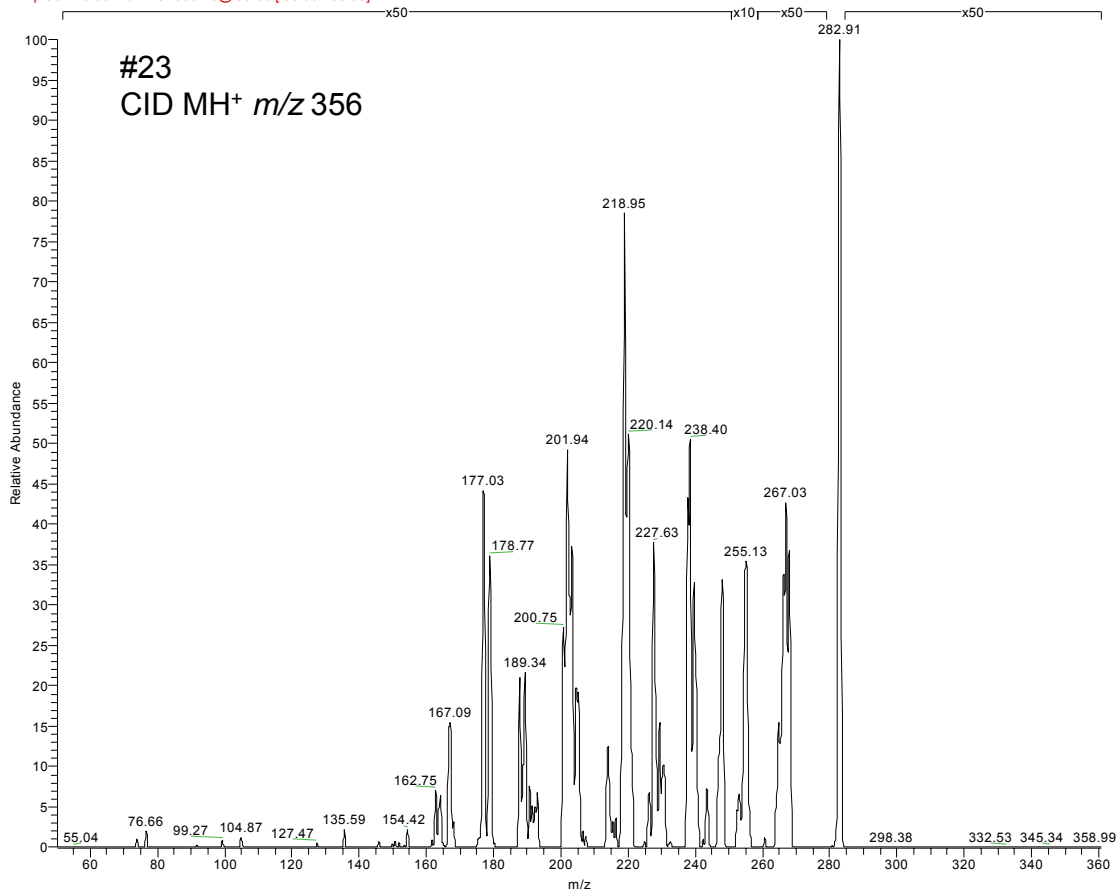

RT: 0.00 - 13.04 SM: 15G

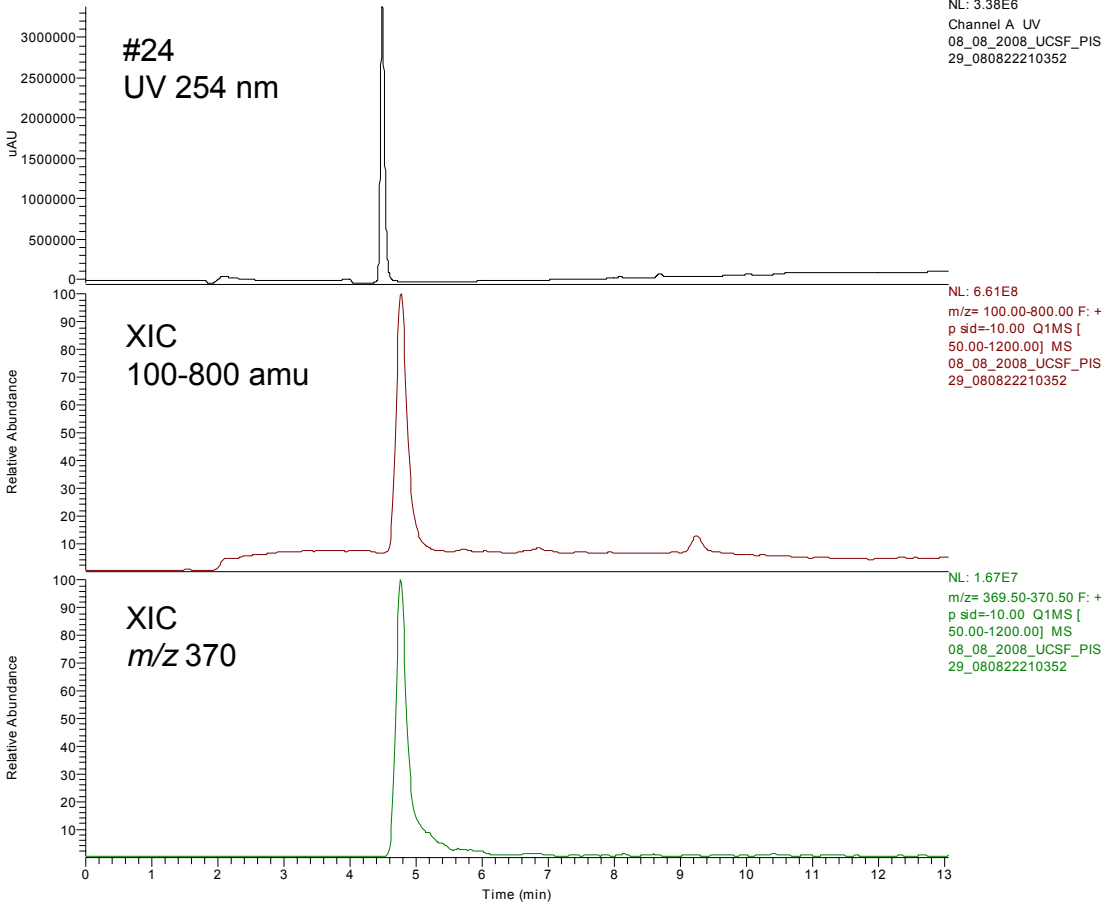

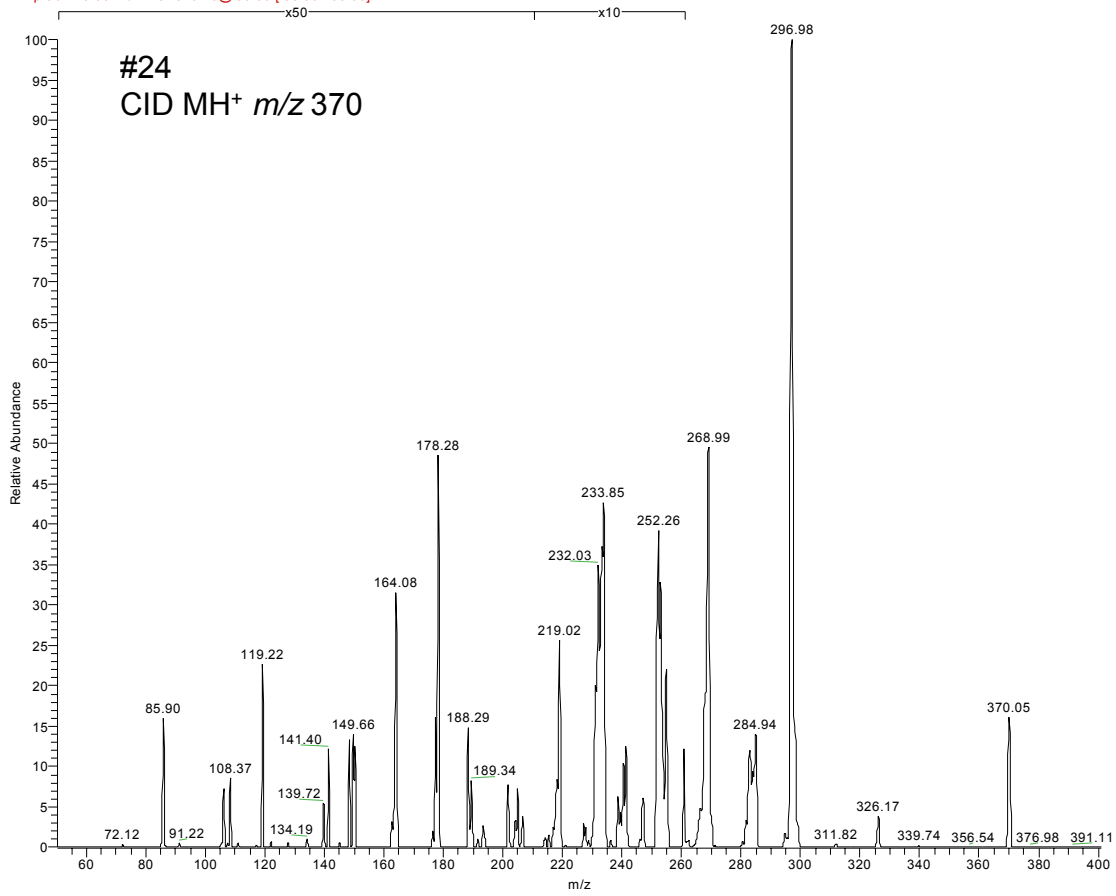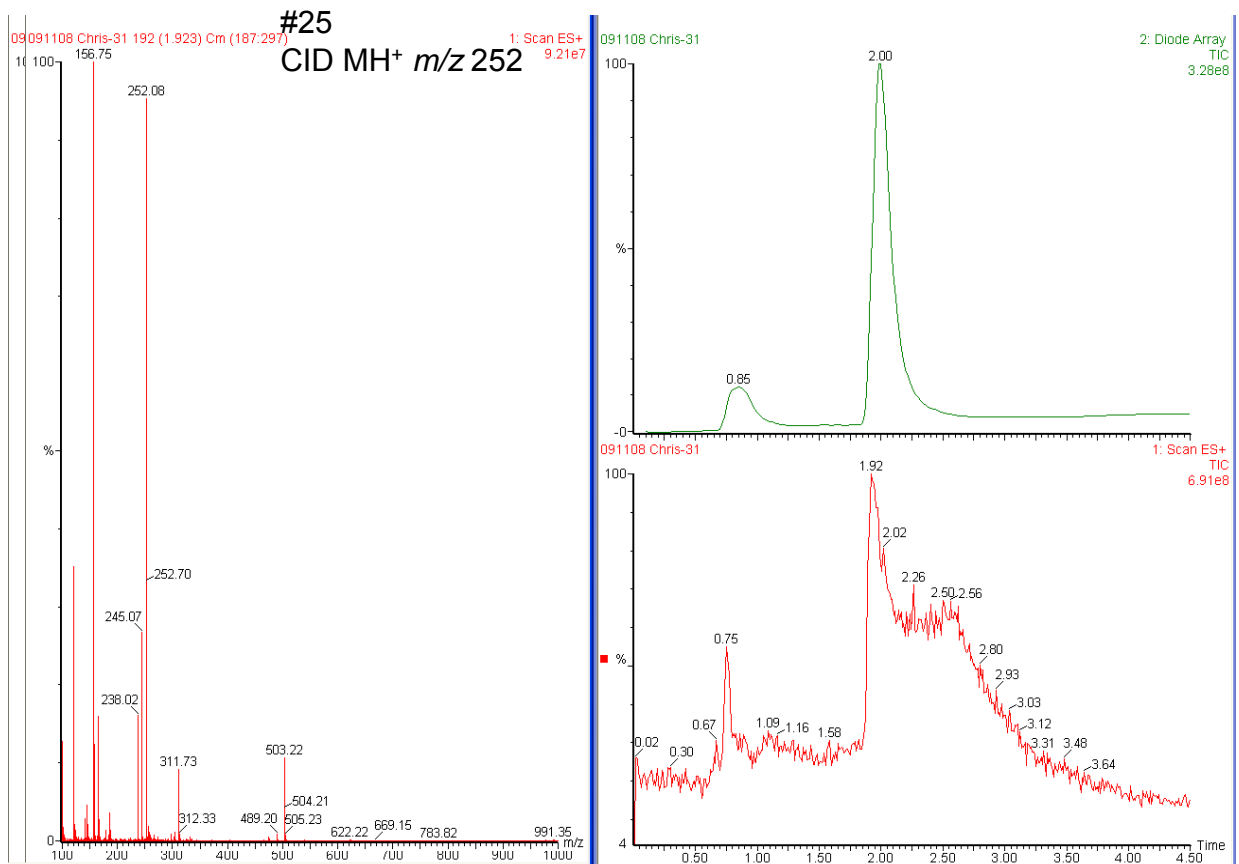

RT: 0.00 - 13.04 SM: 15G

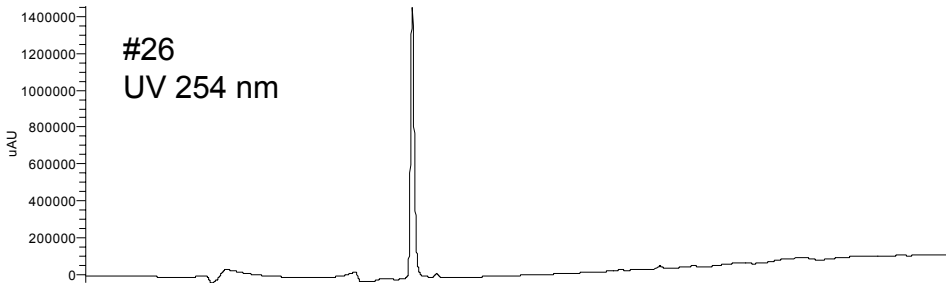

NL: 1.45E6  
Channel A UV  
08\_08\_2008\_UCSF\_PIS  
32\_080822215713

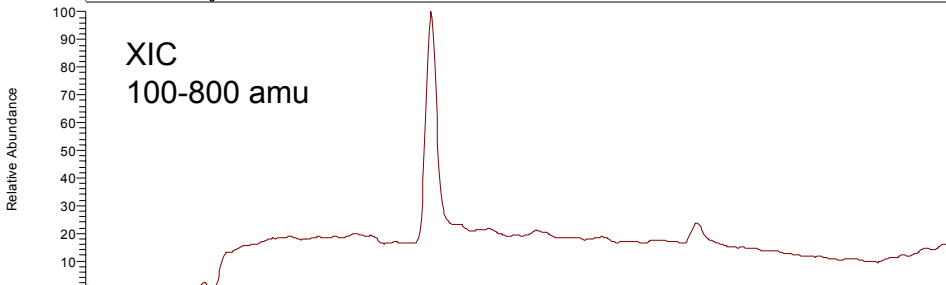

NL: 2.78E8  
m/z= 100.00-800.00 F: +  
p sid=-10.00 Q1MS [  
50.00-1200.00] MS  
08\_08\_2008\_UCSF\_PIS  
32\_080822215713

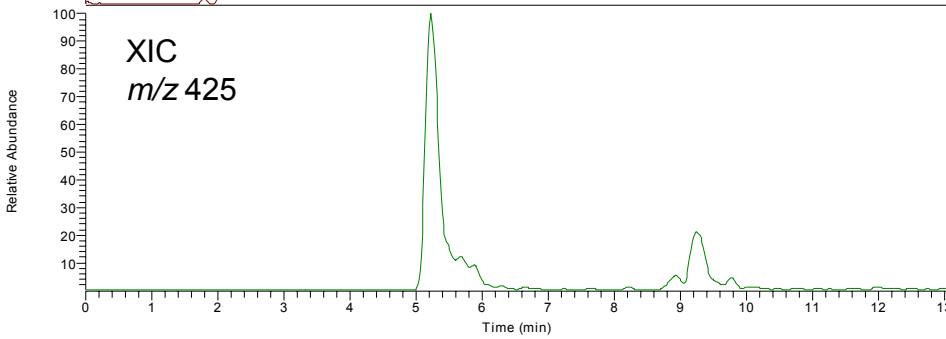

NL: 5.22E6  
m/z= 424.50-425.50 F: +  
p sid=-10.00 Q1MS [  
50.00-1200.00] MS  
08\_08\_2008\_UCSF\_PIS  
32\_080822215713

08\_08\_2008\_UCSF\_PIS32\_080821225118 #345-357 RT: 5.11-5.29 AV: 13 SB: 520 0.84-4.37, 5.87-10.02 SM: 15G NL: 1.94E6  
F: + p sid=-10.00 Full ms2 425.10@-30.00 [ 50.00-700.00]

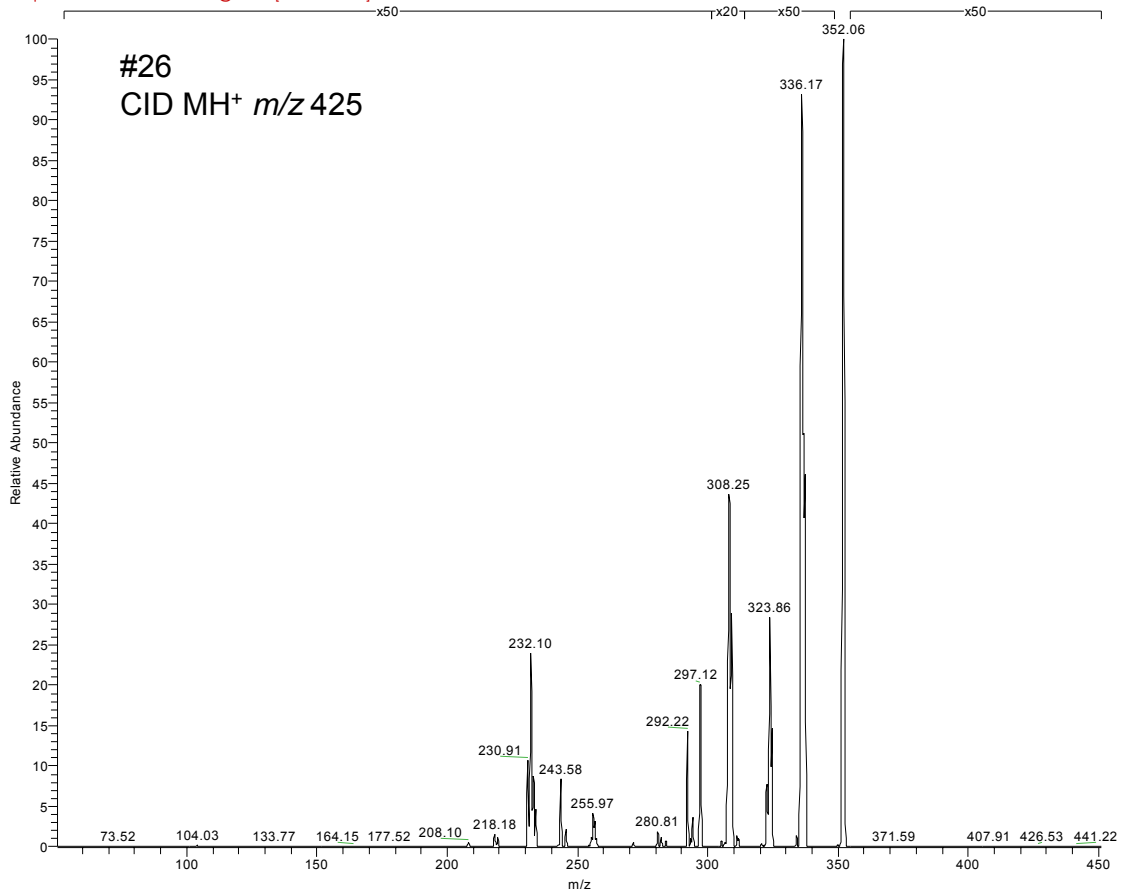



RT: 0.00 - 13.04 SM: 15G

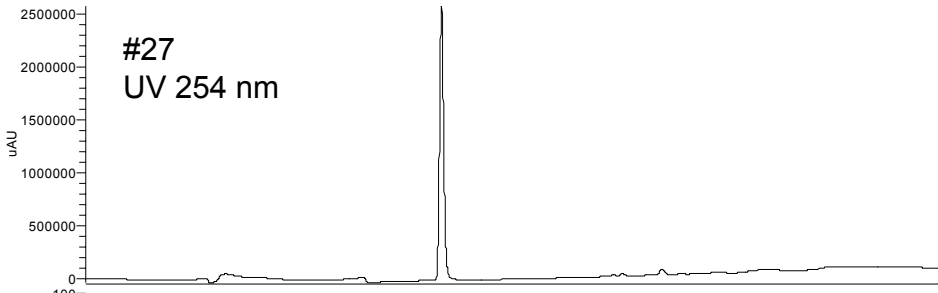

NL: 2.57E6  
Channel A UV  
08\_08\_2008\_UCSF\_PIS  
37\_080822223243

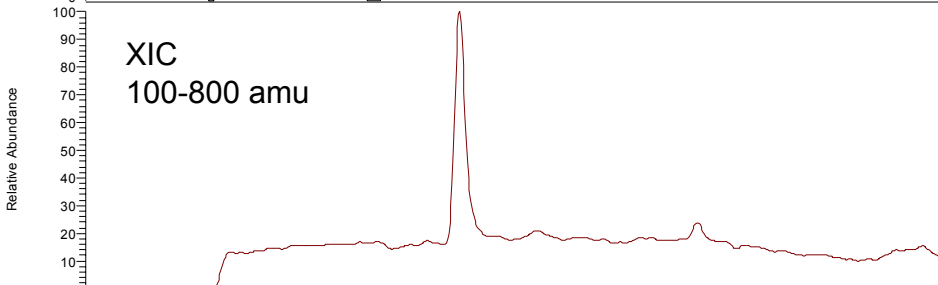

NL: 3.32E8  
m/z= 100.00-800.00 F: +  
p sid=-10.00 Q1MS [  
50.00-1200.00] MS  
08\_08\_2008\_UCSF\_PIS  
37\_080822223243

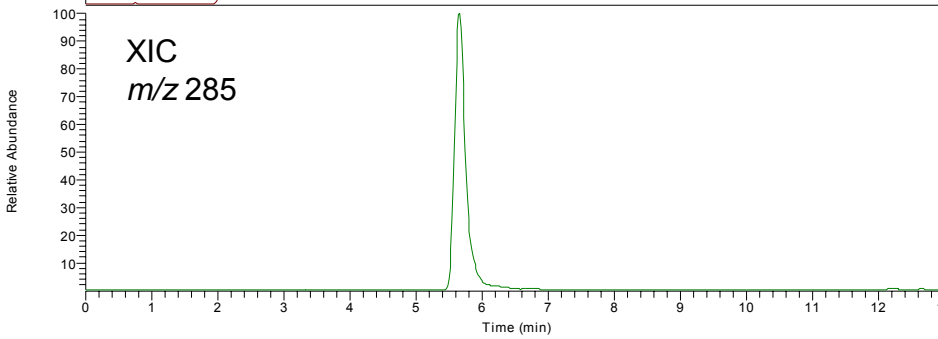

NL: 1.67E8  
m/z= 284.50-285.50 F: +  
p sid=-10.00 Q1MS [  
50.00-1200.00] MS  
08\_08\_2008\_UCSF\_PIS  
37\_080822223243

08\_08\_2008\_UCSF\_PIS37\_080821232653 #371-394 RT: 5.50-5.84 AV: 24 SB: 520 0.84-4.37, 5.87-10.02 SM: 15G NL: 9.71E6  
F: + p sid=-10.00 Full ms2 285.10@-30.00 [ 50.00-700.00]

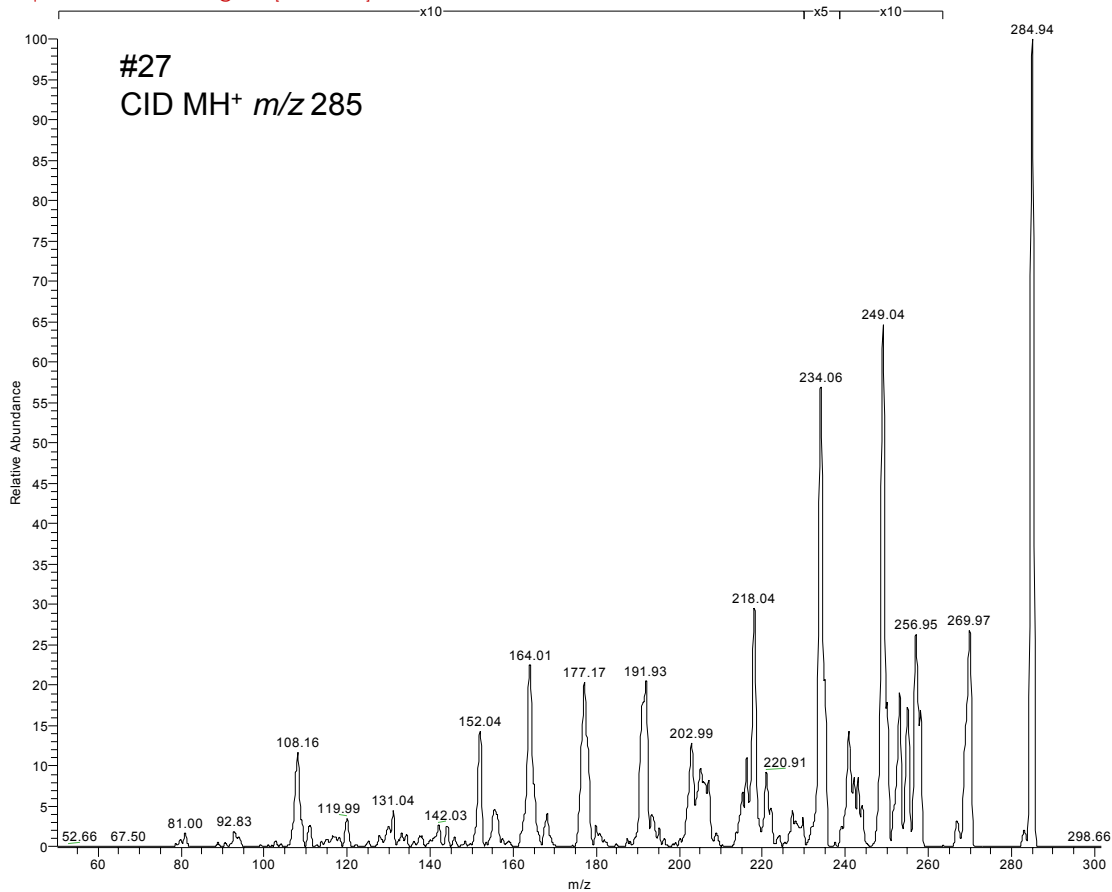

RT: 0.00 - 13.04 SM: 15G

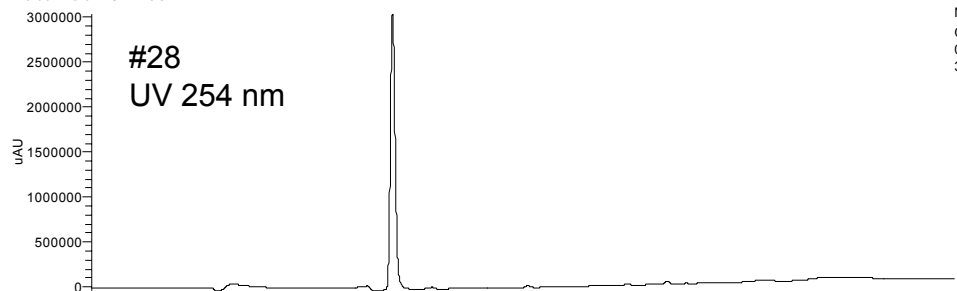

NL: 3.03E6  
Channel A UV  
08\_08\_2008\_UCSF\_PIS  
31\_080822213928

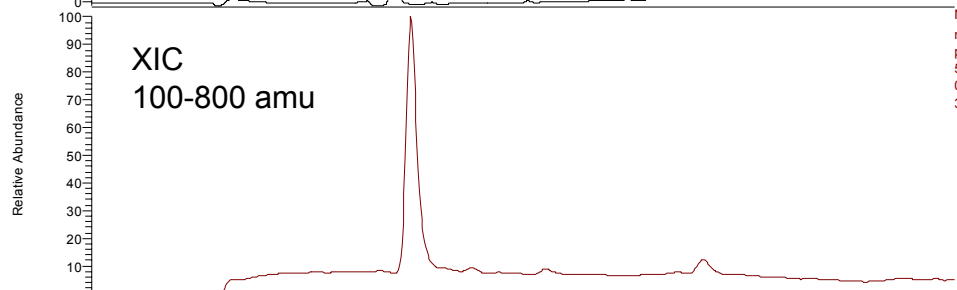

NL: 6.38E8  
m/z= 100.00-800.00 F: +  
p sid=-10.00 Q1MS [  
50.00-1200.00] MS  
08\_08\_2008\_UCSF\_PIS  
31\_080822213928

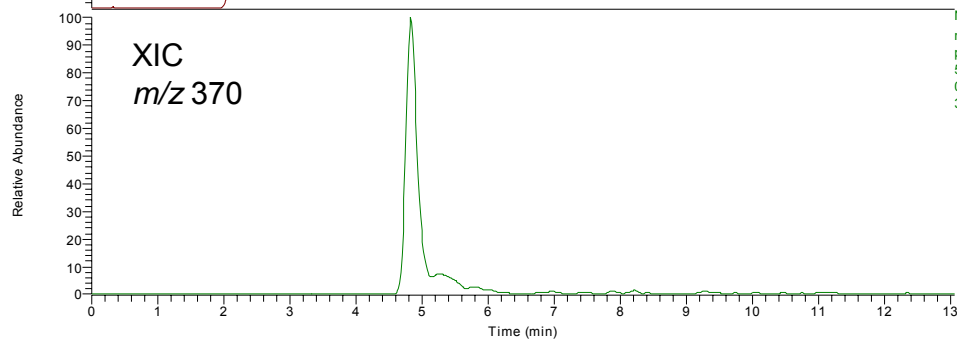

NL: 1.51E7  
m/z= 369.50-370.50 F: +  
p sid=-10.00 Q1MS [  
50.00-1200.00] MS  
08\_08\_2008\_UCSF\_PIS  
31\_080822213928

08\_08\_2008\_UCSF\_PIS31\_080821223330 #310-325 RT: 4.59-4.81 AV: 16 SB: 520 0.84-4.37, 5.86-10.02 SM: 15G NL: 3.12E6  
F: + p sid=-10.00 Full ms2 370.10@-30.00 [ 50.00-700.00]

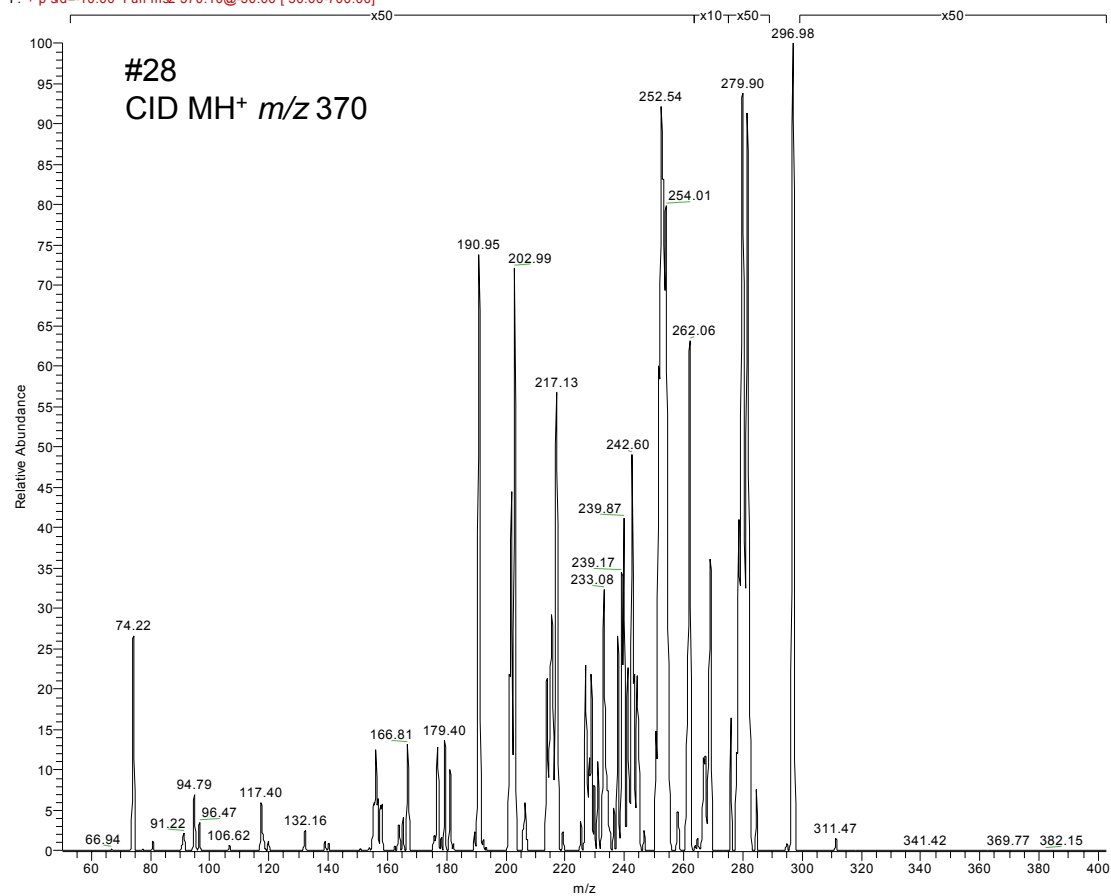

RT: 0.00 - 13.04 SM: 15G

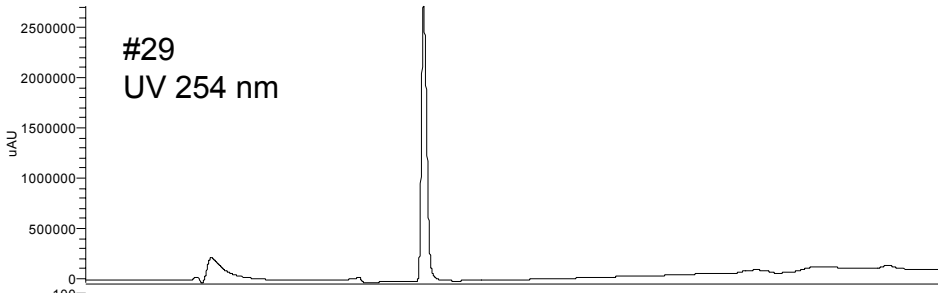

NL: 2.71E6  
Channel A UV  
08\_22\_2008\_UCSF\_PURI  
TY\_A17\_080824155413

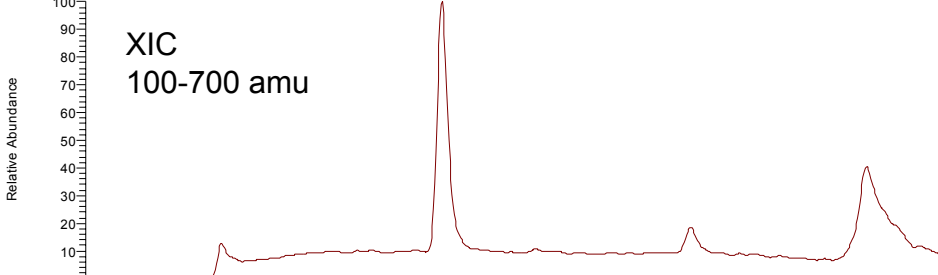

NL: 4.62E8  
m/z= 100.00-800.00 F: +  
p sd=-10.00 Q1MS [  
50.00-1200.00] MS  
08\_22\_2008\_UCSF\_PURI  
TY\_A17\_080824155413

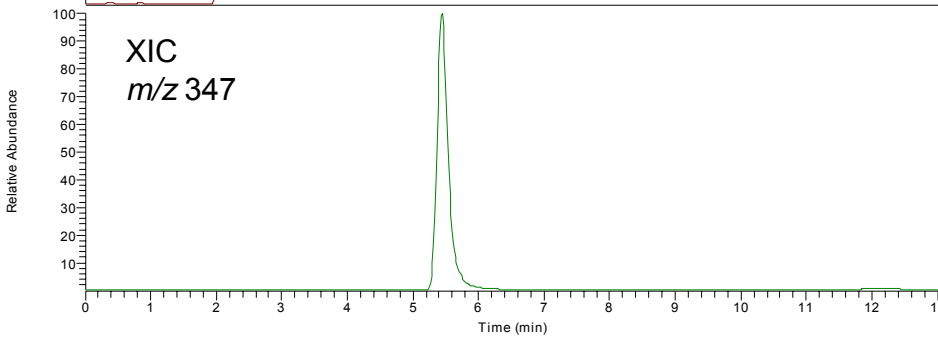

NL: 3.15E8  
m/z= 346.50-347.50 F: +  
p sd=-10.00 Q1MS [  
50.00-1200.00] MS  
08\_22\_2008\_UCSF\_PURI  
TY\_A17\_080824155413

08\_22\_2008\_UCSF\_PURITY\_A17\_080824230046 #359-383 RT: 5.32-5.67 AV: 25 SB: 2 0.01, 0.01 SM: 15G NL: 2.76E7  
F: + p sd=-10.00 Full ms2 347.10@-30.00 [ 50.00-700.00]

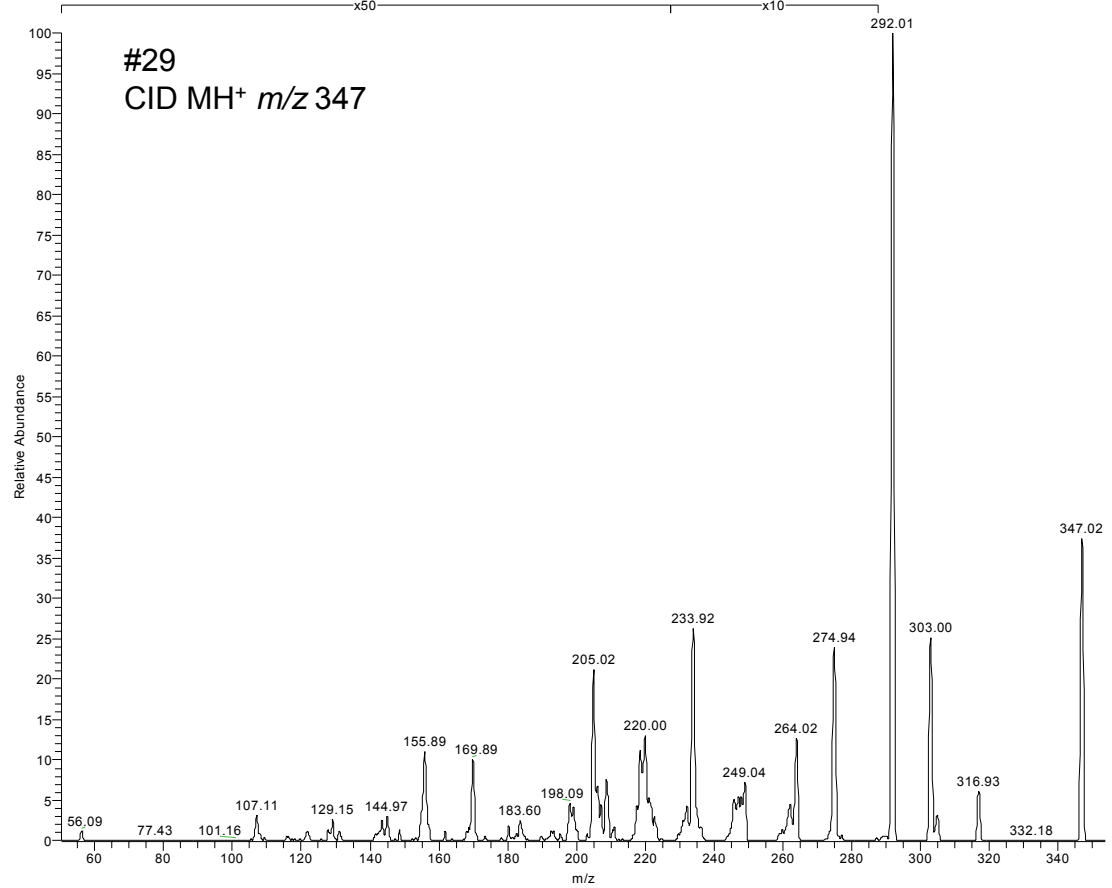

RT: 0.00 - 13.04 SM: 15G

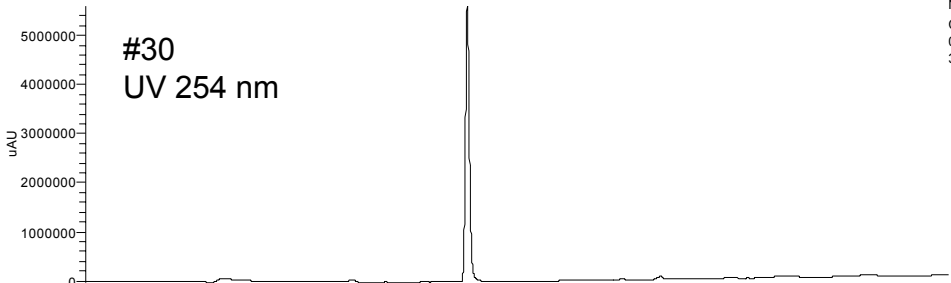

NL: 5.59E6  
Channel A UV  
08\_08\_2008\_UCSF\_PIS  
39\_080822230814

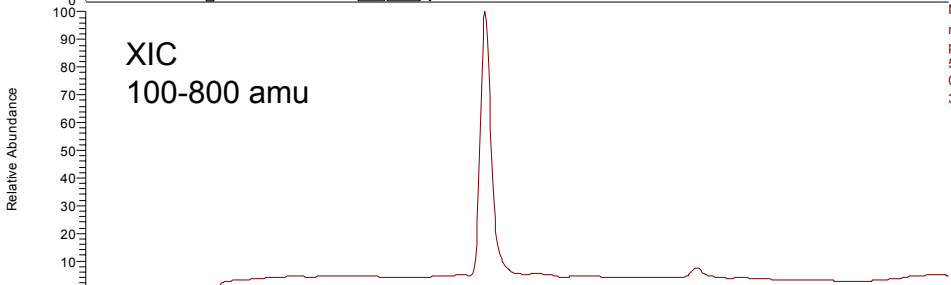

NL: 1.04E9  
m/z= 100.00-800.00 F: +  
p sid=-10.00 Q1MS [  
50.00-1200.00] MS  
08\_08\_2008\_UCSF\_PIS  
39\_080822230814

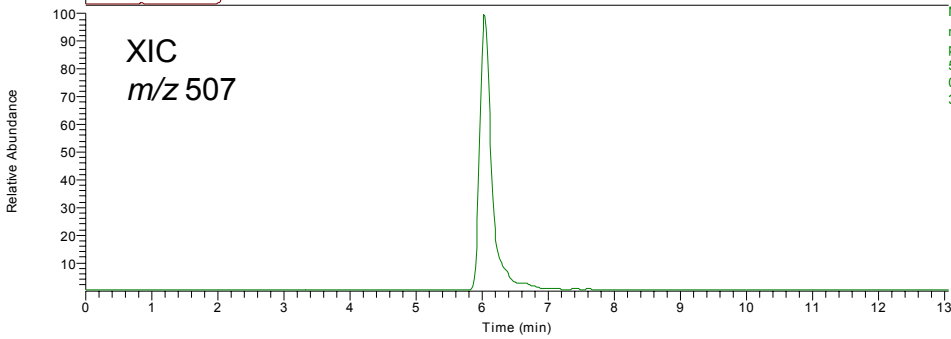

NL: 7.80E7  
m/z= 506.50-507.50 F: +  
p sid=-10.00 Q1MS [  
50.00-1200.00] MS  
08\_08\_2008\_UCSF\_PIS  
39\_080822230814

08\_08\_2008\_UCSF\_PIS39\_08082200225 #397-413 RT: 5.88-6.12 AV: 17 SB: 520 0.84-4.37, 5.86-10.02 SM: 15G NL: 3.06E6  
F: + p sid=-10.00 Full ms2 507.10@-30.00 [ 50.00-700.00]

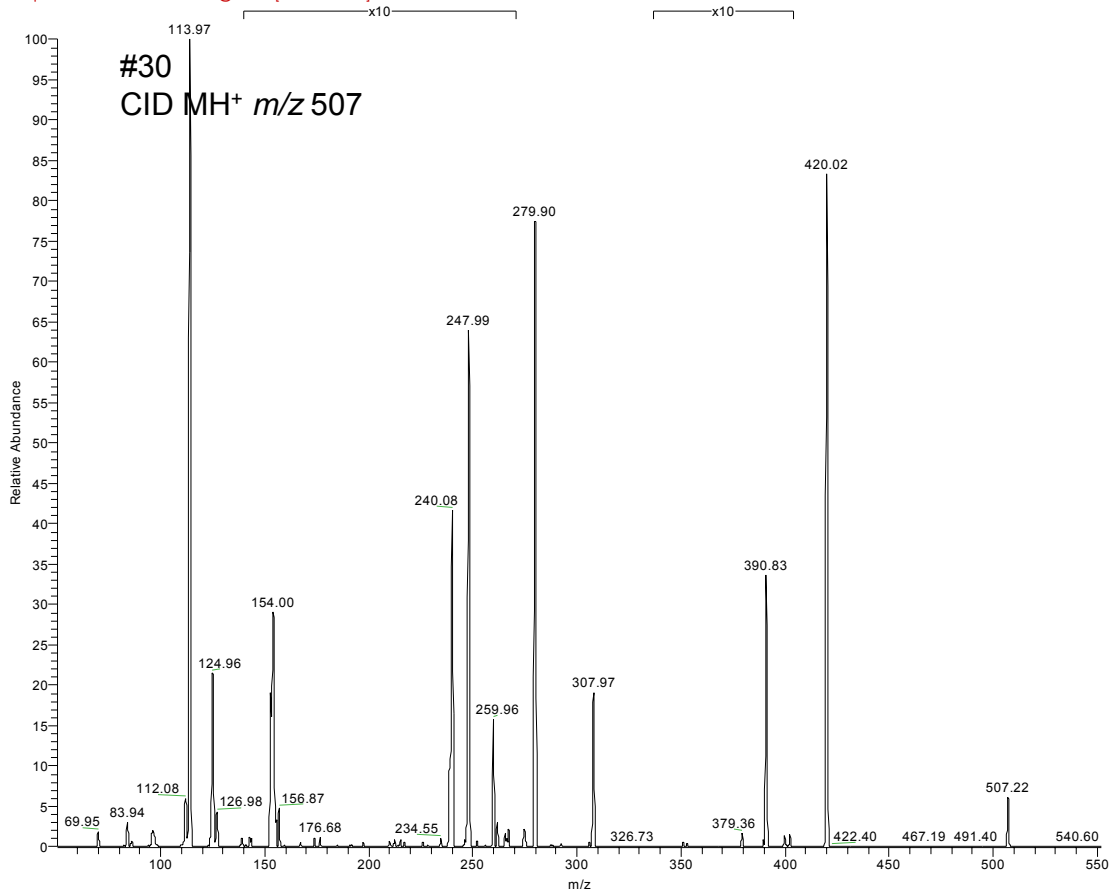

RT: 0.00 - 13.04 SM: 15G

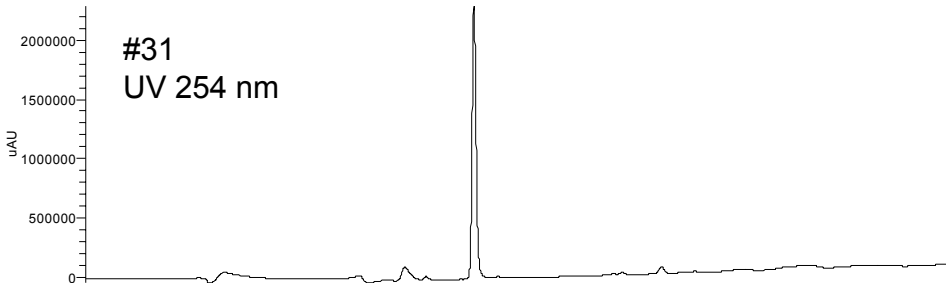

NL: 2.28E6  
Channel A UV  
08\_08\_2008\_UCSF\_PIS  
40\_080822232600

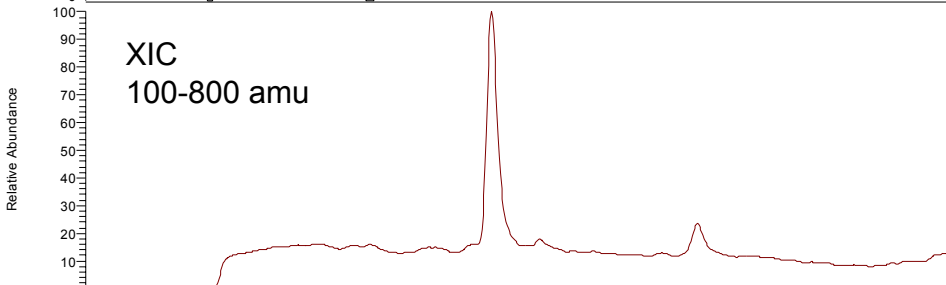

NL: 3.21E8  
m/z= 100.00-800.00 F: +  
p sid=-10.00 Q1MS [  
50.00-1200.00] MS  
08\_08\_2008\_UCSF\_PIS  
40\_080822232600

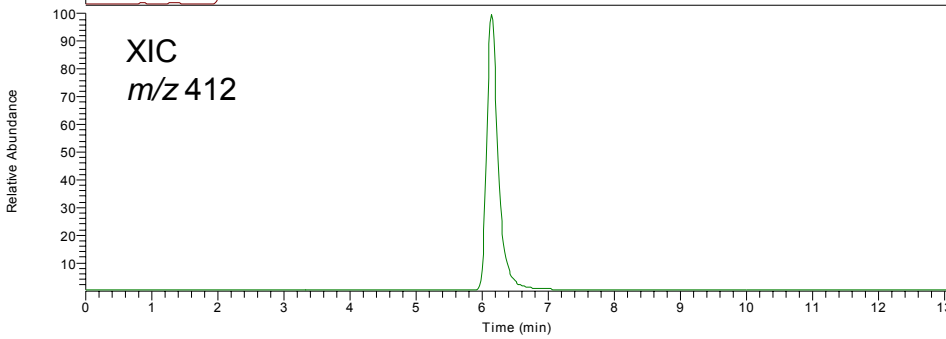

NL: 1.86E8  
m/z= 411.50-412.50 F: +  
p sid=-10.00 Q1MS [  
50.00-1200.00] MS  
08\_08\_2008\_UCSF\_PIS  
40\_080822232600

08\_08\_2008\_UCSF\_PIS40\_080822002013 #400-416 RT: 5.92-6.16 AV: 17 SB: 520 0.84-4.37, 5.86-10.01 SM: 15G NL: 8.31E6  
F: + p sid=-10.00 Full ms2 412.10@-30.00 [ 50.00-700.00]

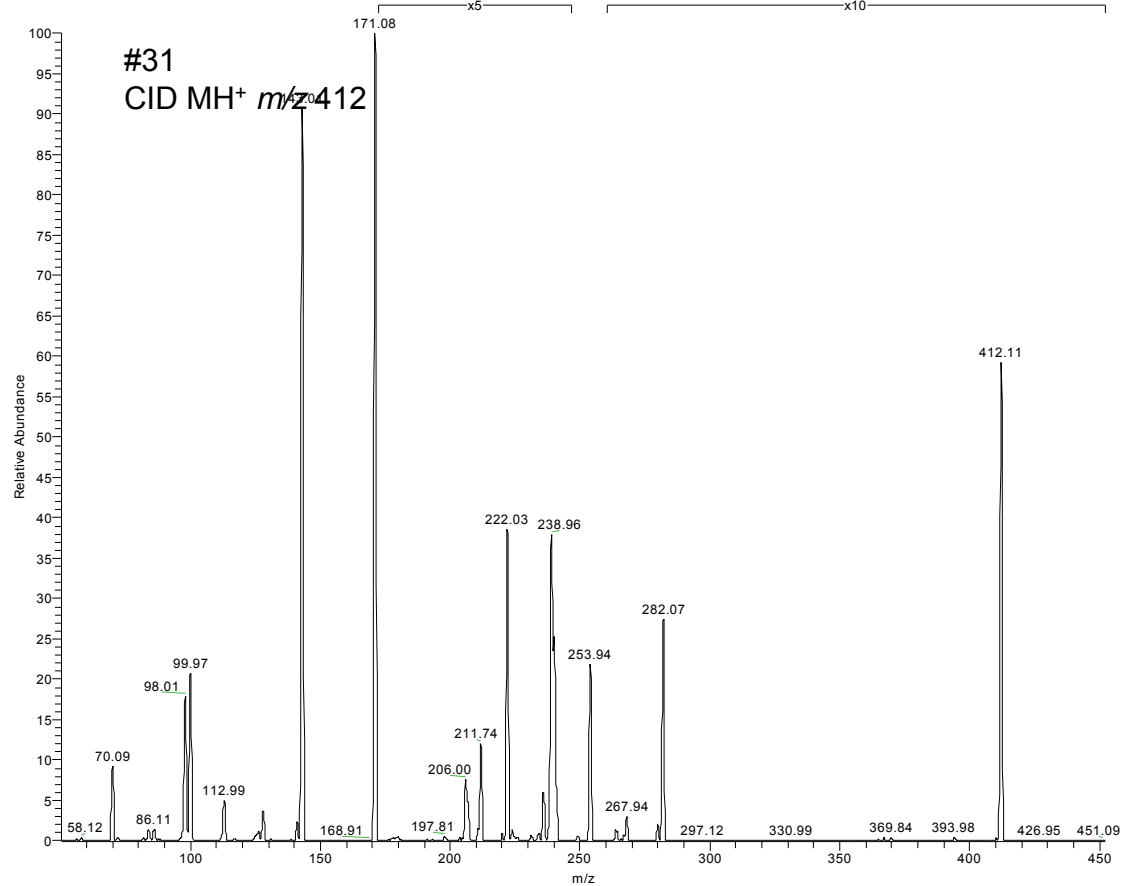

RT: 0.00 - 13.04 SM: 15G

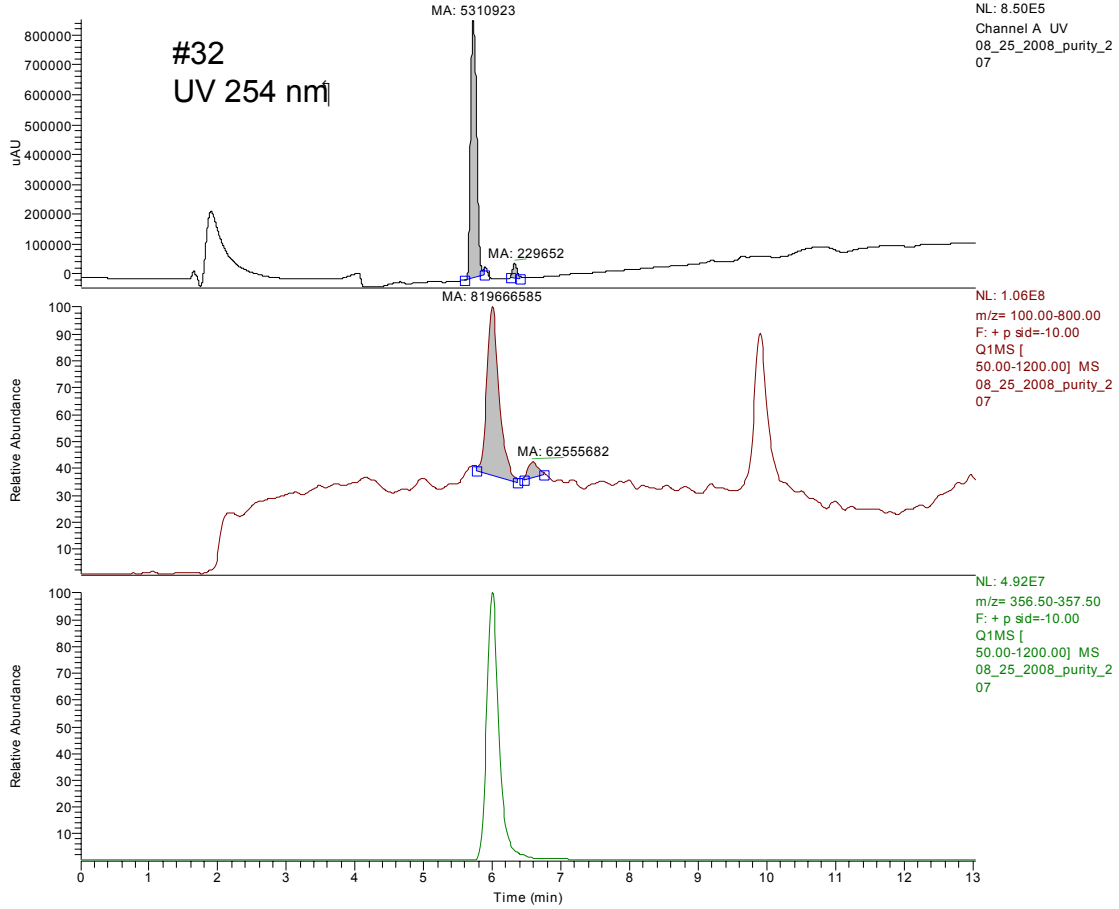

08\_22\_2008\_UCSF\_PURITY\_A18\_080824231833 #394-411 RT: 5.84-6.09 AV: 18 SB: 2 0.01, 0.01 SM: 15G NL: 4.24E6  
F: + p sd=-10.00 Full ms2 357.10@-30.00 [ 50.00-700.00]

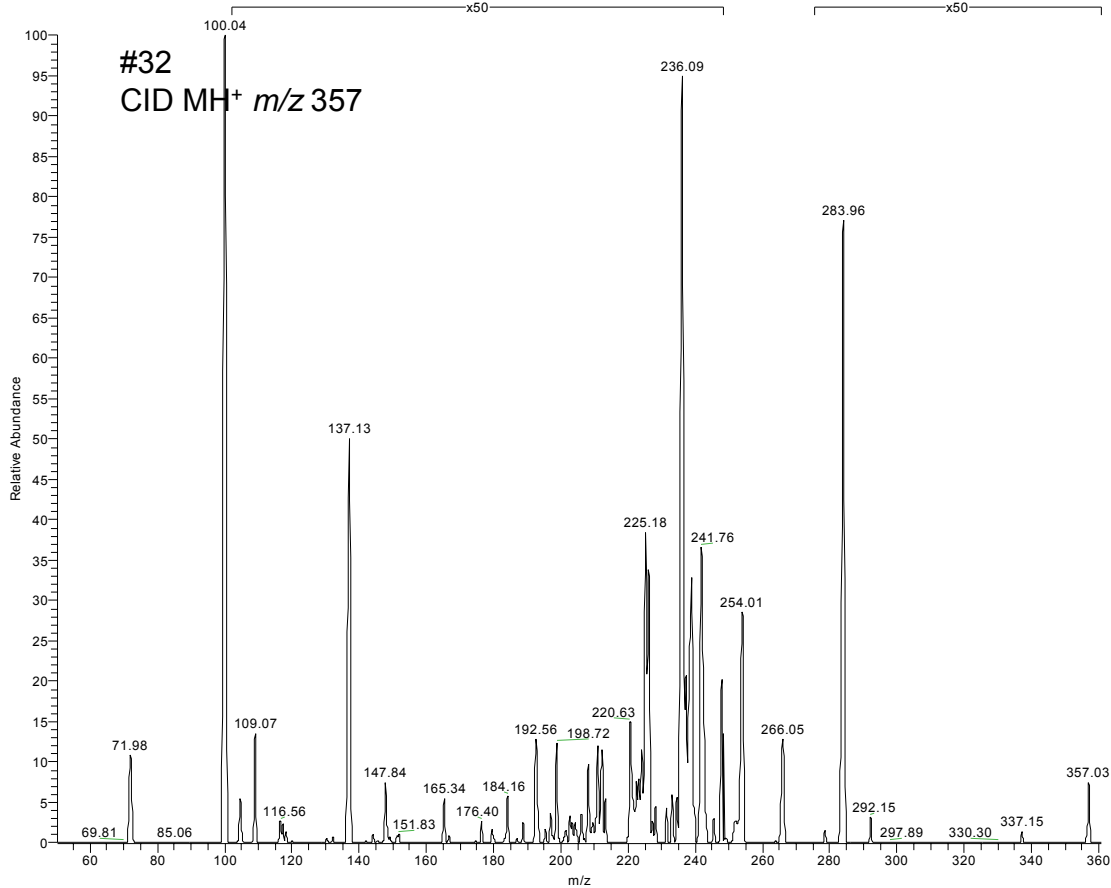

RT: 0.00 - 13.04 SM: 15G

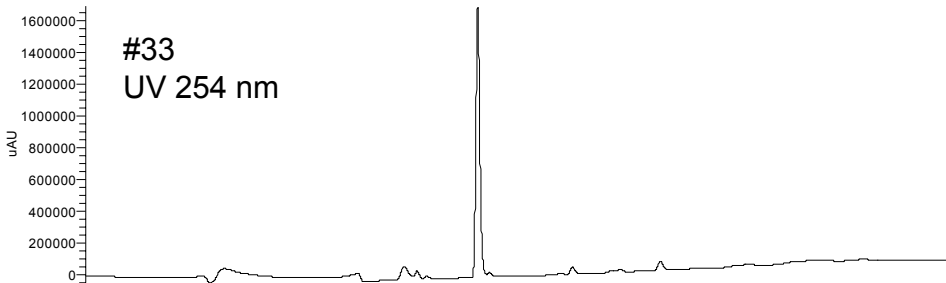

NL: 1.69E6  
Channel A UV  
08\_08\_2008\_UCSF\_PIS  
51\_080823014810

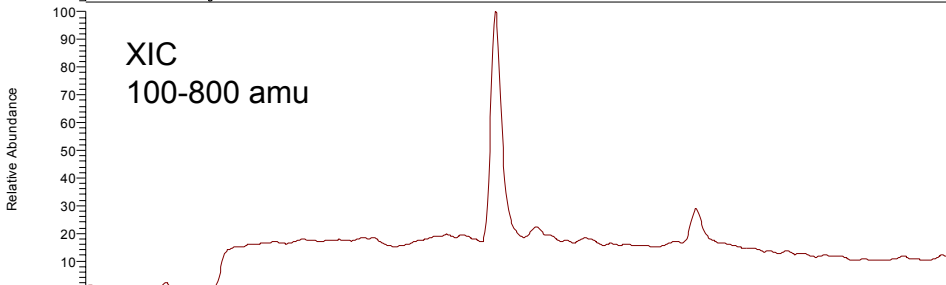

NL: 2.58E8  
m/z= 100.00-800.00 F: +  
p sid=-10.00 Q1MS [  
50.00-1200.00] MS  
08\_08\_2008\_UCSF\_PIS  
51\_080823014810

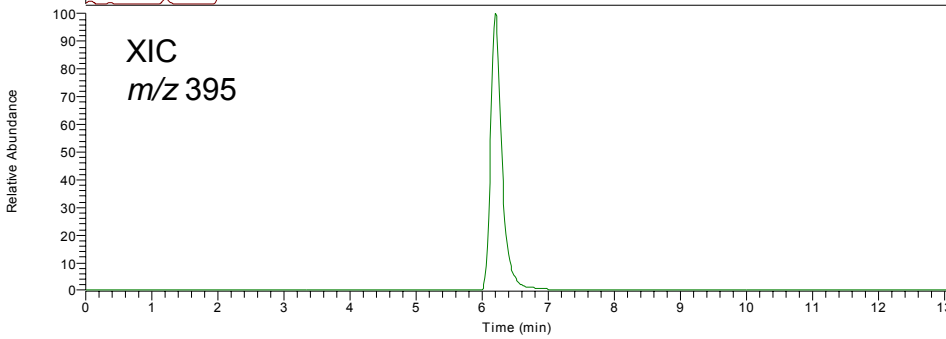

NL: 1.56E8  
m/z= 394.50-395.50 F: +  
p sid=-10.00 Q1MS [  
50.00-1200.00] MS  
08\_08\_2008\_UCSF\_PIS  
51\_080823014810

08\_08\_2008\_UCSF\_PIS51\_080822024217 #410-428 RT: 6.07-6.34 AV: 19 SB: 520 0.84-4.37, 5.87-10.02 SM: 15G NL: 4.11E6  
F: + p sid=-10.00 Full ms2 395.10@-30.00 [ 50.00-700.00]

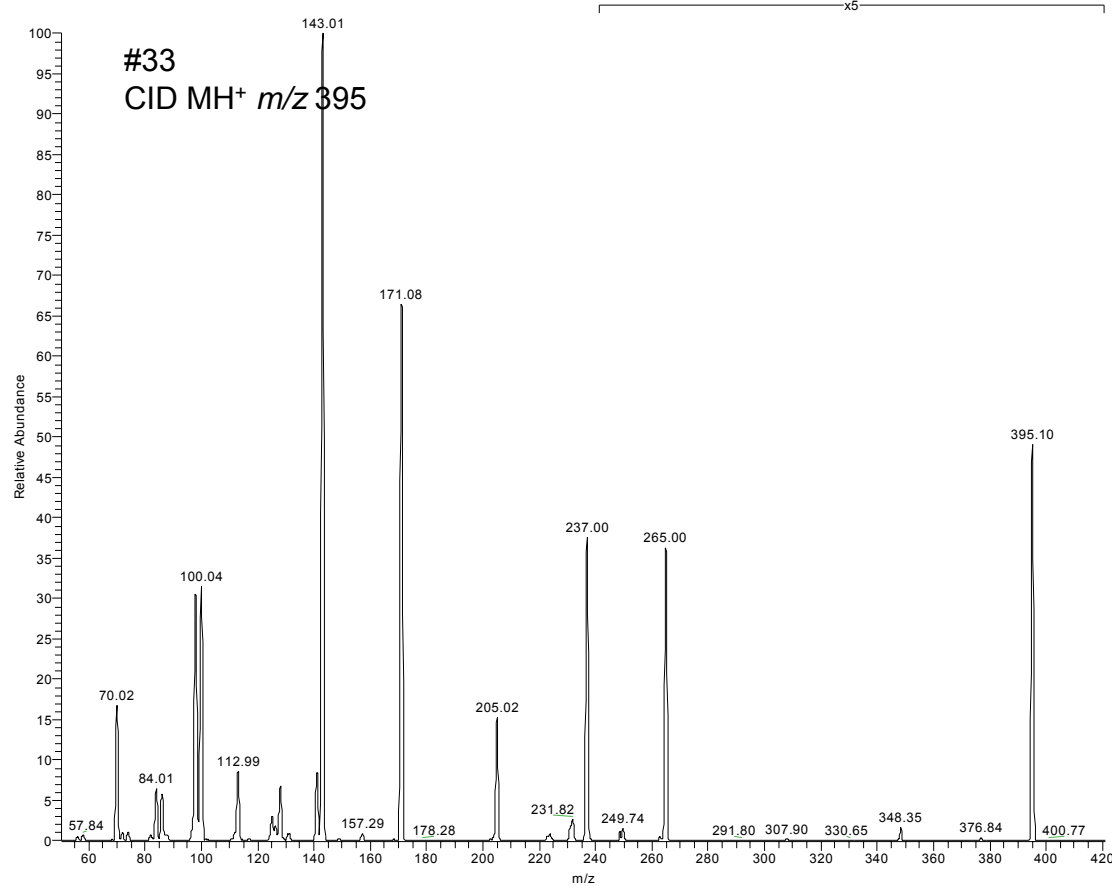

RT: 0.00 - 13.04 SM: 15G

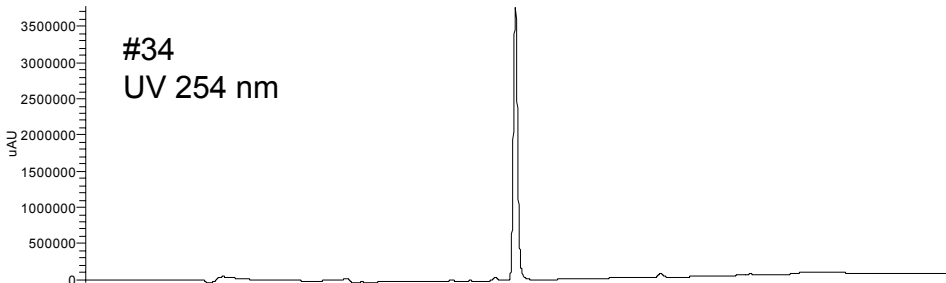

NL: 3.77E6  
Channel A UV  
08\_08\_2008\_UCSF\_PIS  
41\_080822234348

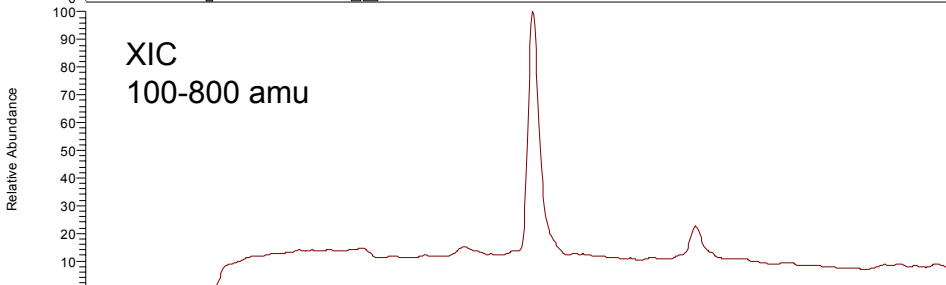

NL: 3.63E8  
m/z= 100.00-800.00 F: +  
p sid=-10.00 Q1MS [  
50.00-1200.00] MS  
08\_08\_2008\_UCSF\_PIS  
41\_080822234348

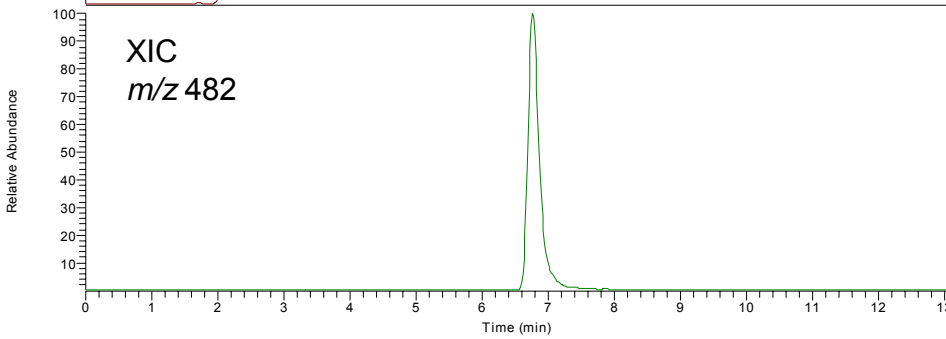

NL: 2.12E8  
m/z= 481.50-482.50 F: +  
p sid=-10.00 Q1MS [  
50.00-1200.00] MS  
08\_08\_2008\_UCSF\_PIS  
41\_080822234348

08\_08\_2008\_UCSF\_PIS41\_080822003801 #442-465 RT: 6.55-6.89 AV: 24 SB: 520 0.84-4.37 , 5.87-10.02 SM: 15G NL: 6.16E6  
F: + p sid=-10.00 Full ms2 482.10@-30.00 [ 50.00-700.00]

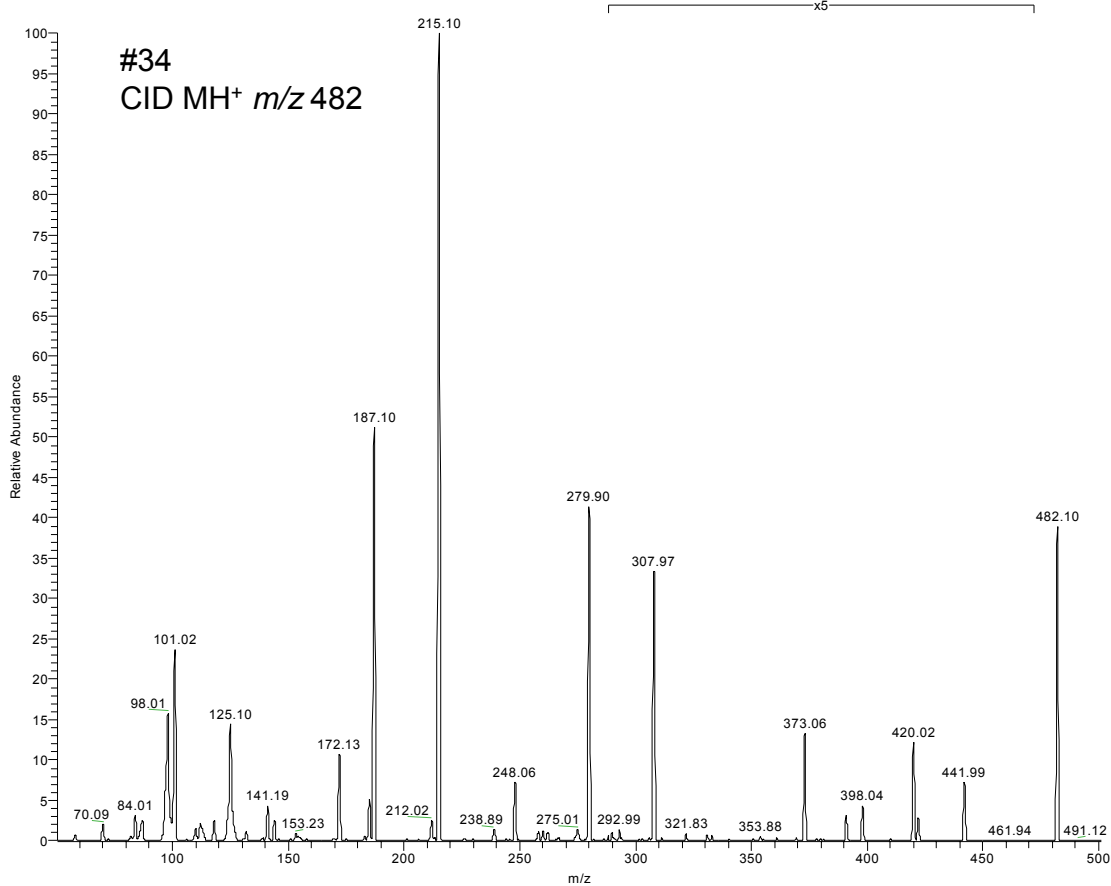



RT: 0.00 - 13.04 SM: 15G

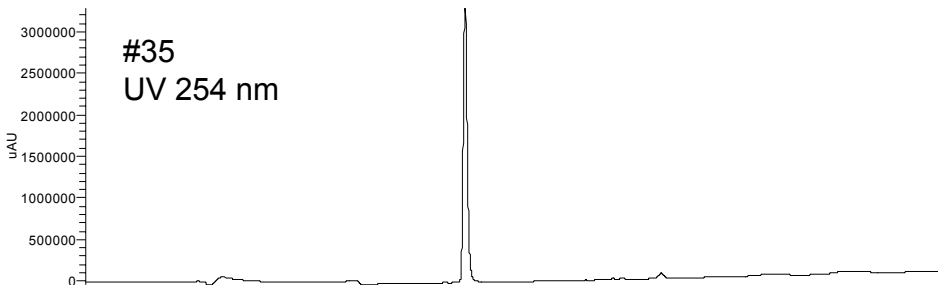

NL: 3.28E6  
Channel A UV  
08\_08\_2008\_UCSF\_PIS  
43\_080823001918

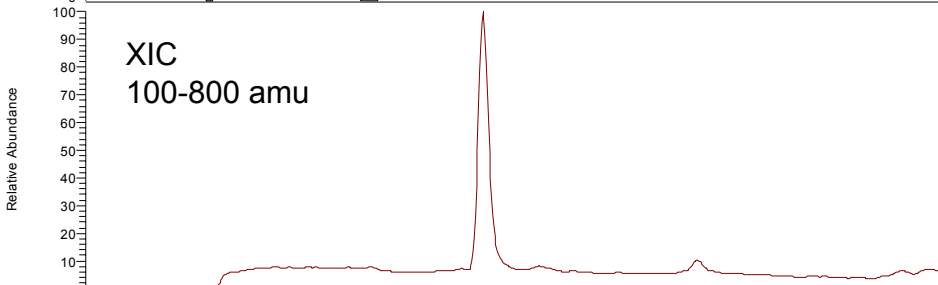

NL: 6.75E8  
m/z= 100.00-800.00 F: +  
p sd=-10.00 Q1MS [  
50.00-1200.00] MS  
08\_08\_2008\_UCSF\_PIS  
43\_080823001918

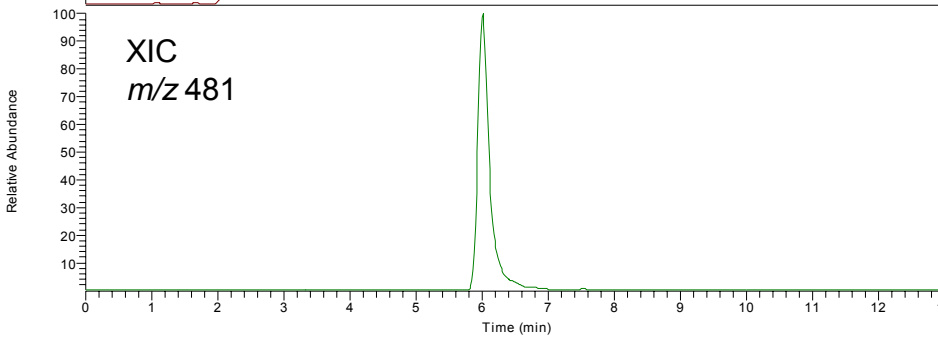

NL: 3.83E7  
m/z= 480.50-481.50 F: +  
p sd=-10.00 Q1MS [  
50.00-1200.00] MS  
08\_08\_2008\_UCSF\_PIS  
43\_080823001918

08\_08\_2008\_UCSF\_PIS43\_080822011326 #396-414 RT: 5.87-6.13 AV: 19 SB: 520 0.84-4.37, 5.87-10.02 SM: 15G NL: 1.73E6  
F: + p sd=-10.00 Full ms2 481.10@-30.00 [ 50.00-700.00]

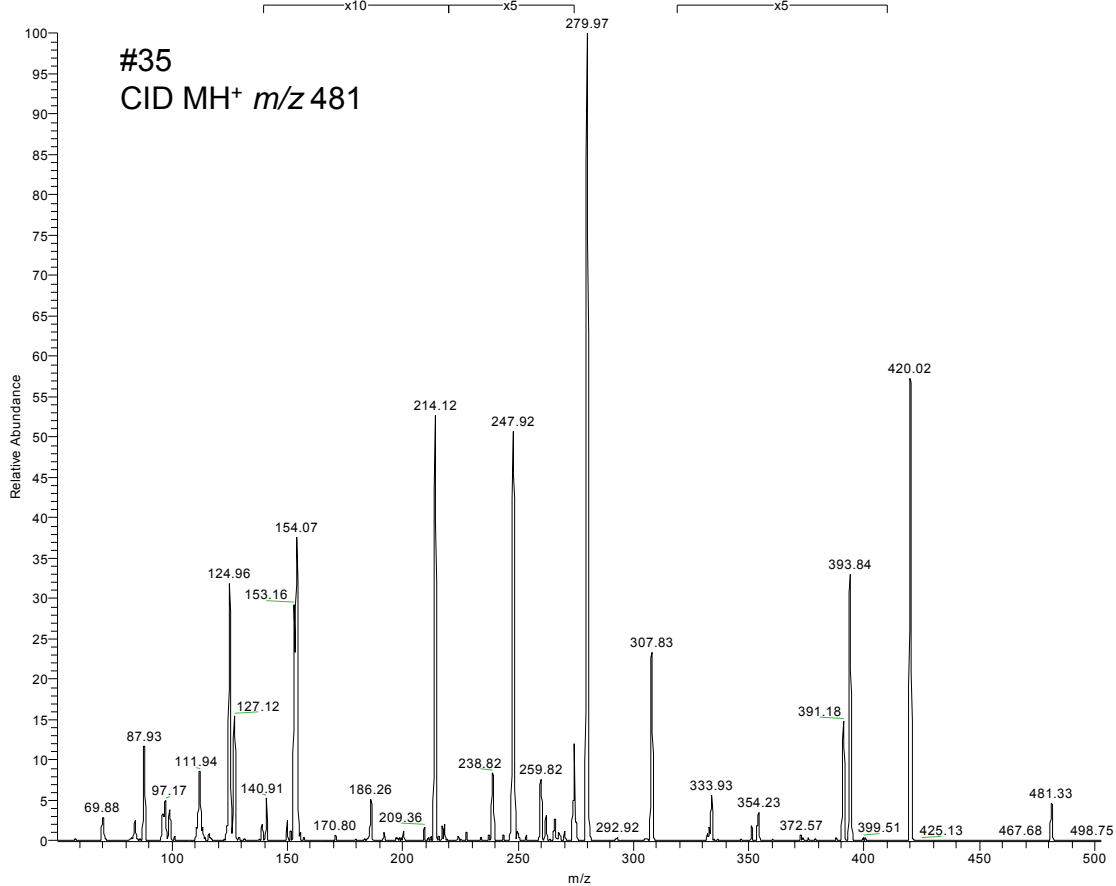

#36

GID MH+ m/z 526

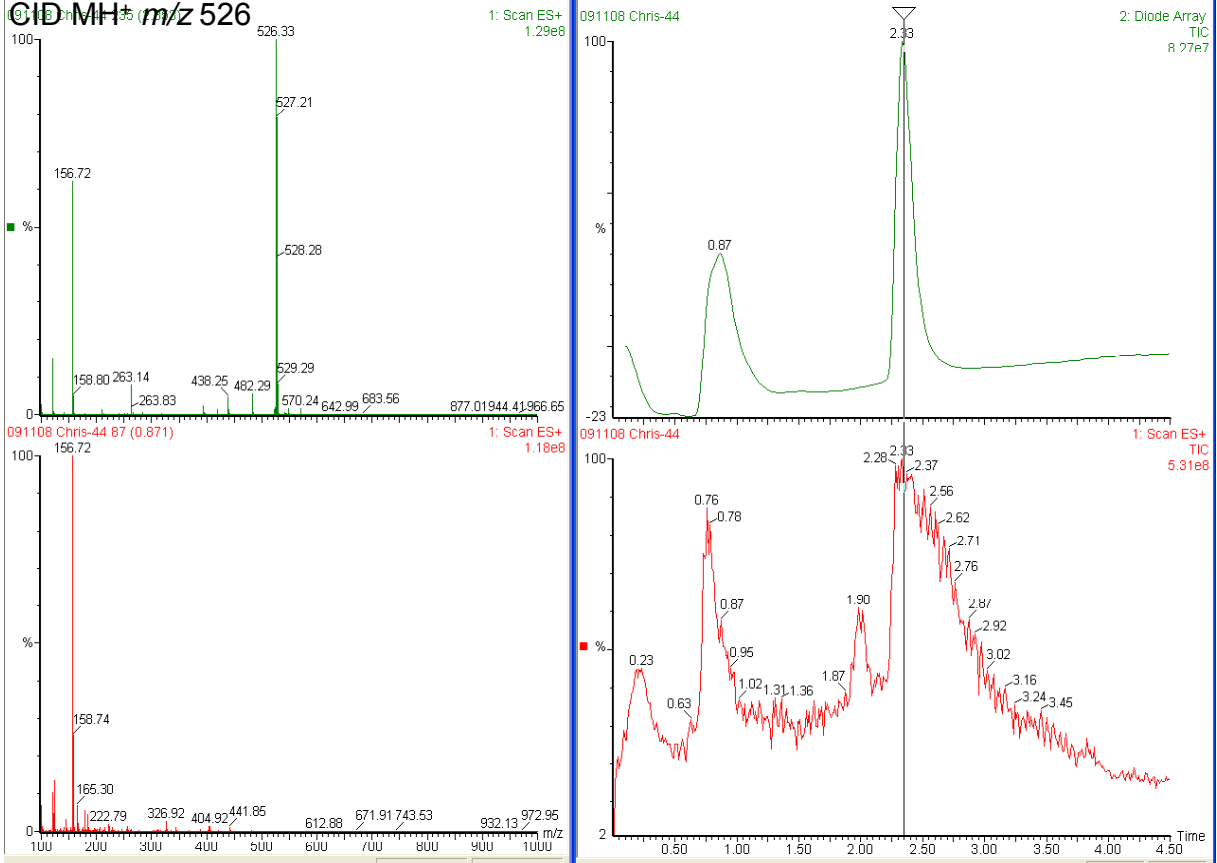

RT: 0.00 - 13.04 SM: 15G

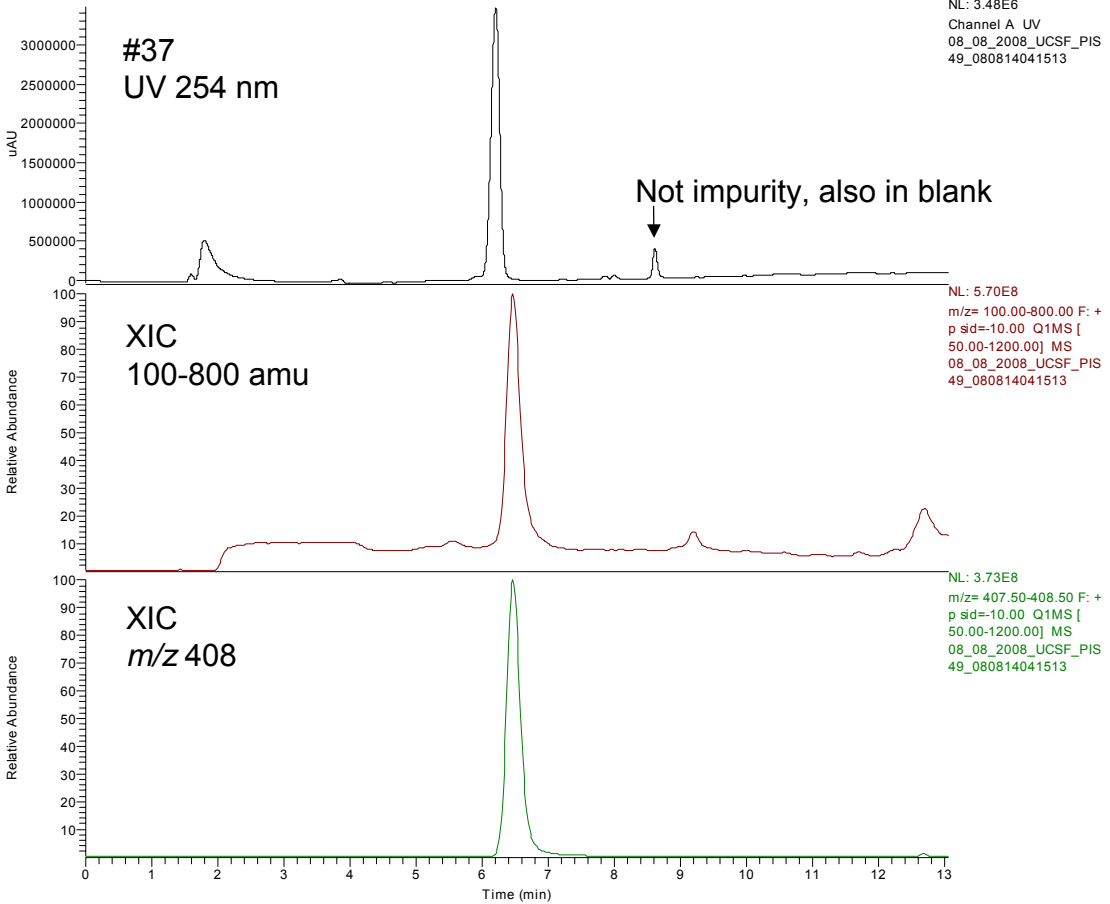

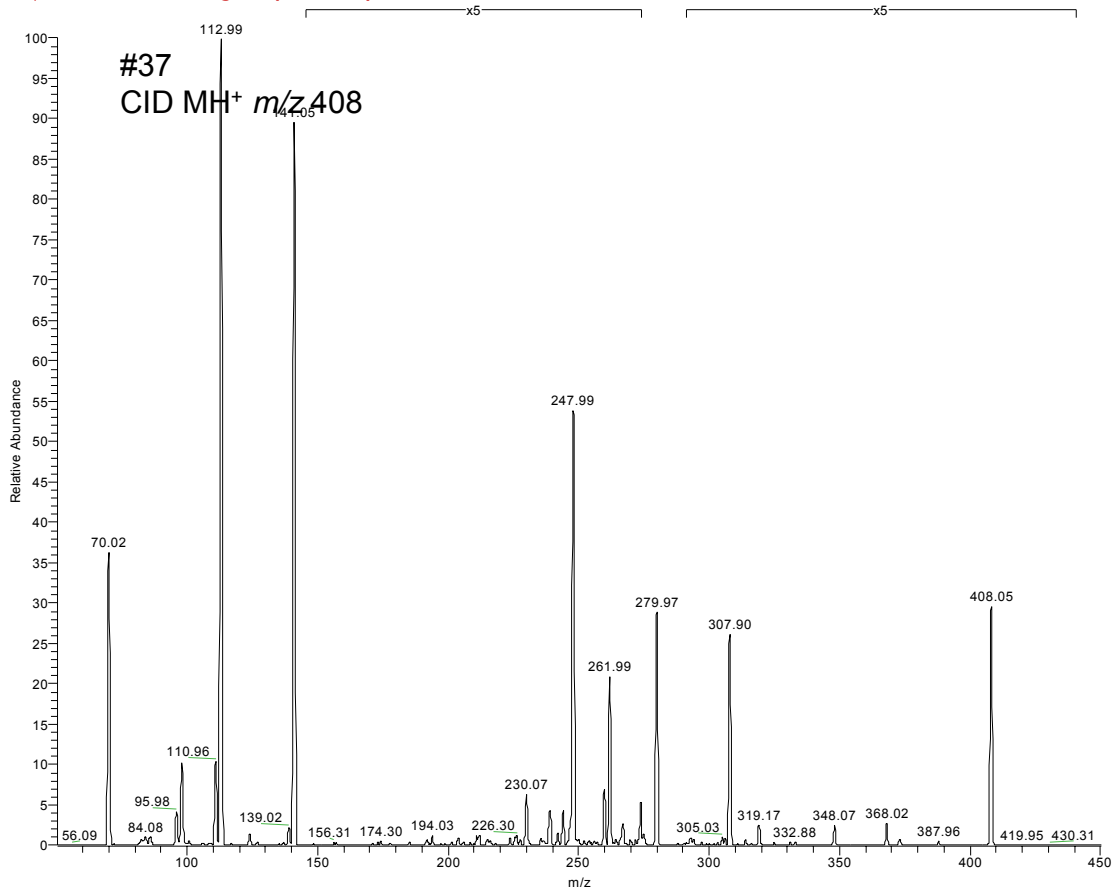

RT: 0.00 - 13.04 SM: 15G

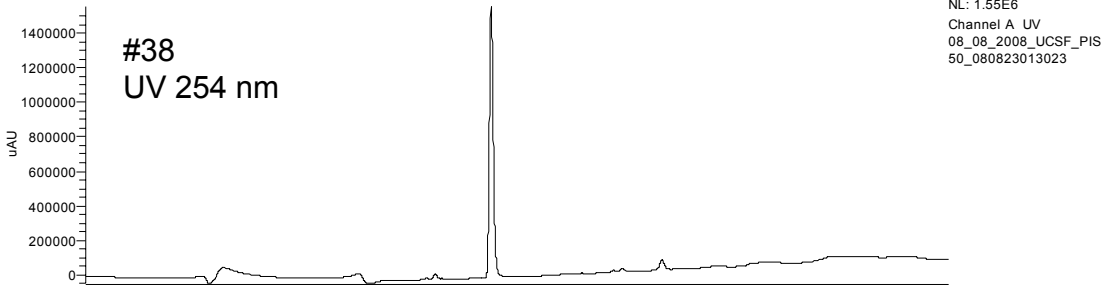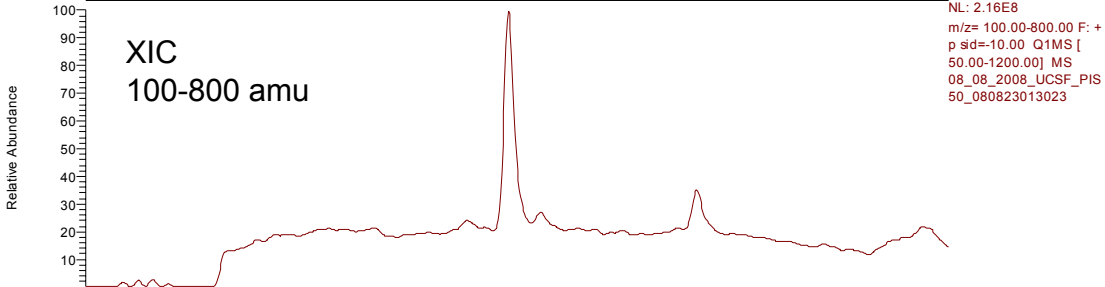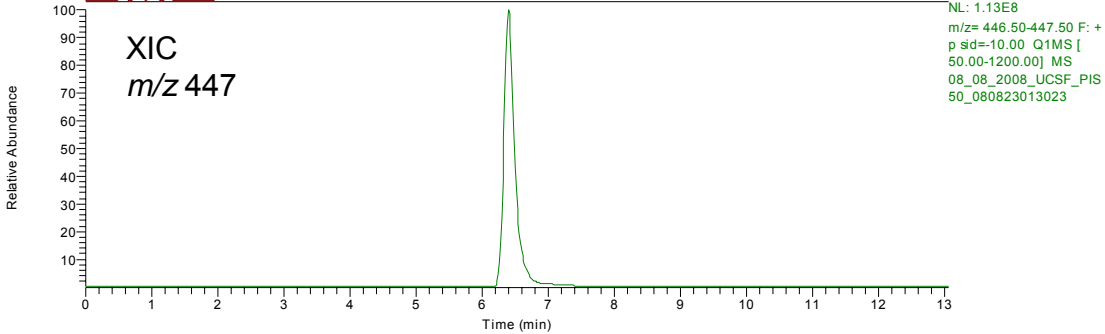

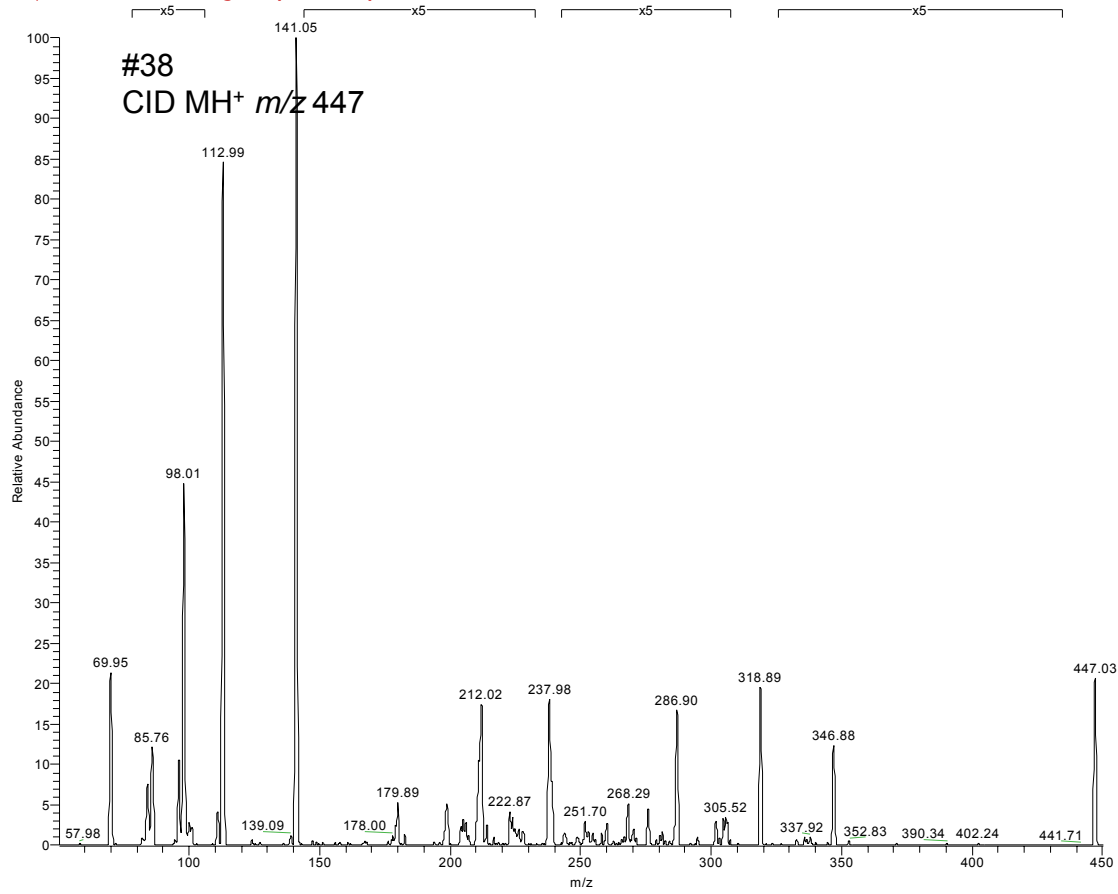

RT: 0.00 - 13.04 SM: 15G

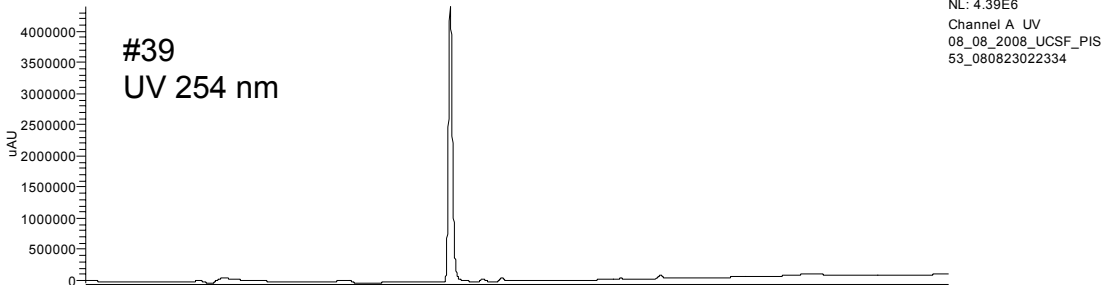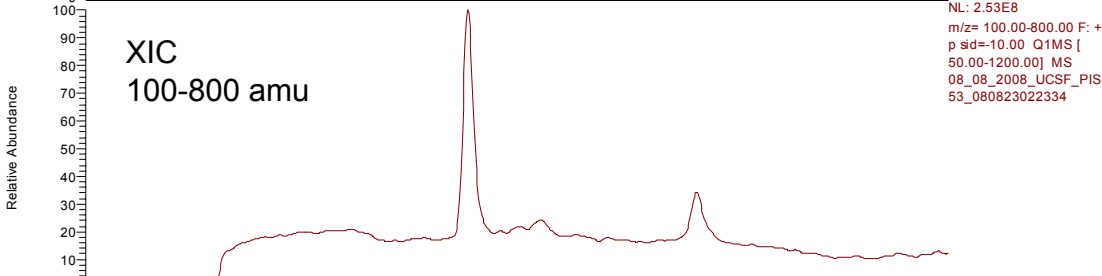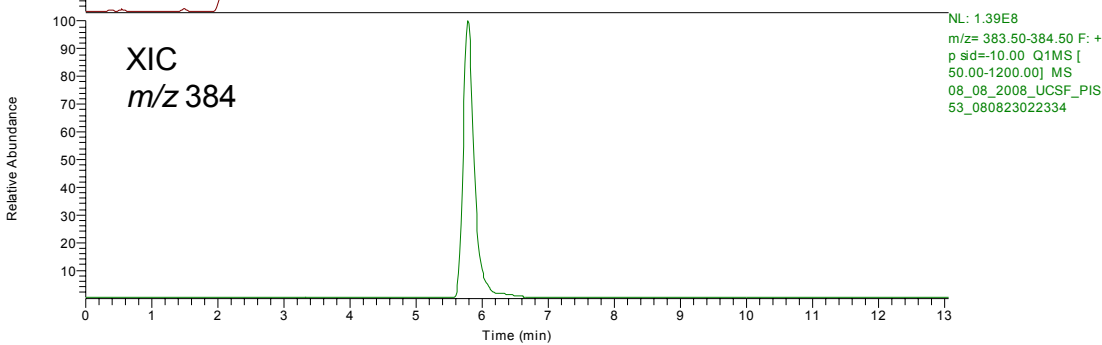

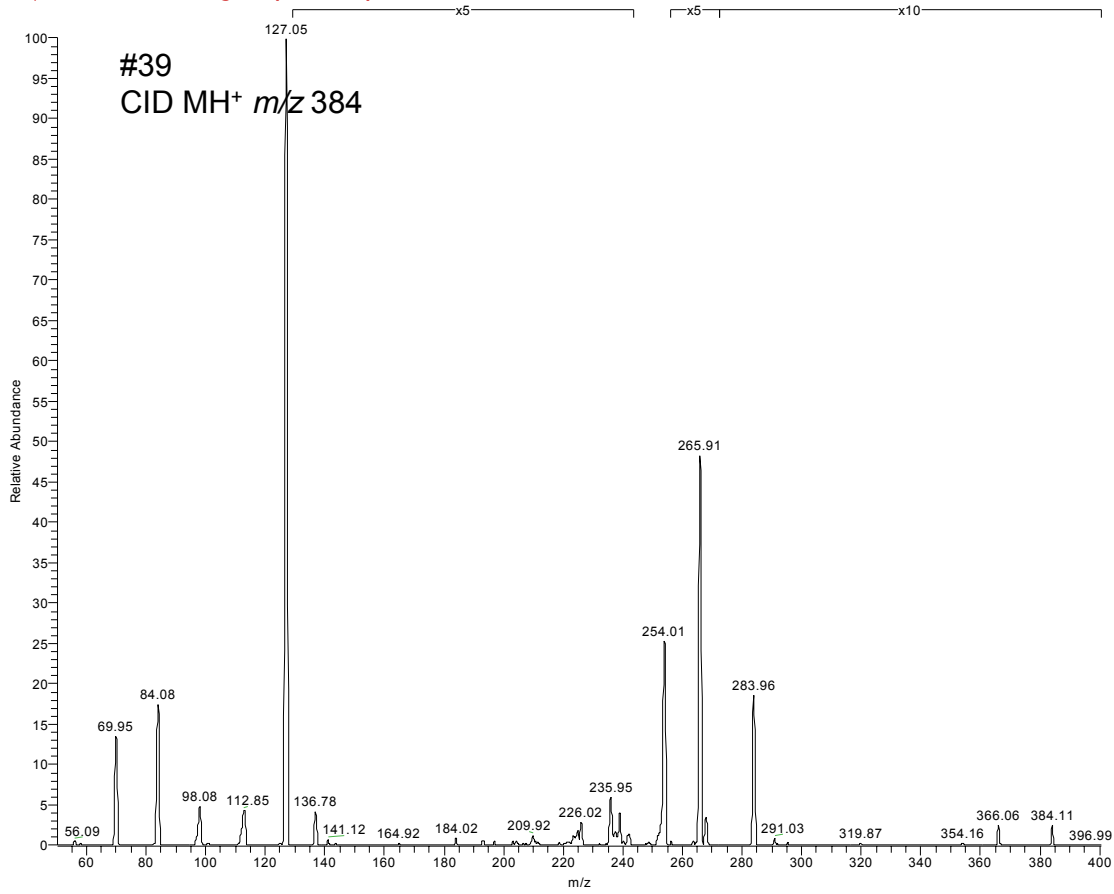

RT: 0.00 - 13.04 SM: 15G

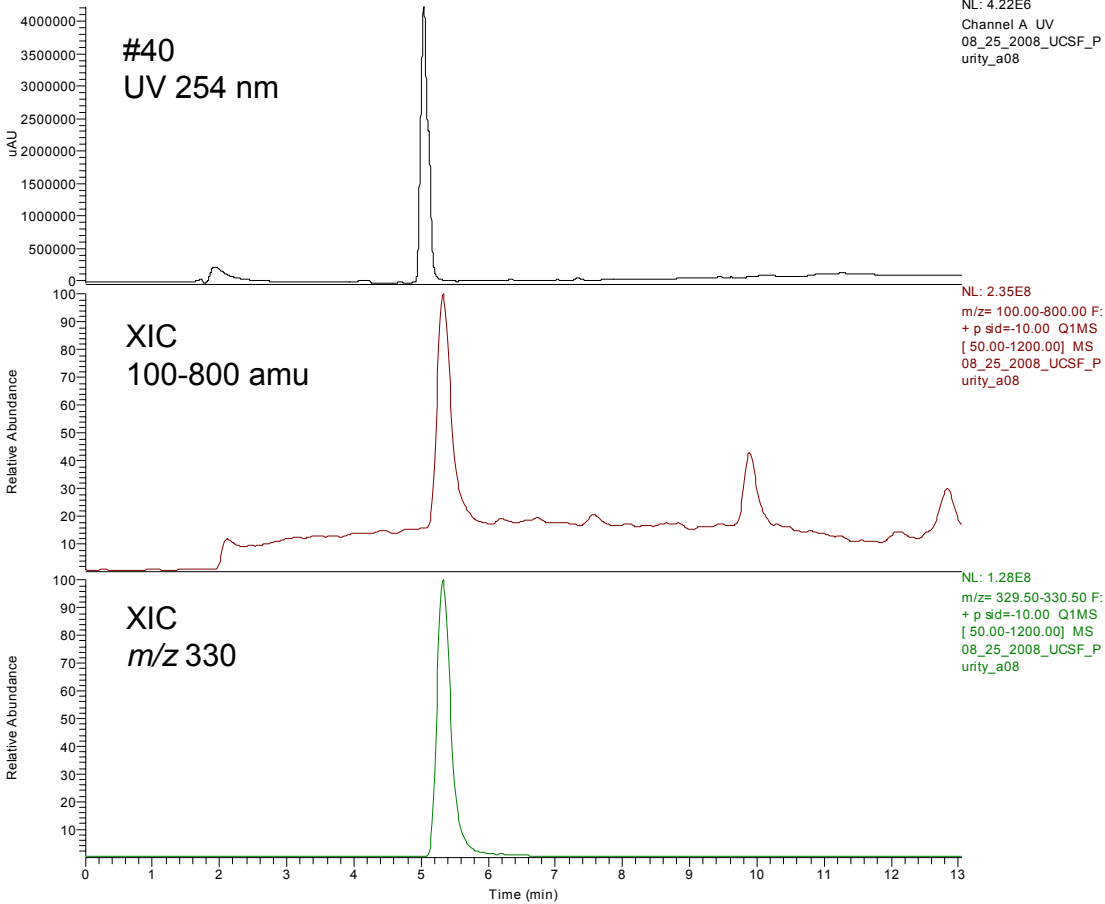

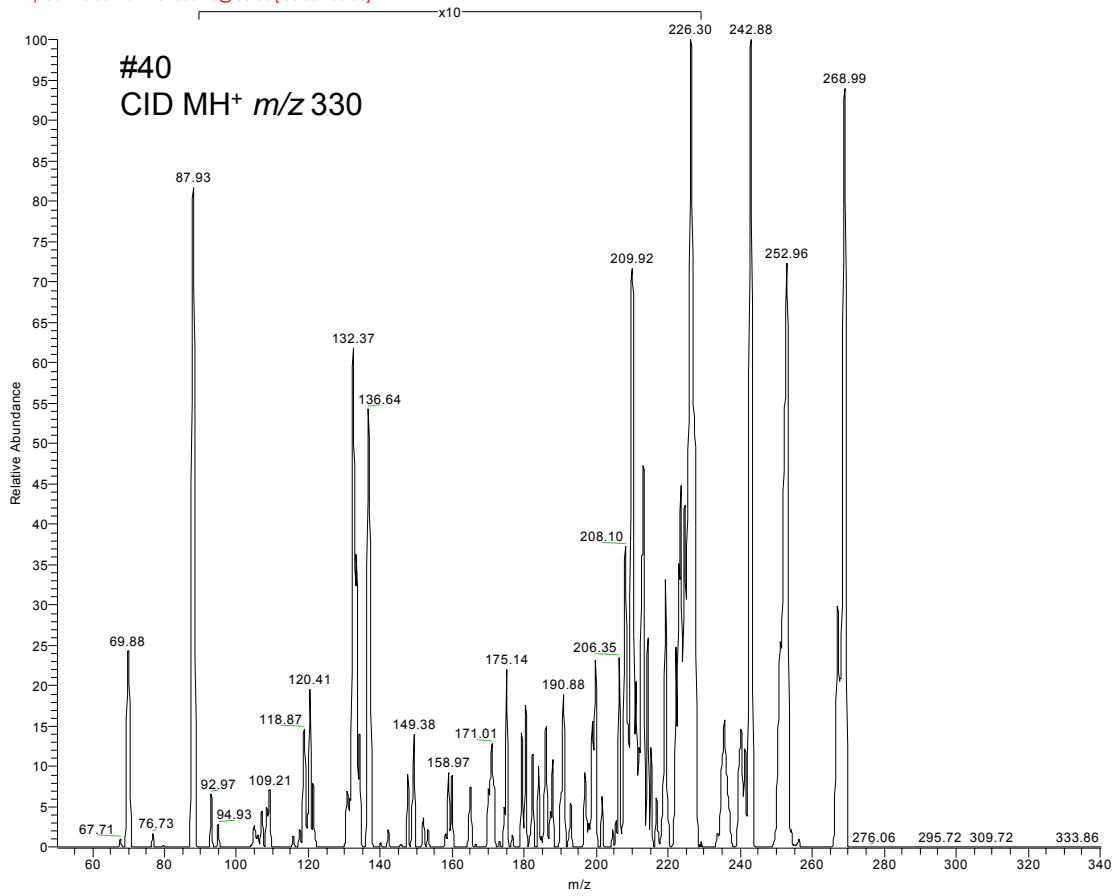

RT: 0.00 - 13.04 SM: 15G

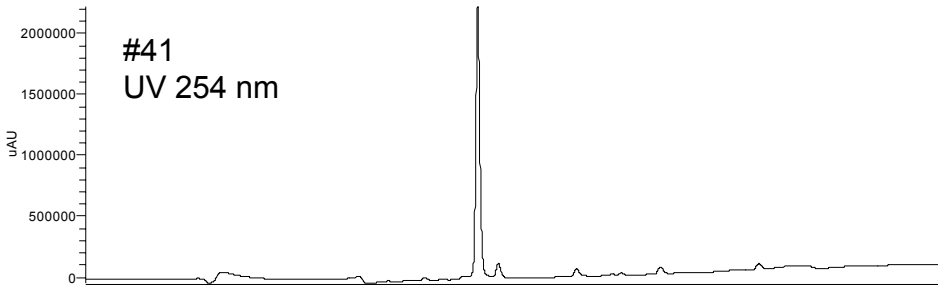

NL: 2.22E6  
Channel A UV  
08\_08\_2008\_UCSF\_PIS  
55\_080823025901

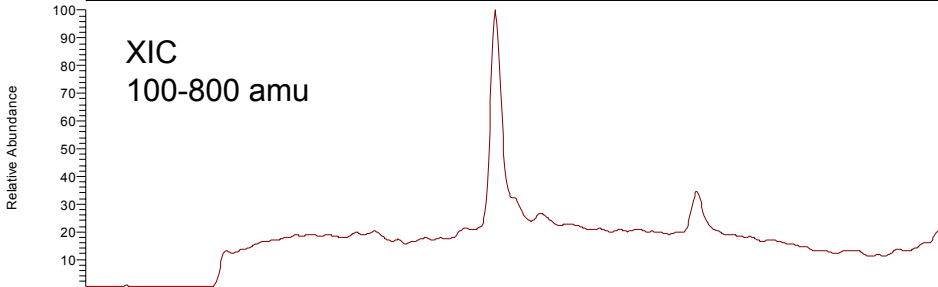

NL: 2.57E8  
m/z= 100.00-800.00 F: +  
p sid=-10.00 Q1MS [  
50.00-1200.00] MS  
08\_08\_2008\_UCSF\_PIS  
55\_080823025901

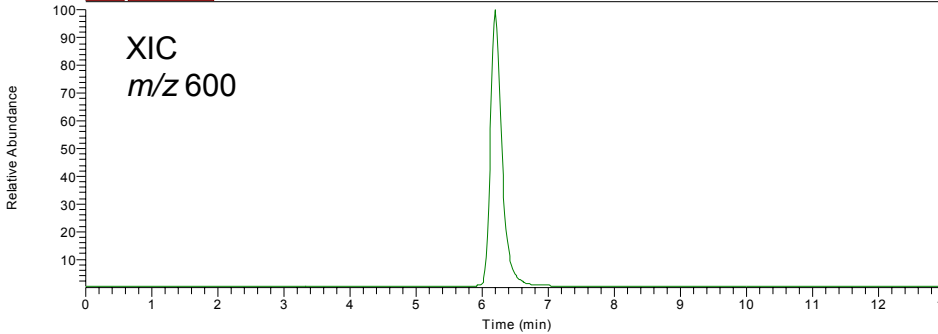

NL: 1.21E8  
m/z= 599.50-600.50 F: +  
p sid=-10.00 Q1MS [  
50.00-1200.00] MS  
08\_08\_2008\_UCSF\_PIS  
55\_080823025901

RT: 0.00 - 13.01 SM: 15G

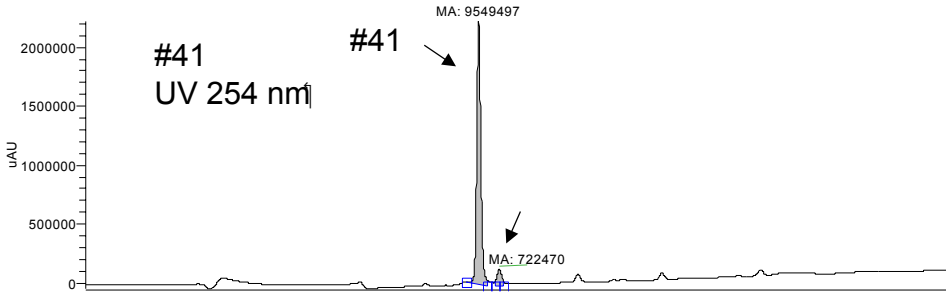

NL: 2.22E6  
Channel A UV  
08\_08\_2008\_UCSF\_PIS  
55\_080823025901

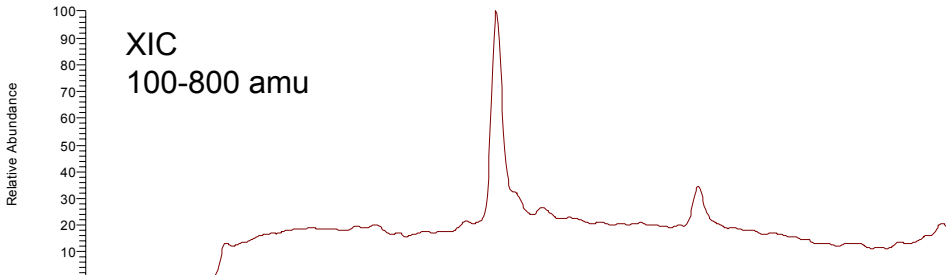

NL: 2.57E8  
m/z= 100.00-800.00 F: +  
p sid=-10.00 Q1MS [  
50.00-1200.00] MS  
08\_08\_2008\_UCSF\_PIS  
55\_080823025901

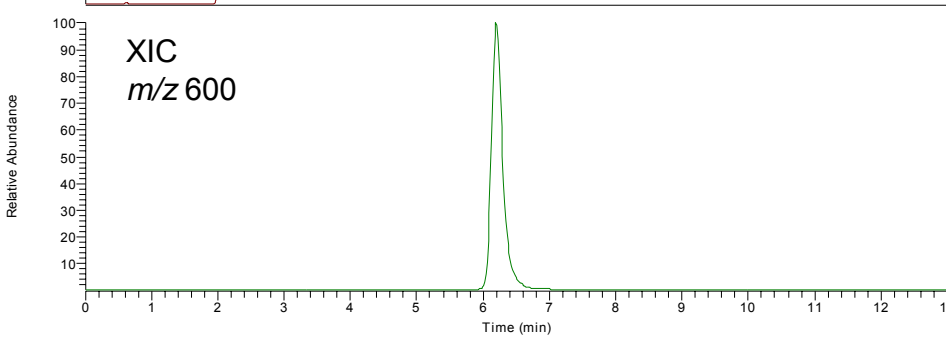

NL: 1.21E8  
m/z= 599.50-600.50 F: +  
p sid=-10.00 Q1MS [  
50.00-1200.00] MS  
08\_08\_2008\_UCSF\_PIS  
55\_080823025901

08\_08\_2008\_UCSF\_PIS55\_080822035324 #404-420 RT: 5.98-6.22 AV: 17 SB: 520 0.84-4.37, 5.87-10.02 SM: 15G NL: 3.07E6  
F: + p sid=-10.00 Full ms2 600.10@-30.00 [ 50.00-700.00]

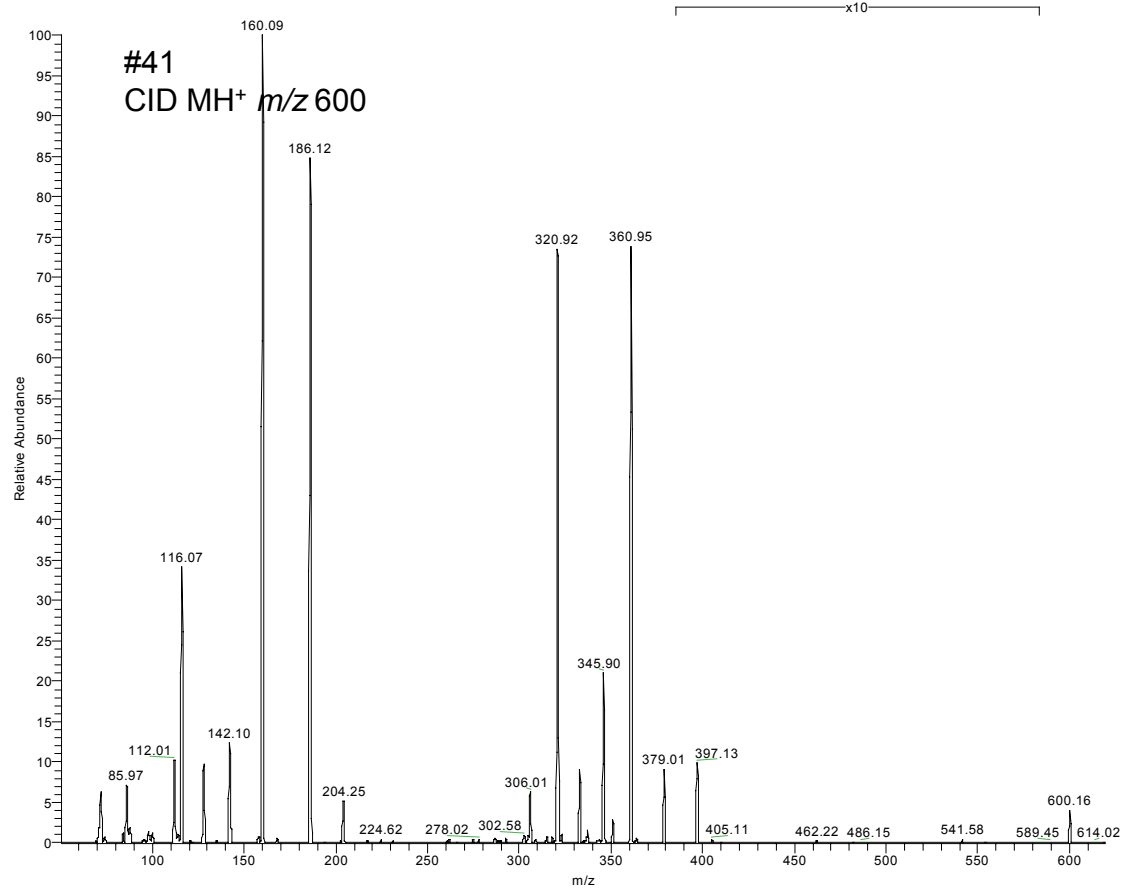

RT: 0.00 - 13.04 SM: 15G

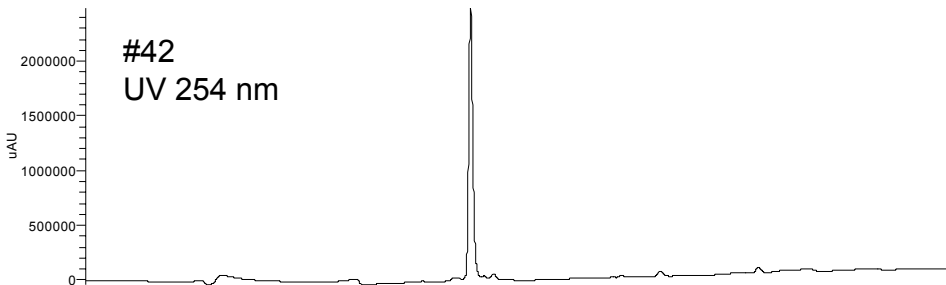

NL: 2.48E6  
Channel A UV  
08\_08\_2008\_UCSF\_PIS  
56\_080823031649

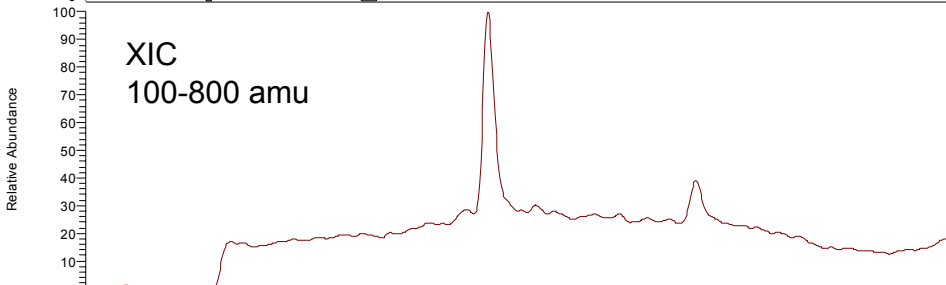

NL: 2.50E8  
m/z= 100.00-800.00 F: +  
p sd=-10.00 Q1MS [  
50.00-1200.00] MS  
08\_08\_2008\_UCSF\_PIS  
56\_080823031649

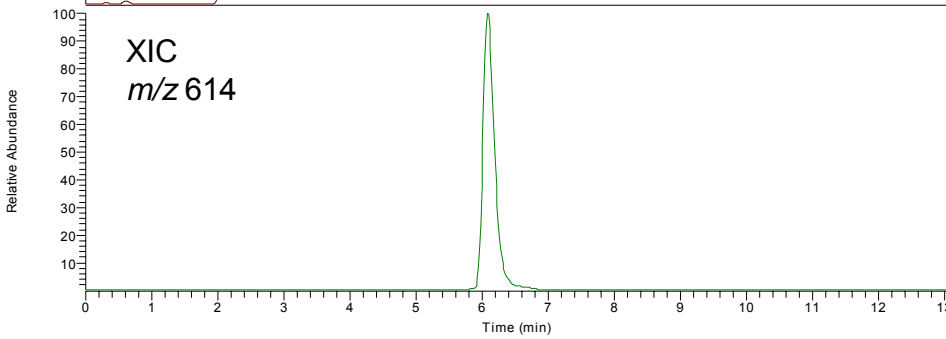

NL: 1.13E8  
m/z= 613.50-614.50 F: +  
p sd=-10.00 Q1MS [  
50.00-1200.00] MS  
08\_08\_2008\_UCSF\_PIS  
56\_080823031649

08\_08\_2008\_UCSF\_PIS56\_080822041108 #398-424 RT: 5.89-6.28 AV: 27 SB: 520 0.84-4.37, 5.86-10.02 SM: 15G NL: 2.95E6  
F: + p sd=-10.00 Full ms2 614.10@-30.00 [ 50.00-700.00]

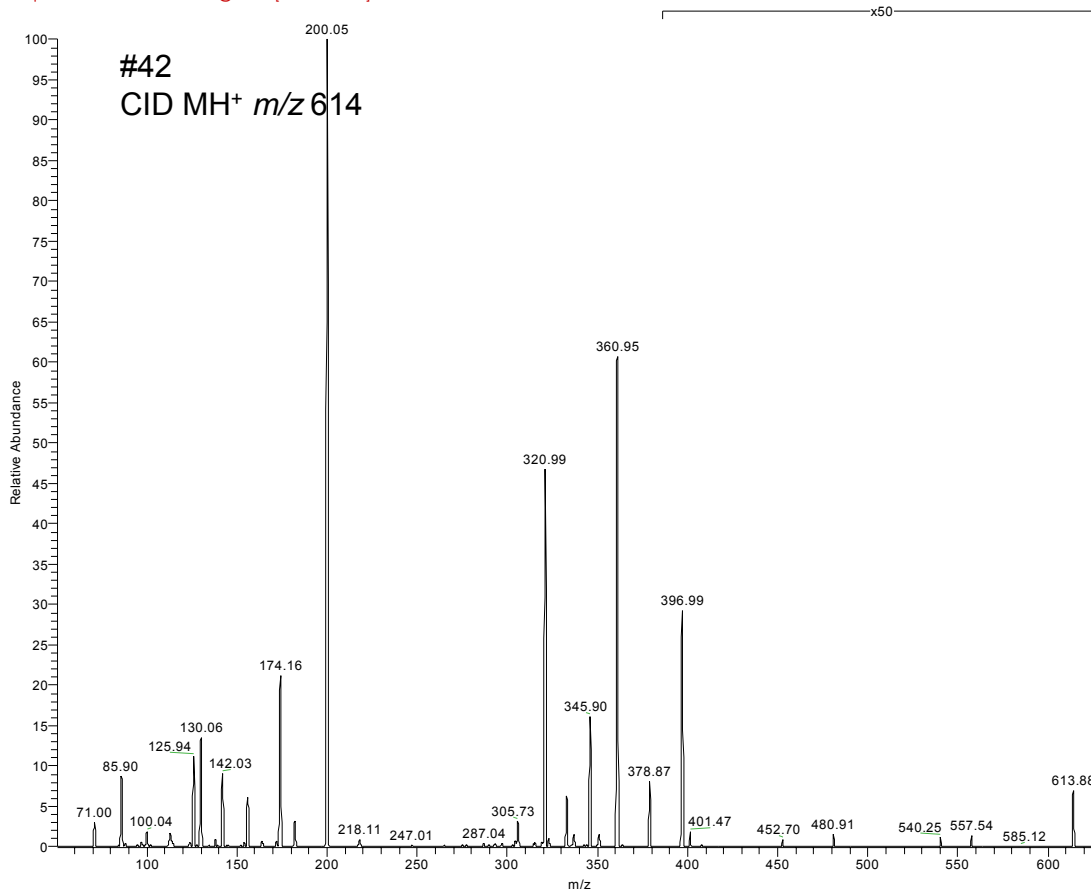



RT: 0.00 - 13.04 SM: 15G

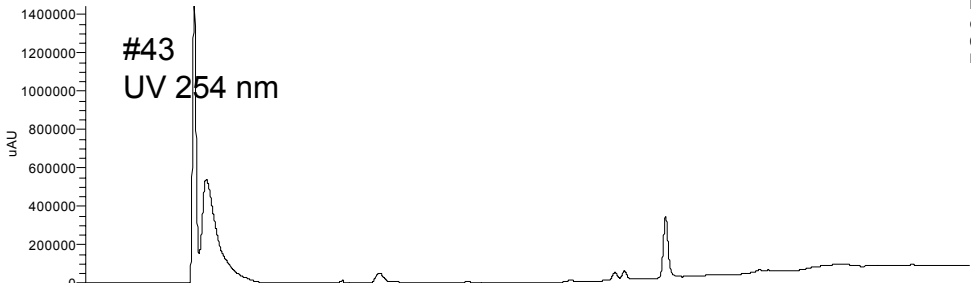

NL: 1.44E6  
Channel A UV  
08\_08\_2008\_UCSF\_  
PIS61

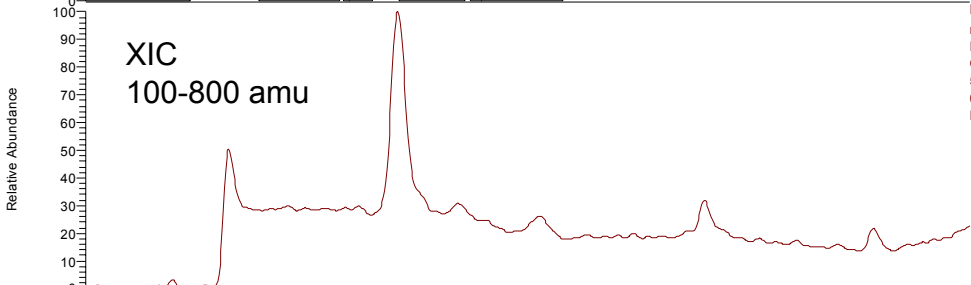

NL: 2.21E8  
m/z= 100.00-800.00  
F: + p sd=-10.00  
Q1MS [  
50.00-1200.00] MS  
08\_08\_2008\_UCSF\_  
PIS61

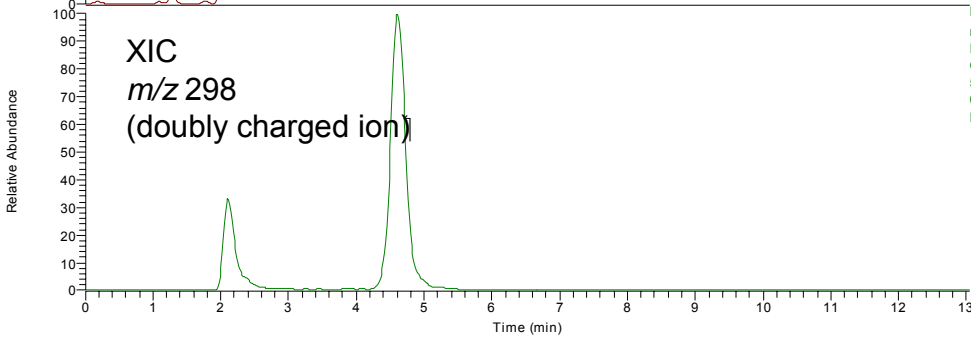

NL: 8.96E7  
m/z= 297.50-298.50  
F: + p sd=-10.00  
Q1MS [  
50.00-1200.00] MS  
08\_08\_2008\_UCSF\_  
PIS61

08\_08\_2008\_UCSF\_PIS61\_080822044641 #324-343 RT: 4.80-5.08 AV: 20 SB: 520 0.84-4.37, 5.86-10.02 SM: 15G NL: 3.56E5  
F: + p sd=-10.00 Full ms2 595.10@-30.00 [ 50.00-700.00]

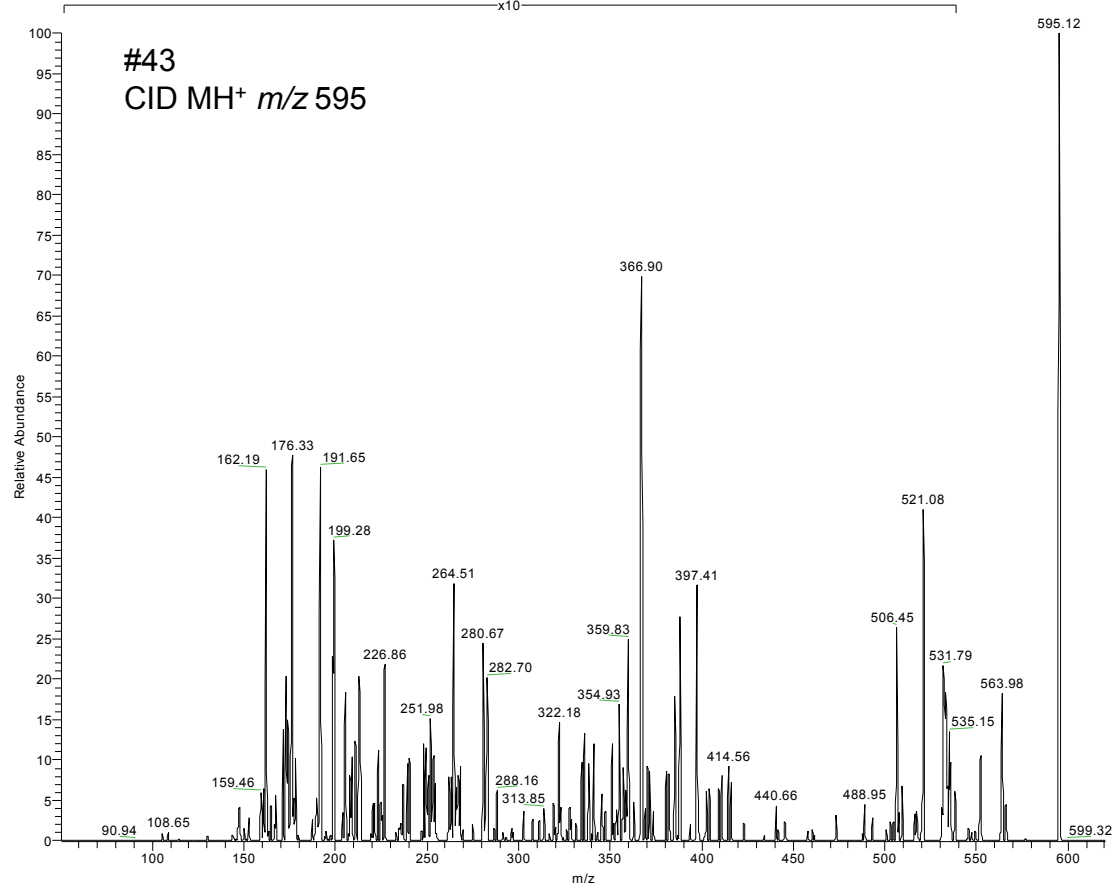

RT: 0.00 - 13.04 SM: 15G

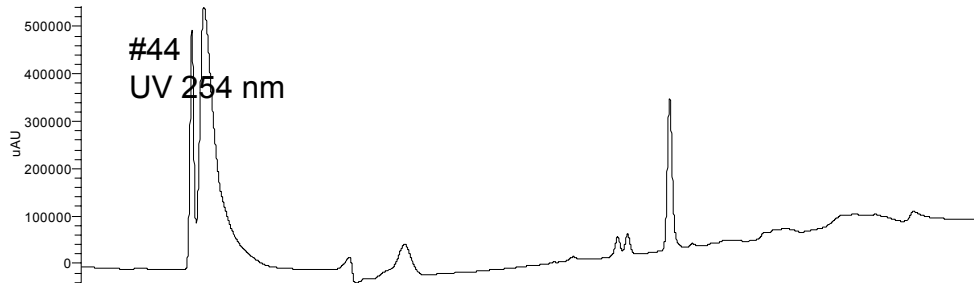

NL: 5.42E5  
Channel A UV  
08\_08\_2008\_UCSF\_  
PIS62

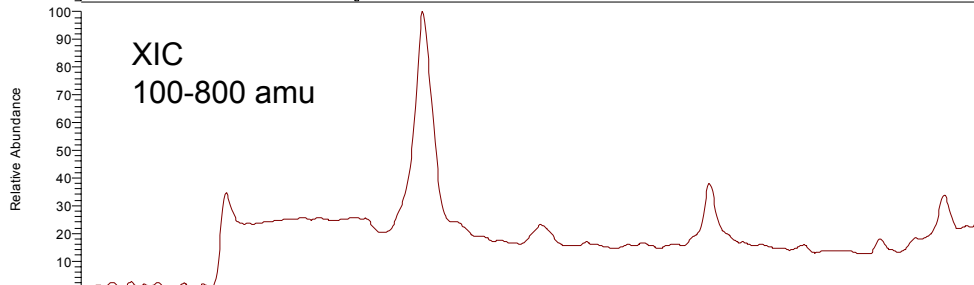

NL: 2.55E8  
m/z= 100.00-800.00  
F: + p sd=-10.00  
Q1MS [  
50.00-1200.00] MS  
08\_08\_2008\_UCSF\_  
PIS62

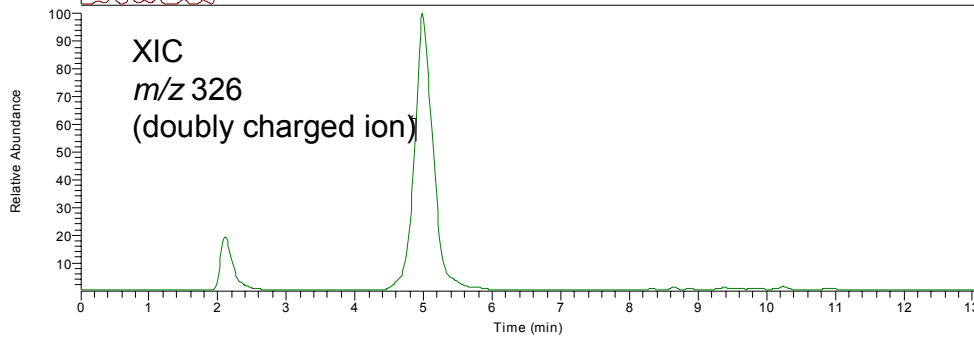

NL: 1.25E8  
m/z= 325.50-326.50  
F: + p sd=-10.00  
Q1MS [  
50.00-1200.00] MS  
08\_08\_2008\_UCSF\_  
PIS62

08\_08\_2008\_UCSF\_PIS62\_080822050425 #349-363 RT: 5.17-5.38 AV: 15 SB: 520.0 8.4-4.37, 5.87-10.02 SM: 15G NL: 8.04E4  
F: + p sd=-10.00 Full ms2 651.10@-30.00 [ 50.00-700.00]

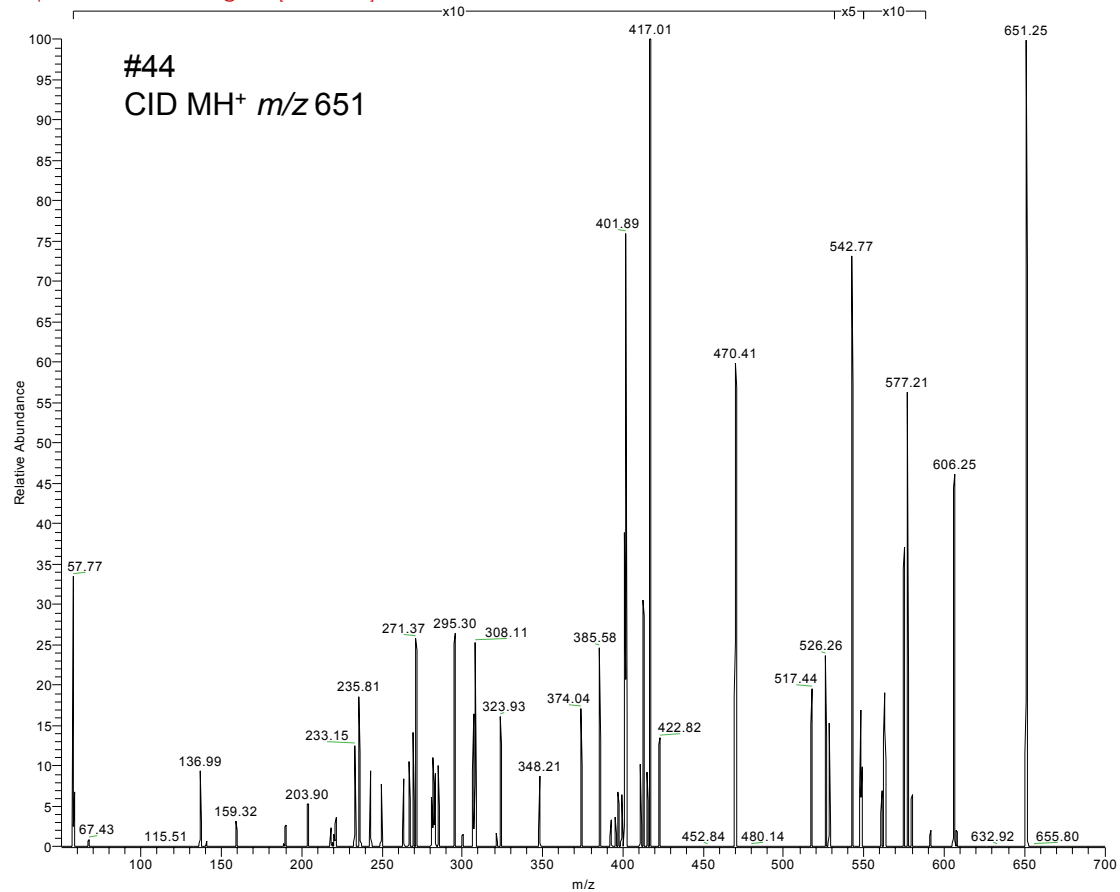

RT: 0.00 - 13.04 SM: 15G

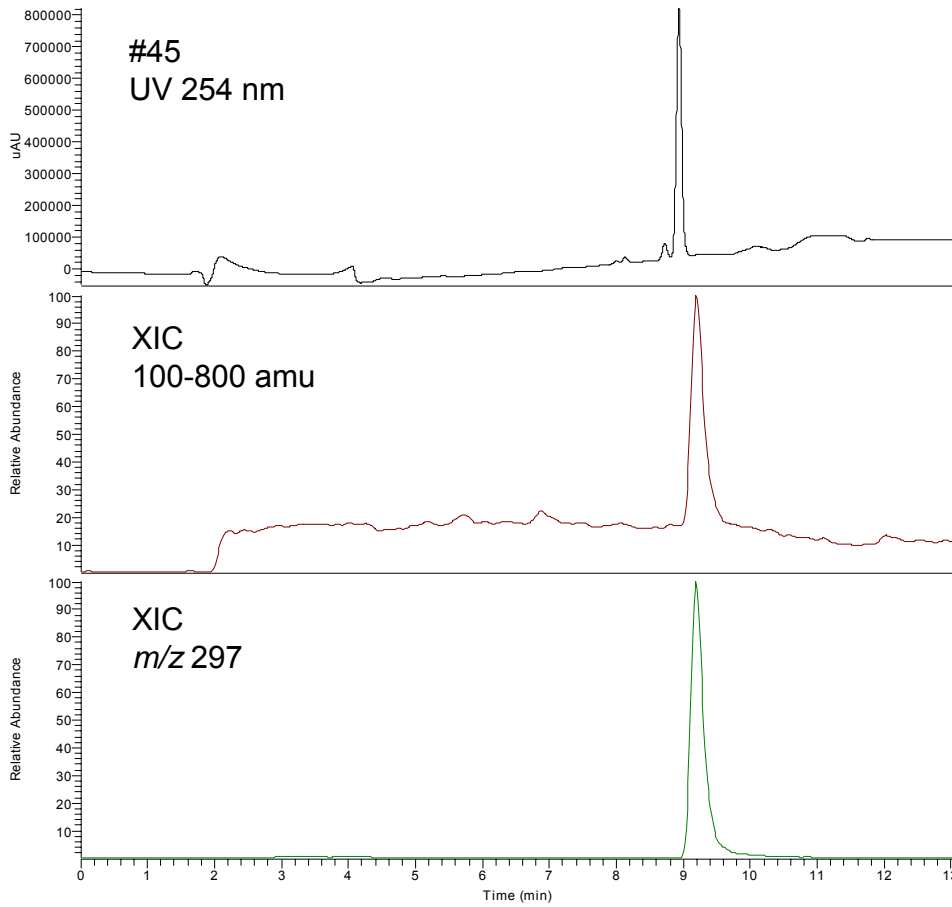

NL: 8.20E5  
Channel A UV  
08\_08\_2008\_UCSF\_PIS  
63\_080823042750

NL: 2.93E8  
 $m/z$ = 100.00-800.00 F: +  
p sid=-10.00 Q1MS [  
50.00-1200.00] MS  
08\_08\_2008\_UCSF\_PIS  
63\_080823042750

NL: 1.05E8  
 $m/z$ = 296.50-297.50 F: +  
p sid=-10.00 Q1MS [  
50.00-1200.00] MS  
08\_08\_2008\_UCSF\_PIS  
63\_080823042750

08\_08\_2008\_UCSF\_PIS63\_080822052209 #609-623 RT: 9.02-9.23 AV: 15 SB: 520 0.84-4.37, 5.87-10.02 SM: 15G NL: 5.50E6  
F: + p sid=-10.00 Full ms2 297.10@-30.00 [ 50.00-700.00]

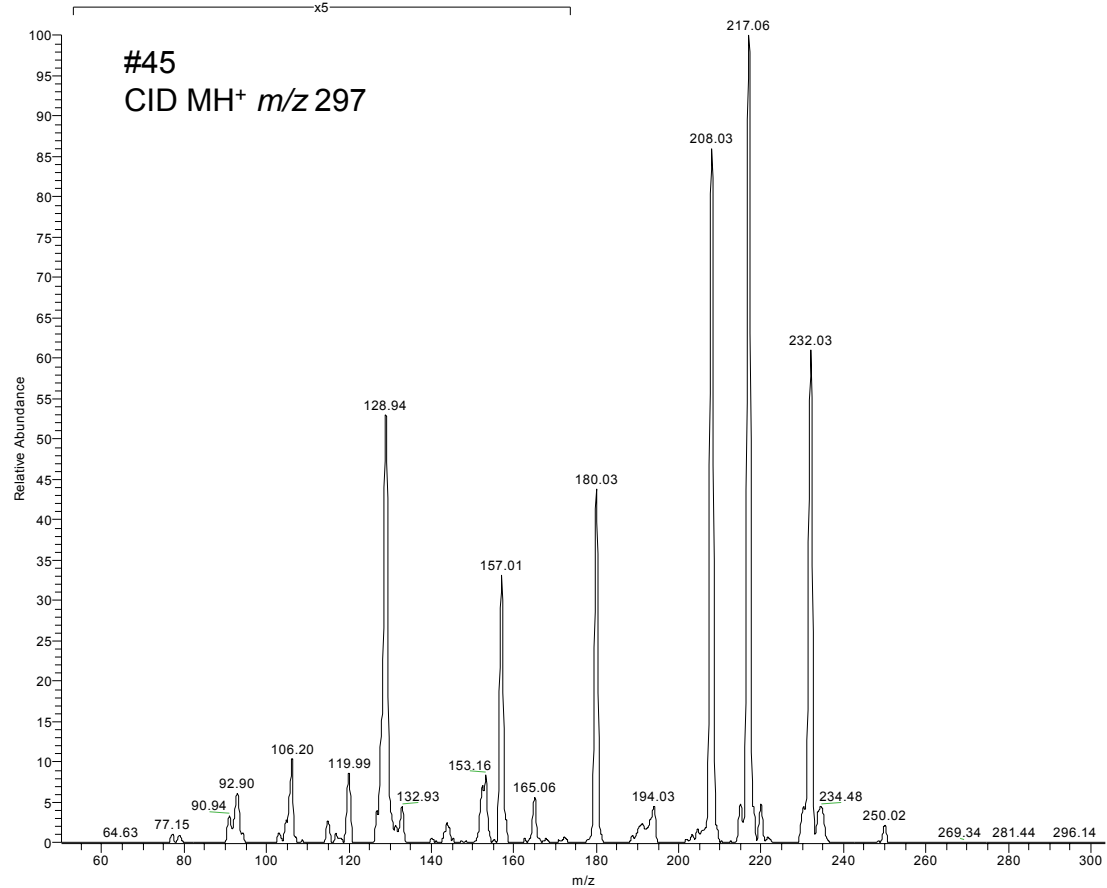

RT: 0.00 - 13.04 SM: 15G

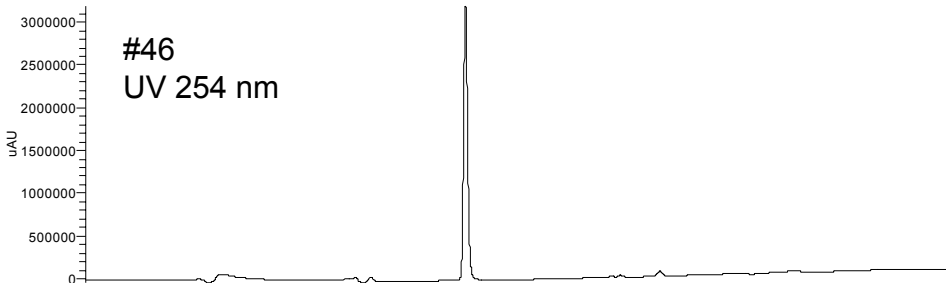

NL: 3.18E6  
Channel A UV  
08\_08\_2008\_UCSF\_PIS  
65\_080823050320

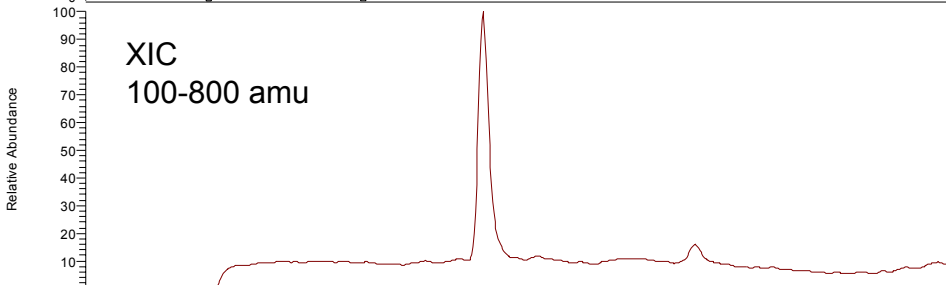

NL: 5.44E8  
m/z= 100.00-800.00 F: +  
p sid=-10.00 Q1MS [  
50.00-1200.00] MS  
08\_08\_2008\_UCSF\_PIS  
65\_080823050320

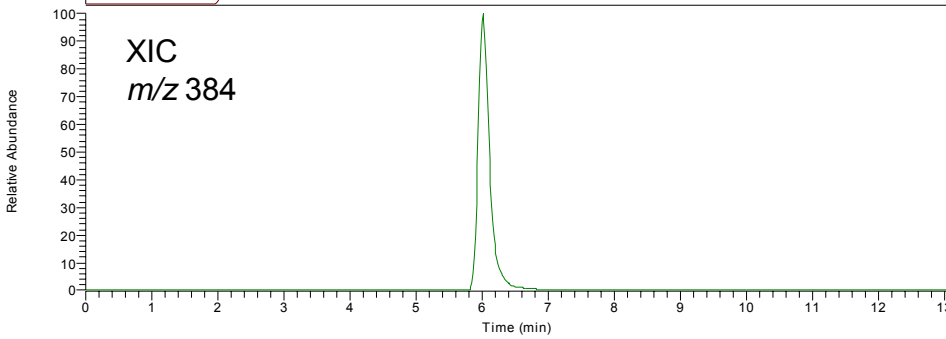

NL: 3.35E8  
m/z= 383.50-384.50 F: +  
p sid=-10.00 Q1MS [  
50.00-1200.00] MS  
08\_08\_2008\_UCSF\_PIS  
65\_080823050320

08\_08\_2008\_UCSF\_PIS65\_080822055742 #396-416 RT: 5.86-6.16 AV: 21 SB: 520 0.84-4.37, 5.86-10.02 SM: 15G NL: 2.10E7  
F: + p sid=-10.00 Full ms2 384.10@-30.00 [ 50.00-700.00]

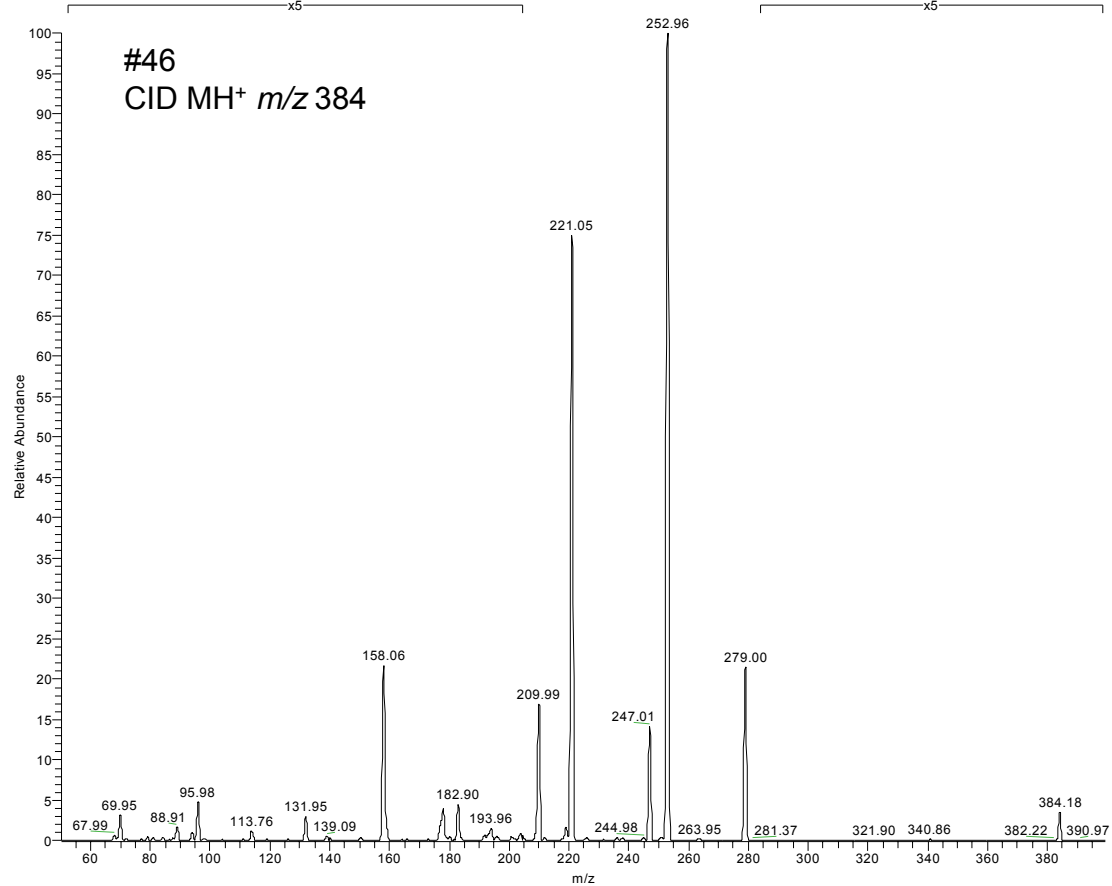

RT: 0.00 - 13.04 SM: 15G

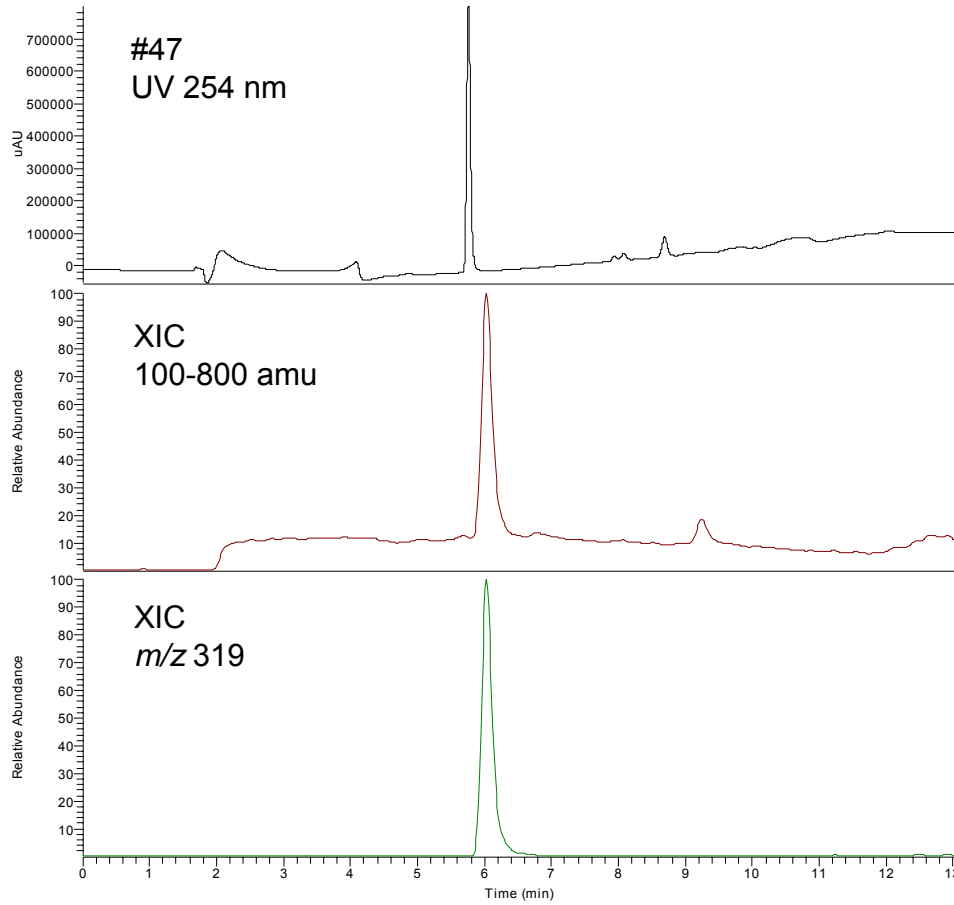

NL: 7.98E5  
Channel A UV  
08\_08\_2008\_UCSF\_PIS  
66\_080823052108

NL: 4.47E8  
 $m/z=$  100.00-800.00 F: +  
p sid=-10.00 Q1MS [  
50.00-1200.00] MS  
08\_08\_2008\_UCSF\_PIS  
66\_080823052108

NL: 2.53E8  
 $m/z=$  318.50-319.50 F: +  
p sid=-10.00 Q1MS [  
50.00-1200.00] MS  
08\_08\_2008\_UCSF\_PIS  
66\_080823052108

08\_08\_2008\_UCSF\_PIS66\_080823182301 #404-421 RT: 5.98-6.24 AV: 18 SB: 2 17.00, 17.00 SM: 15G NL: 6.51E6  
F: + p sid=-10.00 Full ms2 319.10@-30.00 [ 50.00-700.00]

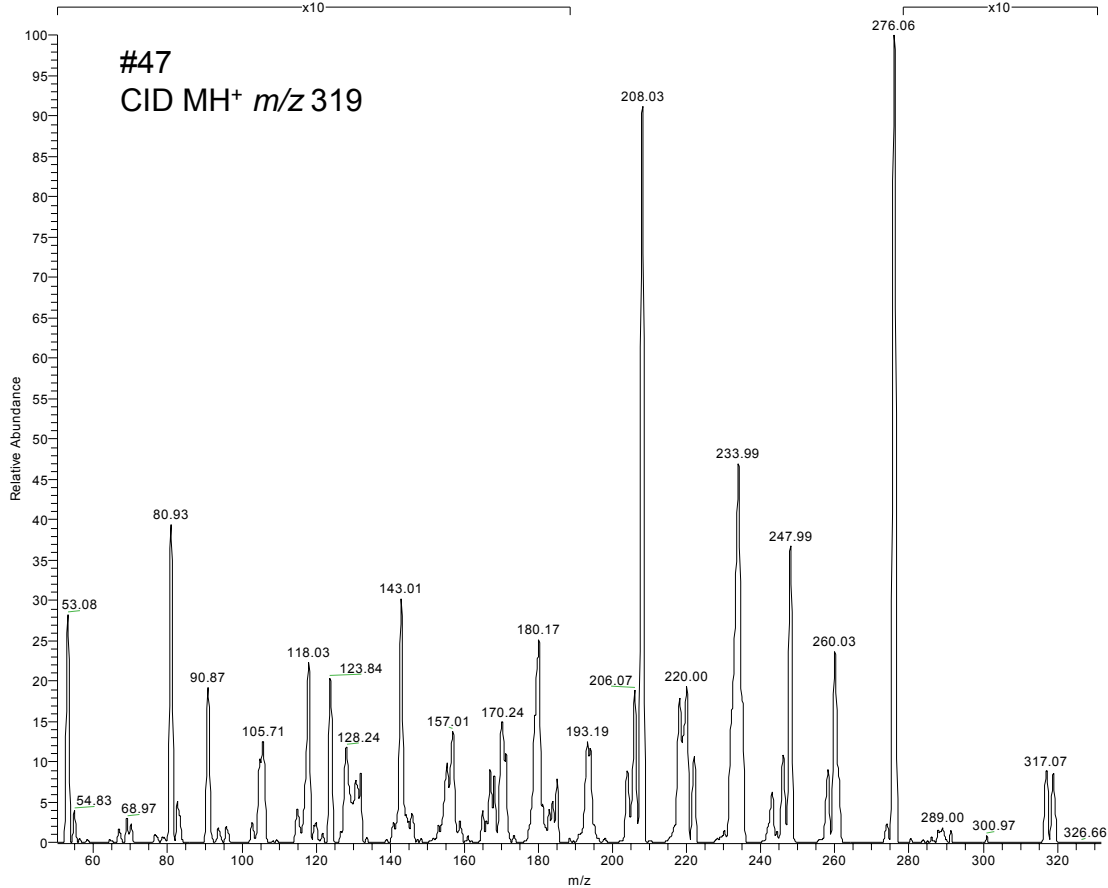

RT: 0.00 - 13.04 SM: 15G

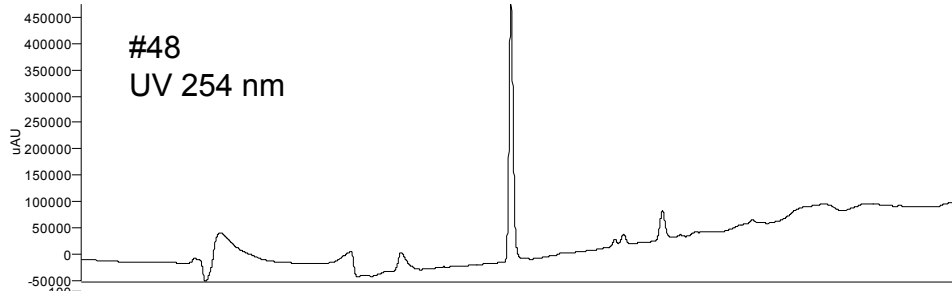

NL: 4.73E5  
Channel A UV  
08\_08\_2008\_UCSF\_PIS  
67\_080823053855

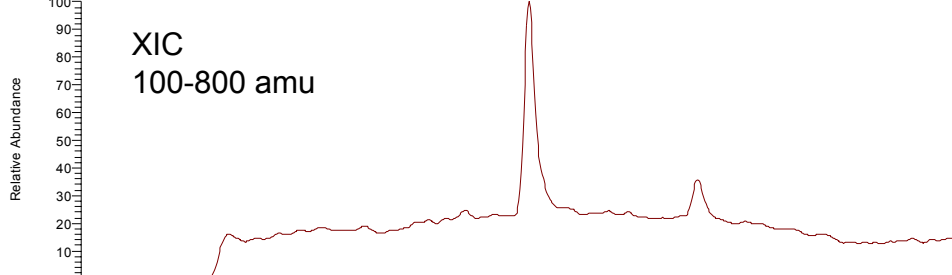

NL: 2.67E8  
m/z= 100.00-800.00 F: +  
p sid=-10.00 Q1MS [  
50.00-1200.00] MS  
08\_08\_2008\_UCSF\_PIS  
67\_080823053855

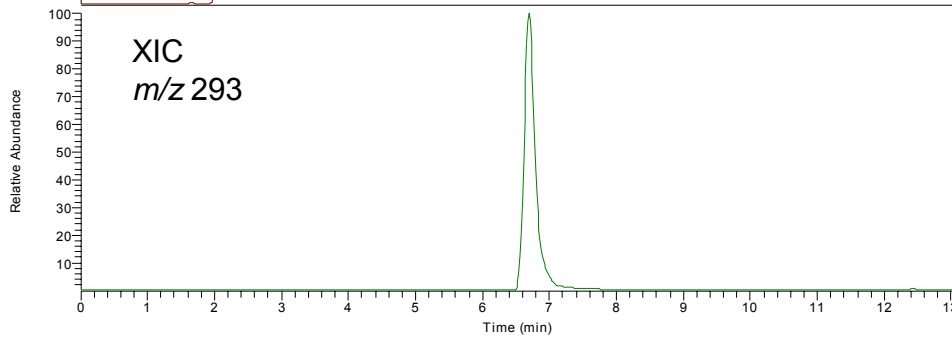

NL: 1.61E8  
m/z= 292.50-293.50 F: +  
p sid=-10.00 Q1MS [  
50.00-1200.00] MS  
08\_08\_2008\_UCSF\_PIS  
67\_080823053855

08\_08\_2008\_UCSF\_PIS67\_080822063314 #438-452 RT: 6.49-6.70 AV: 15 SB: 520 0.84-4.37, 5.86-10.02 SM: 15G NL: 5.75E6  
F: + p sid=-10.00 Full ms2 293.10@-30.00 [ 50.00-700.00]

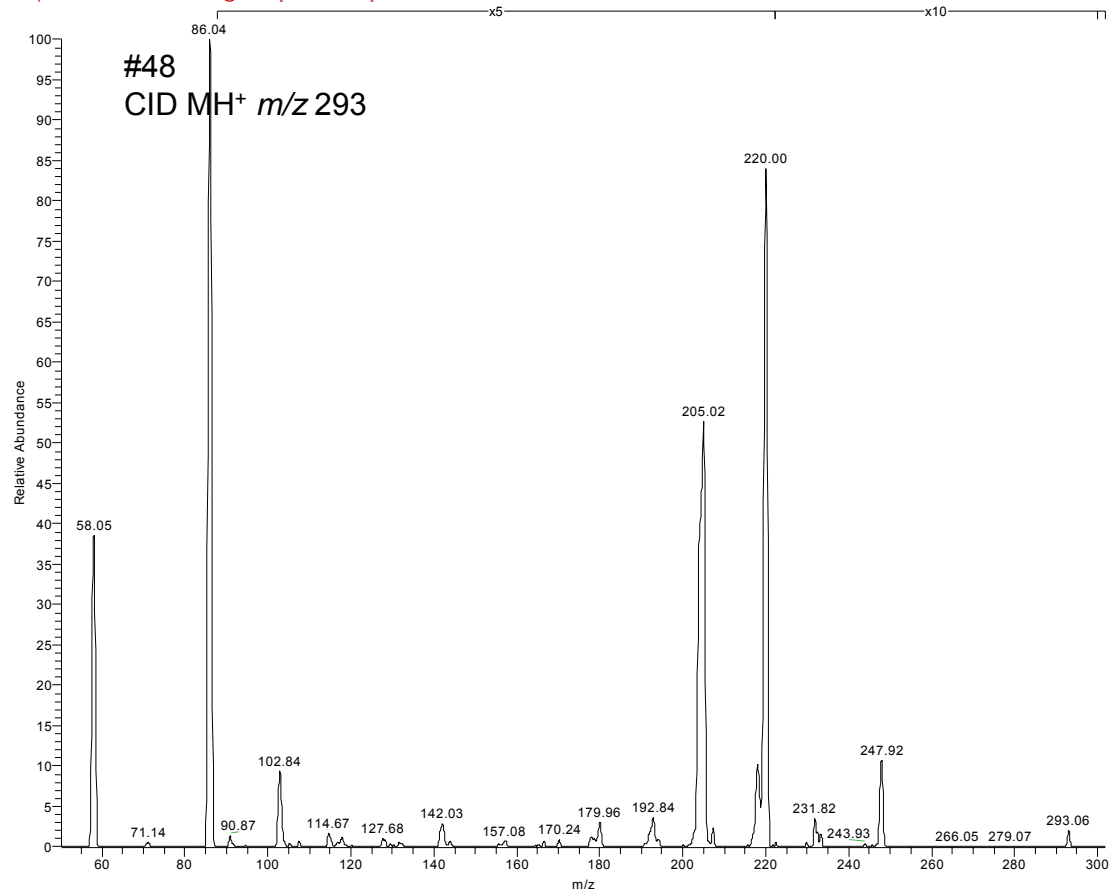

RT: 0.00 - 13.04 SM: 15G

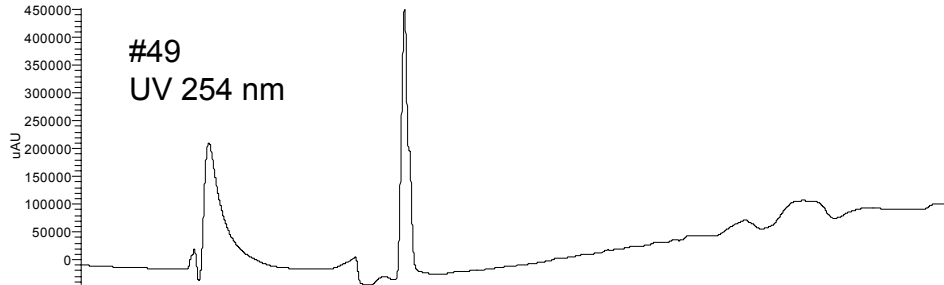

NL: 4.52E5  
Channel A UV  
08\_22\_2008\_UCSF\_PURI  
TY\_A23\_080824174059

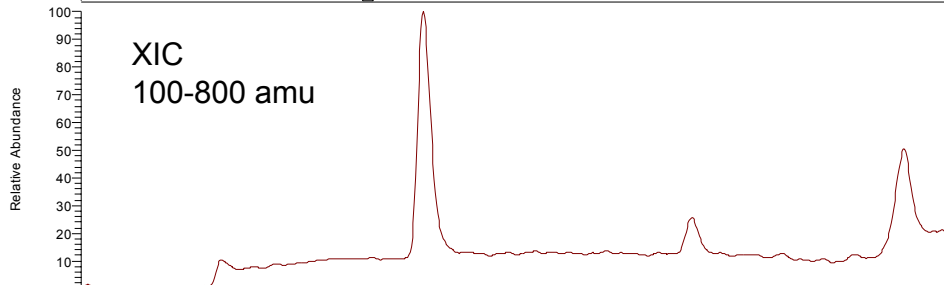

NL: 3.25E8  
m/z= 100.00-800.00 F: +  
p sd=-10.00 Q1MS [  
50.00-1200.00] MS  
08\_22\_2008\_UCSF\_PURI  
TY\_A23\_080824174059

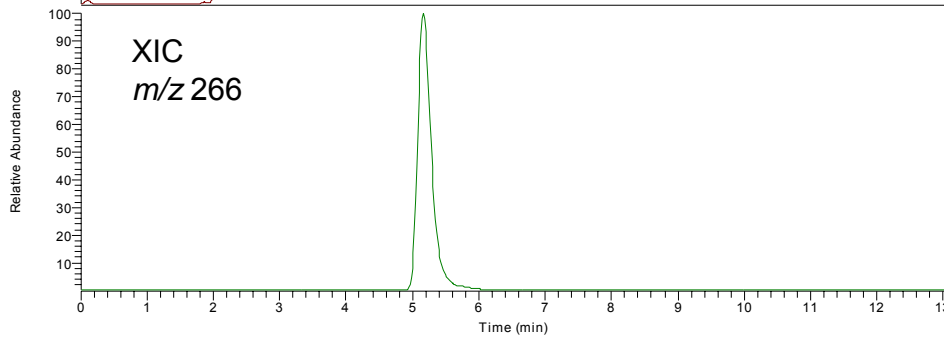

NL: 1.97E8  
m/z= 265.50-266.50 F: +  
p sd=-10.00 Q1MS [  
50.00-1200.00] MS  
08\_22\_2008\_UCSF\_PURI  
TY\_A23\_080824174059

08\_22\_2008\_UCSF\_PURITY\_A23\_080825004726 #338-358 RT: 5.01-5.30 AV: 21 SB: 2 0.01, 0.01 SM: 15G NL: 1.88E7  
F: + p sd=-10.00 Full ms2 266.10@-30.00 [ 50.00-700.00]

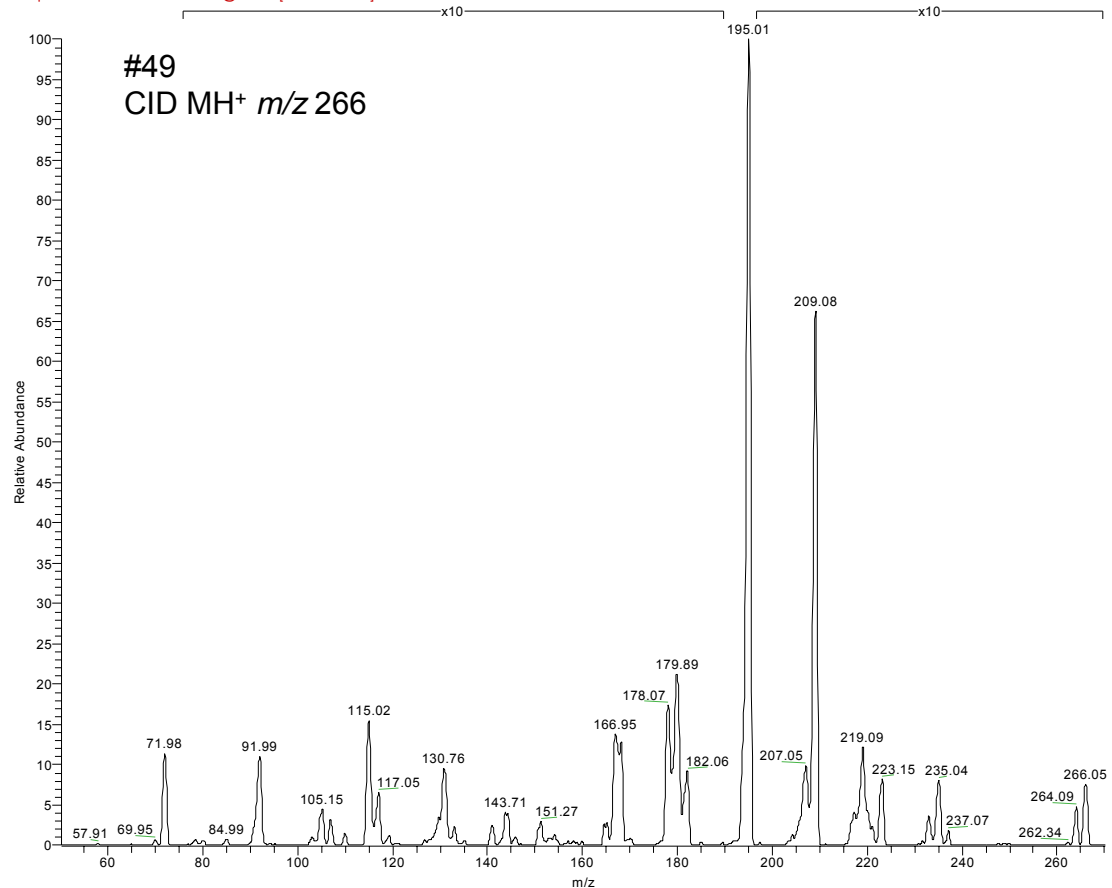

RT: 0.00 - 13.04 SM: 15G

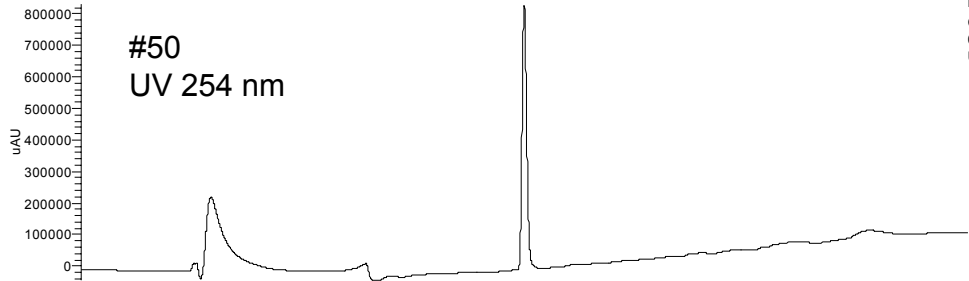

NL: 8.29E5  
Channel A UV  
08\_22\_2008\_UCSF\_P  
URITY\_A24

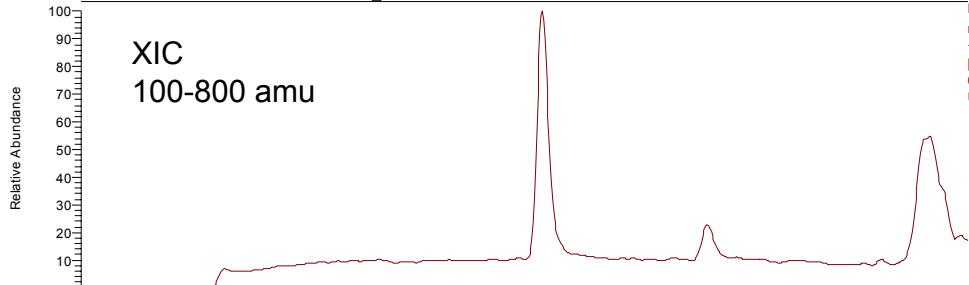

NL: 3.45E8  
m/z= 100.00-800.00 F:  
+ p sid=-10.00 Q1MS  
[ 50.00-1200.00] MS  
08\_22\_2008\_UCSF\_P  
URITY\_A24

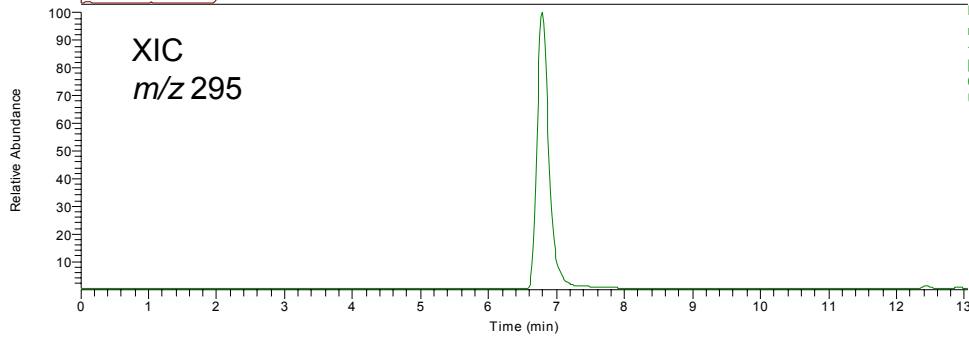

NL: 2.24E8  
m/z= 294.50-295.50 F:  
+ p sid=-10.00 Q1MS  
[ 50.00-1200.00] MS  
08\_22\_2008\_UCSF\_P  
URITY\_A24

08\_22\_2008\_UCSF\_PURITY\_A24\_080825010514 #444-469 RT: 6.58-6.95 AV: 26 SB: 2 0.01, 0.01 SM: 15G NL: 4.46E6  
F: + p sid=-10.00 Full m/z 295.20@-30.00 [ 50.00-700.00]

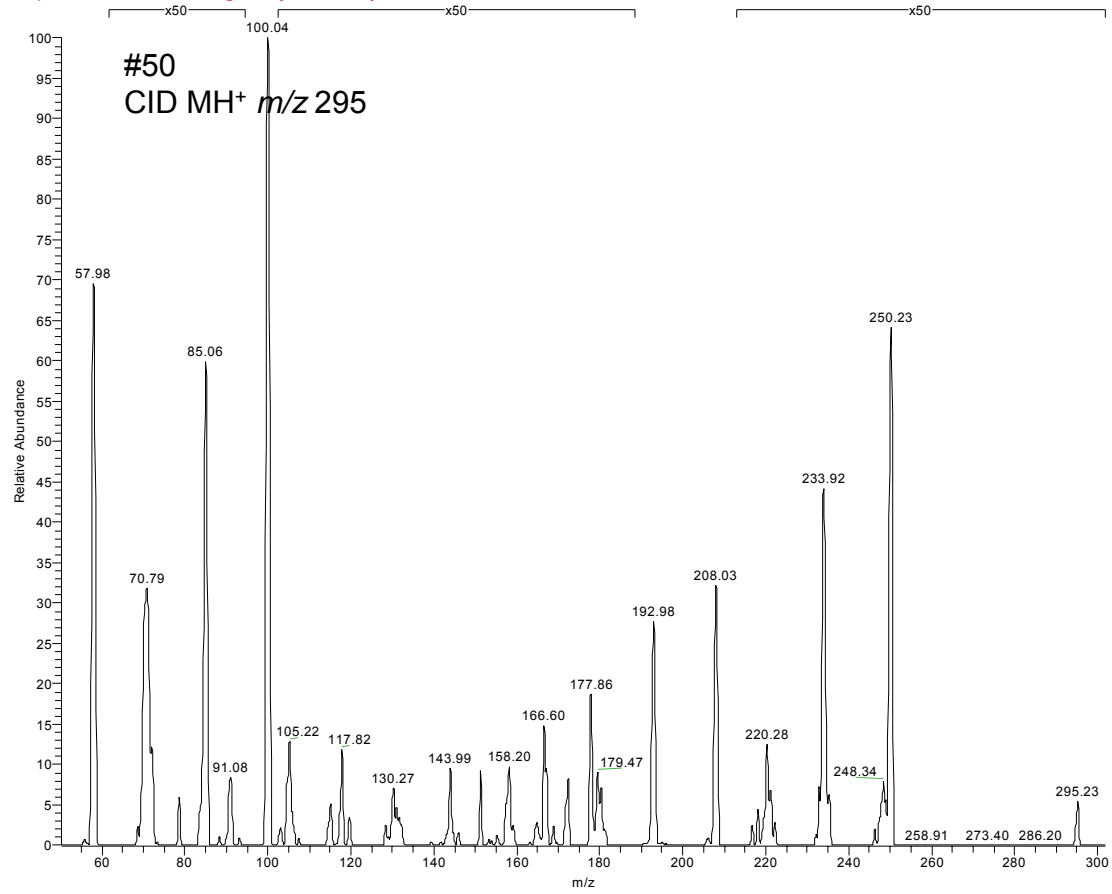



RT: 0.00 - 13.04 SM: 15G

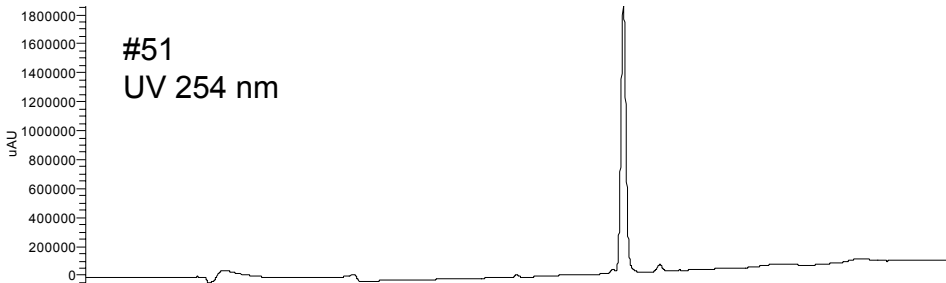

NL: 1.86E6  
Channel A UV  
08\_08\_2008\_UCSF\_PIS  
69\_080823061425

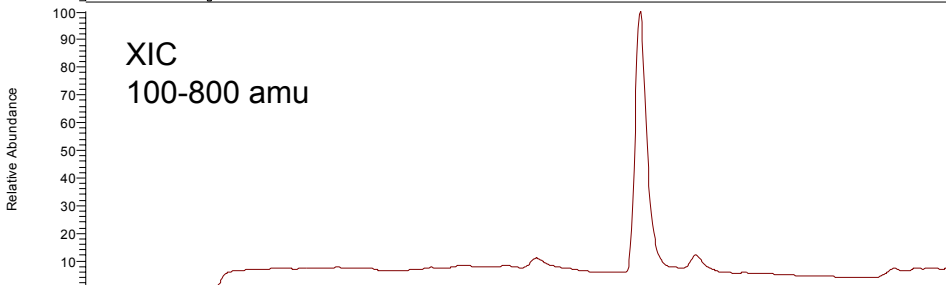

NL: 6.90E8  
m/z= 100.00-800.00 F: +  
p sid=-10.00 Q1MS [  
50.00-1200.00] MS  
08\_08\_2008\_UCSF\_PIS  
69\_080823061425

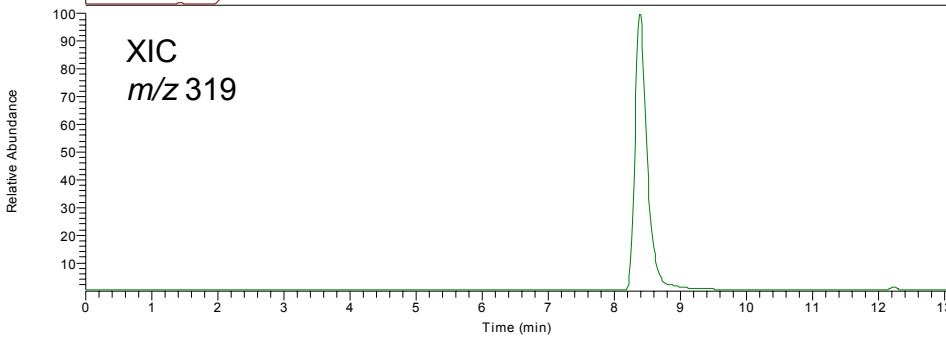

NL: 4.78E8  
m/z= 318.50-319.50 F: +  
p sid=-10.00 Q1MS [  
50.00-1200.00] MS  
08\_08\_2008\_UCSF\_PIS  
69\_080823061425

08\_08\_2008\_UCSF\_PIS69\_080822070847 #556-570 RT: 8.24-8.45 AV: 15 SB: 520 0.84-4.37, 5.87-10.02 SM: 15G NL: 5.28E7  
F: + p sid=-10.00 Full ms2 319.10@-30.00 [ 50.00-700.00]

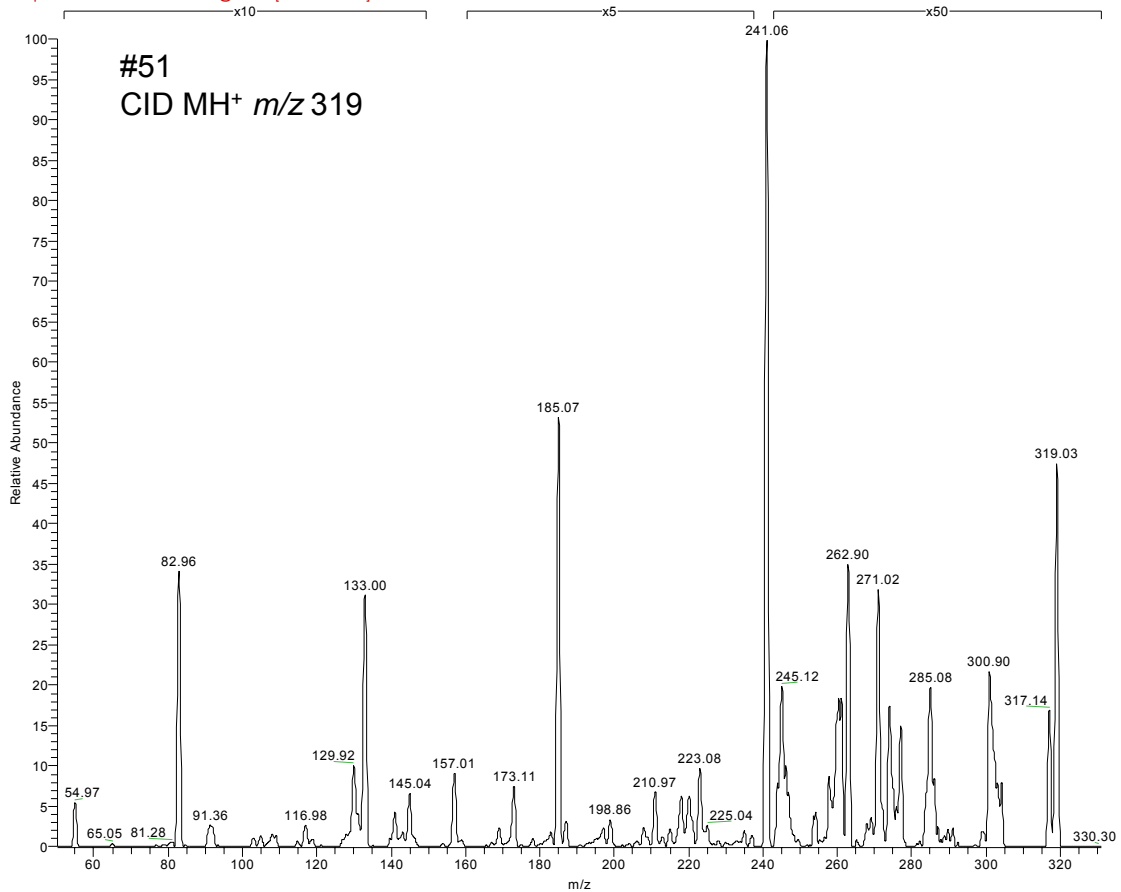

RT: 0.00 - 13.04 SM: 15G

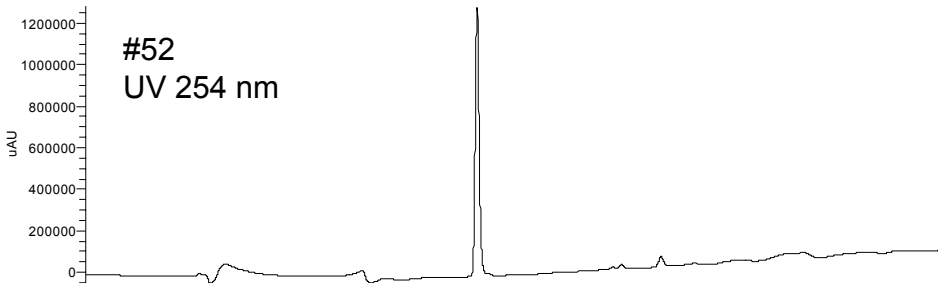

NL: 1.28E6  
Channel A UV  
08\_08\_2008\_UCSF\_PIS  
73\_080823063213

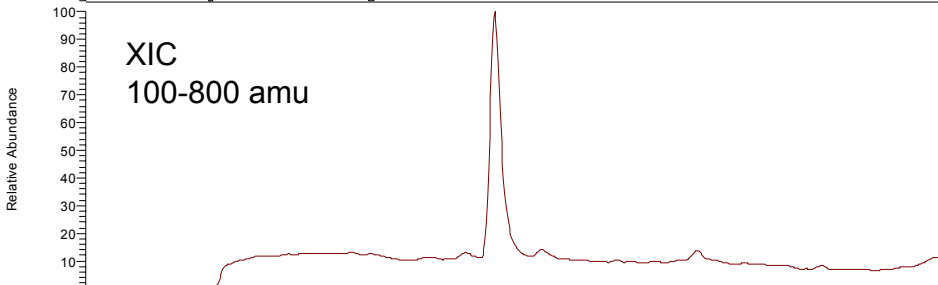

NL: 4.05E8  
m/z= 100.00-800.00 F: +  
p sid=-10.00 Q1MS [  
50.00-1200.00] MS  
08\_08\_2008\_UCSF\_PIS  
73\_080823063213

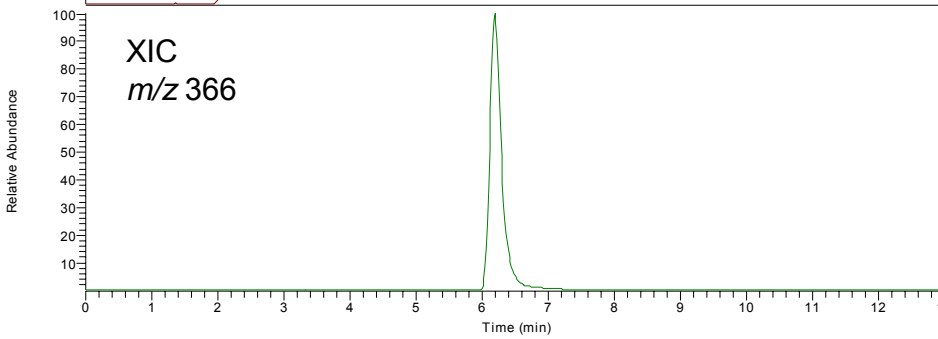

NL: 1.83E8  
m/z= 365.50-366.50 F: +  
p sid=-10.00 Q1MS [  
50.00-1200.00] MS  
08\_08\_2008\_UCSF\_PIS  
73\_080823063213

08\_08\_2008\_UCSF\_PIS73\_080822072629 #400-416 RT: 5.92-6.16 AV: 17 SB: 520 0.84-4.37, 5.86-10.01 SM: 15G NL: 8.85E6  
F: + p sid=-10.00 Full ms2 366.10@-30.00 [ 50.00-700.00]

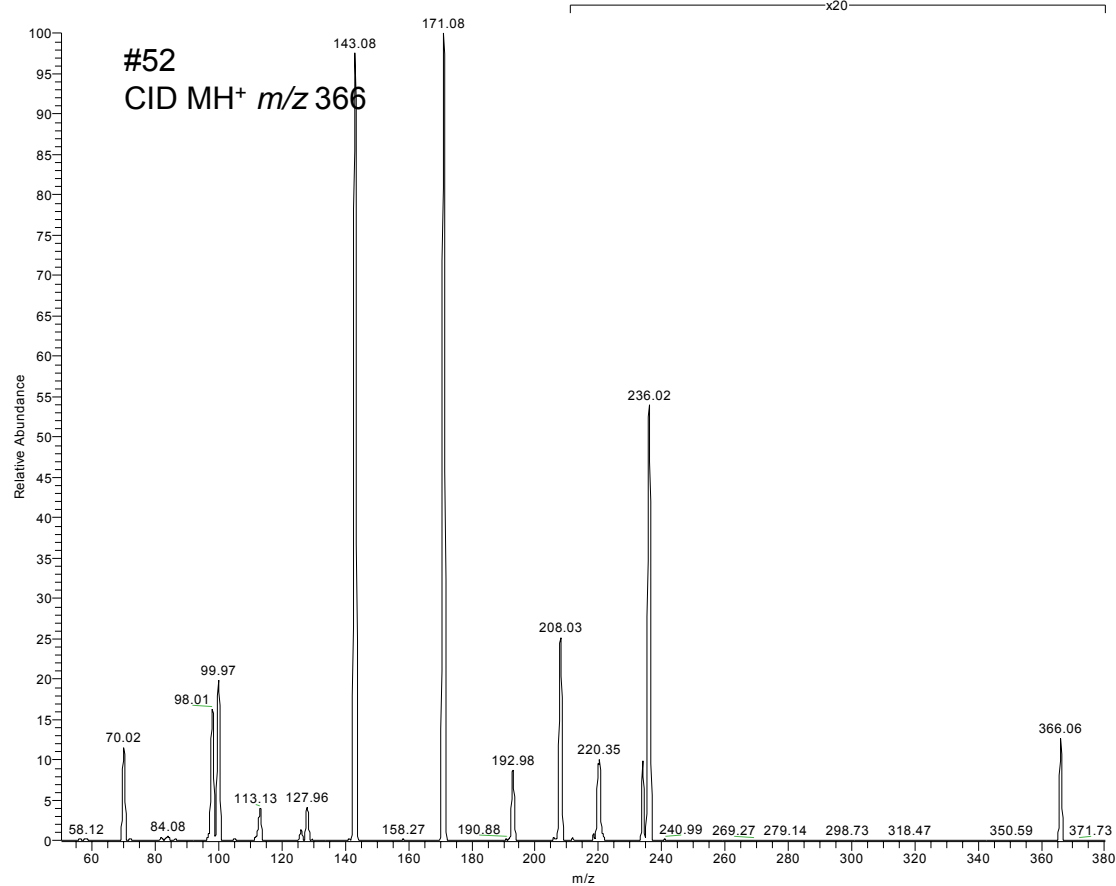

RT: 0.00 - 13.04 SM: 15G

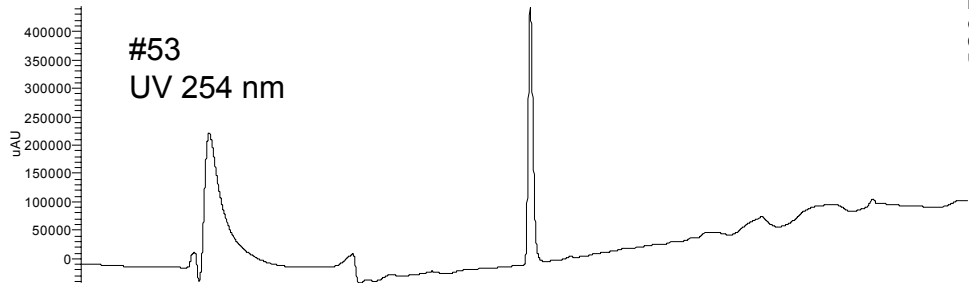

NL: 4.44E5  
Channel A\_UV  
08\_22\_2008\_UCSF\_P  
URITY\_A25

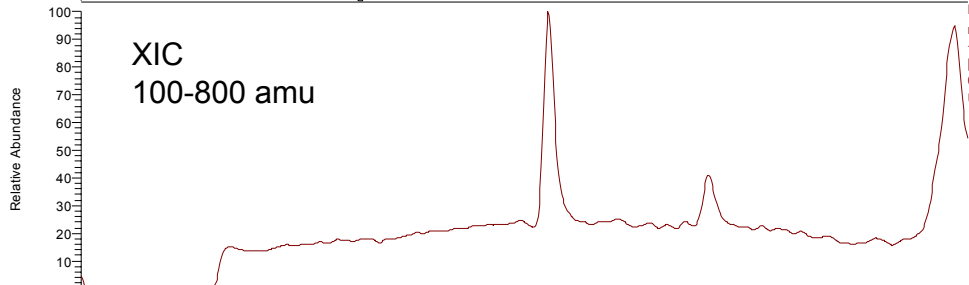

NL: 2.10E8  
m/z= 100.00-800.00 F:  
+ p sd=-10.00 Q1MS  
[ 50.00-1200.00] MS  
08\_22\_2008\_UCSF\_P  
URITY\_A25

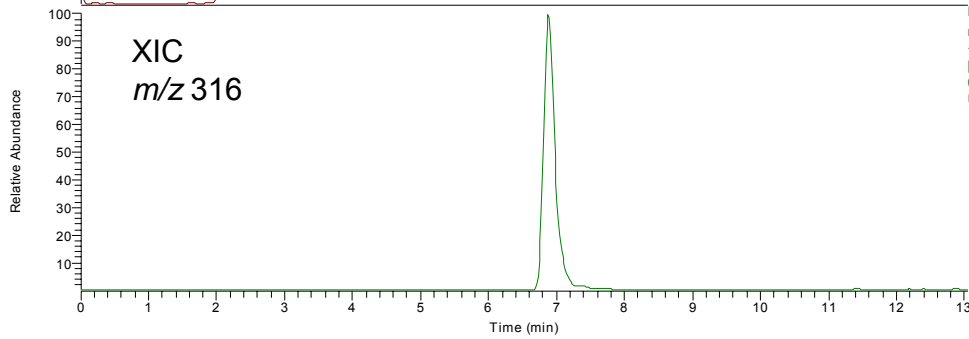

NL: 8.78E7  
m/z= 315.50-316.50 F:  
+ p sd=-10.00 Q1MS  
[ 50.00-1200.00] MS  
08\_22\_2008\_UCSF\_P  
URITY\_A25

08\_22\_2008\_UCSF\_PURITY\_A25\_080825012302 #453-476 RT: 6.71-7.05 AV: 24 SB: 2 0.01 , 0.01 SM: 15G NL: 2.78E6  
F: + p sd=-10.00 Full m/z 316.10@-30.00 [ 50.00-700.00]

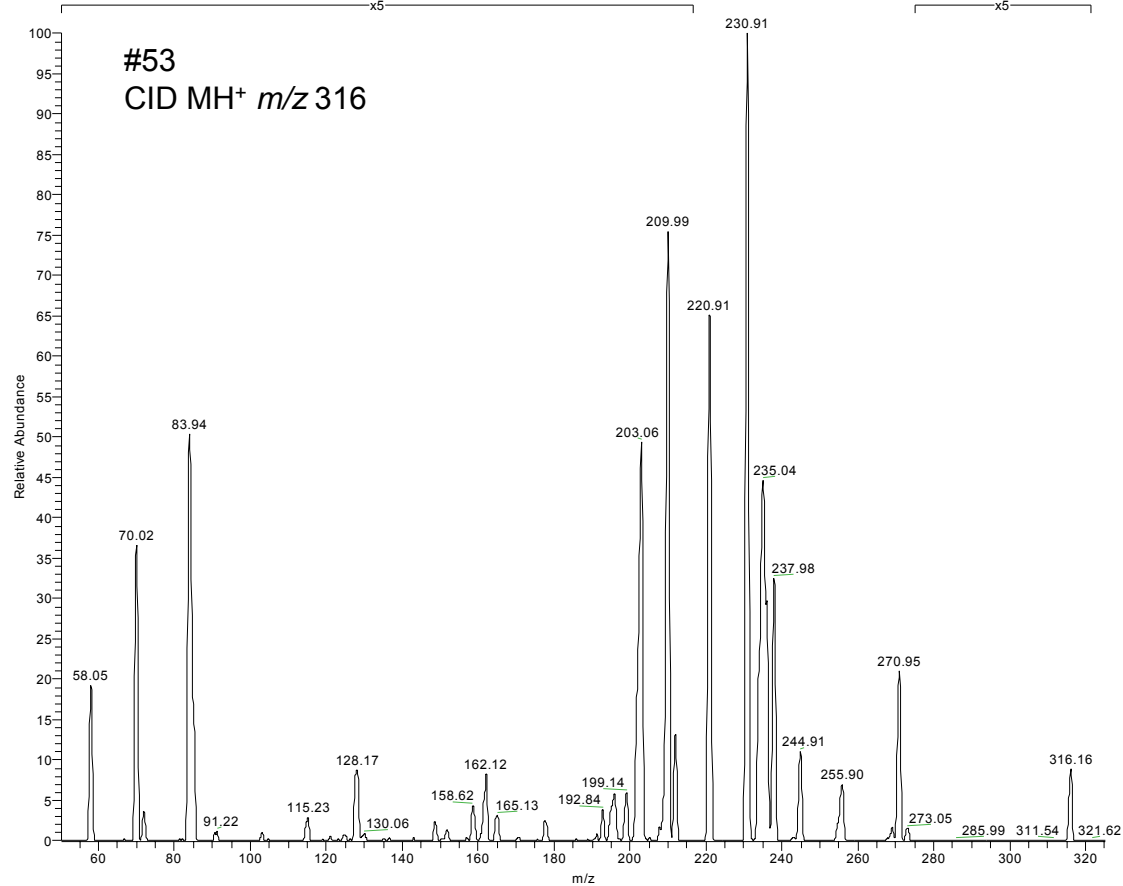

RT: 0.00 - 13.04 SM: 15G

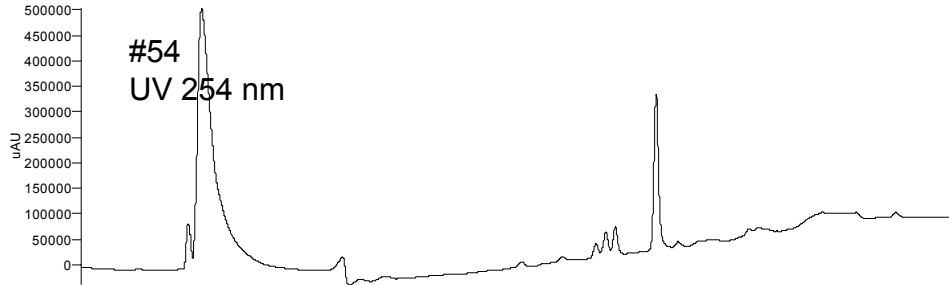

NL: 5.02E5  
Channel A UV  
08\_08\_2008\_UCSF\_PIS  
75\_080814101059

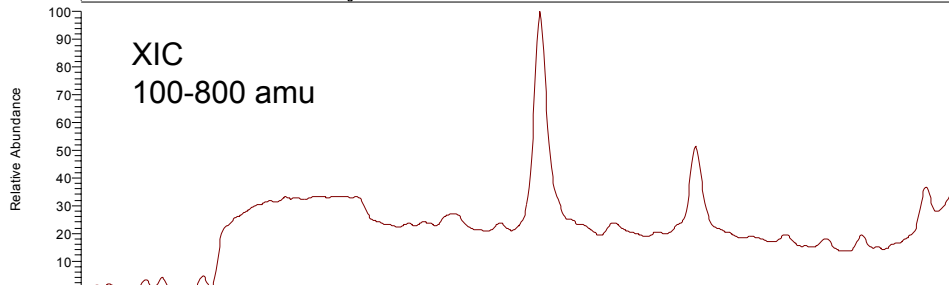

NL: 2.20E8  
m/z= 100.00-800.00 F: +  
p sid=-10.00 Q1MS [  
50.00-1200.00] MS  
08\_08\_2008\_UCSF\_PIS  
75\_080814101059

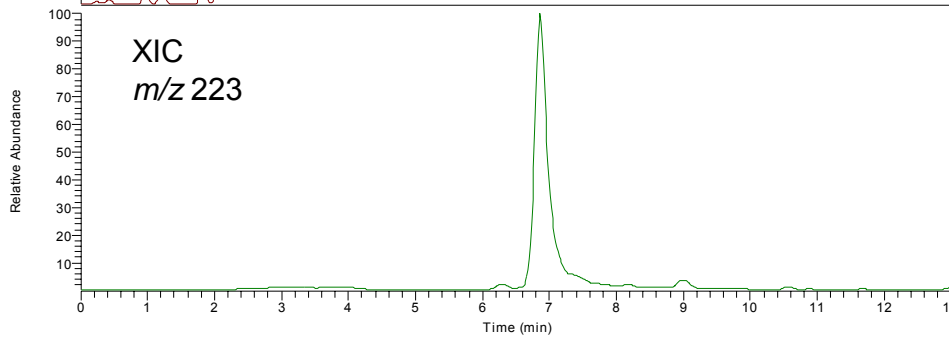

NL: 9.37E7  
m/z= 222.50-223.50 F: +  
p sid=-10.00 Q1MS [  
50.00-1200.00] MS  
08\_08\_2008\_UCSF\_PIS  
75\_080814101059

08\_08\_2008\_UCSF\_PIS75\_080822080205 #464-483 RT: 6.87-7.16 AV: 20 SB: 520 0.84-4.37, 5.87-10.02 SM: 15G NL: 1.76E5  
F: + p sid=-10.00 Full ms2 223.10@-30.00 [ 50.00-700.00]

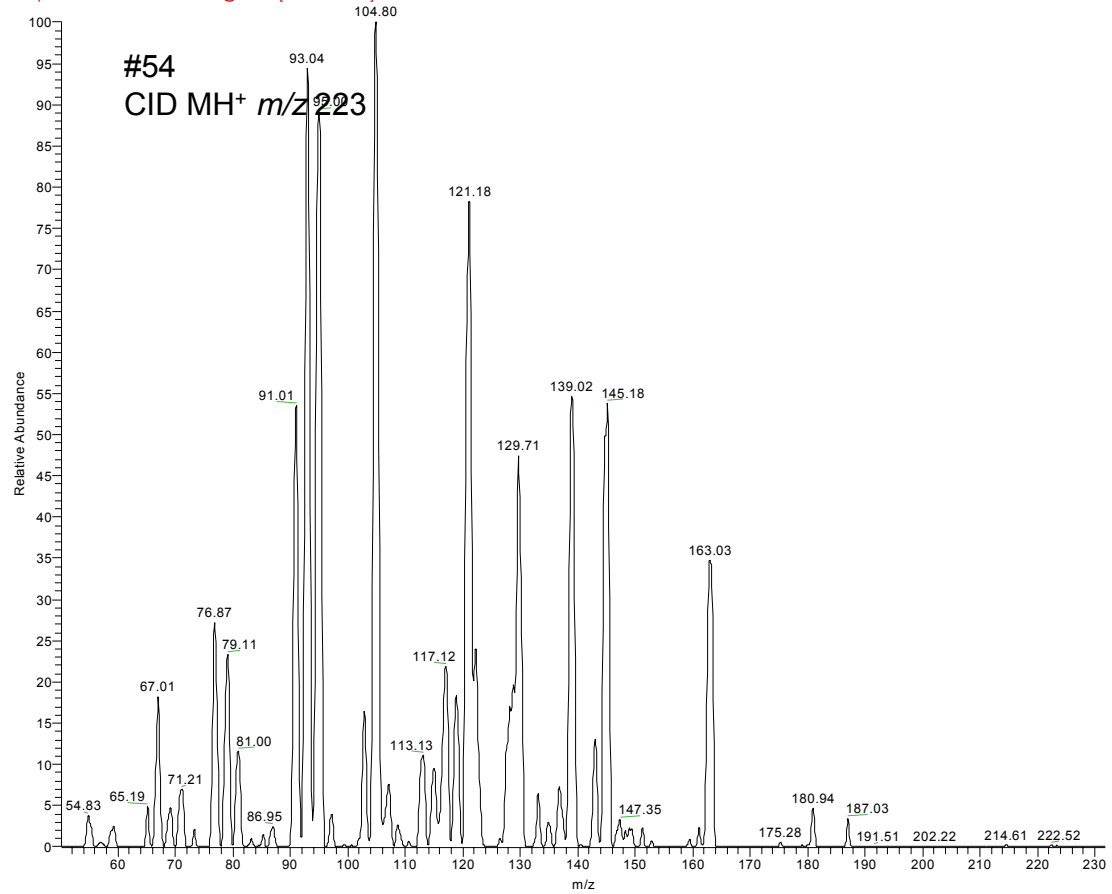

RT: 0.00 - 13.04 SM: 15G

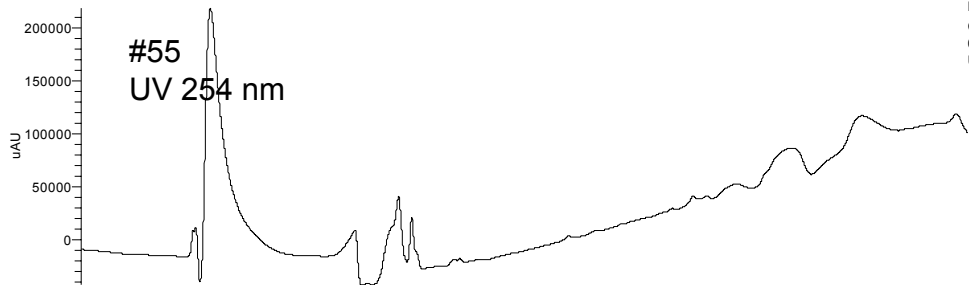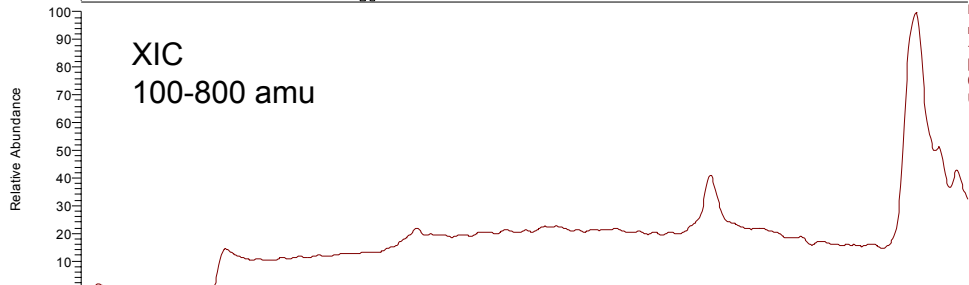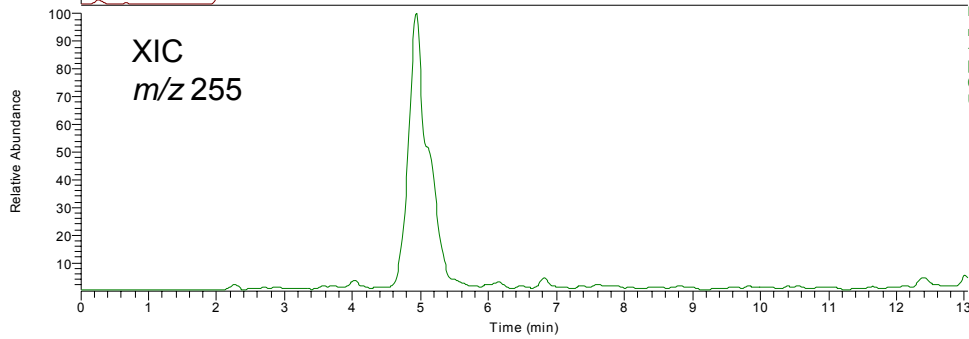

08\_22\_2008\_UCSF\_PURITY\_A28\_080825114636 #321-340 RT: 4.75-5.03 AV: 20 SB: 2 17.00, 17.00 SM: 15G NL: 3.72E5  
F: + p sd=-10.00 Full ms2 255.10@-30.00 [ 50.00-700.00]

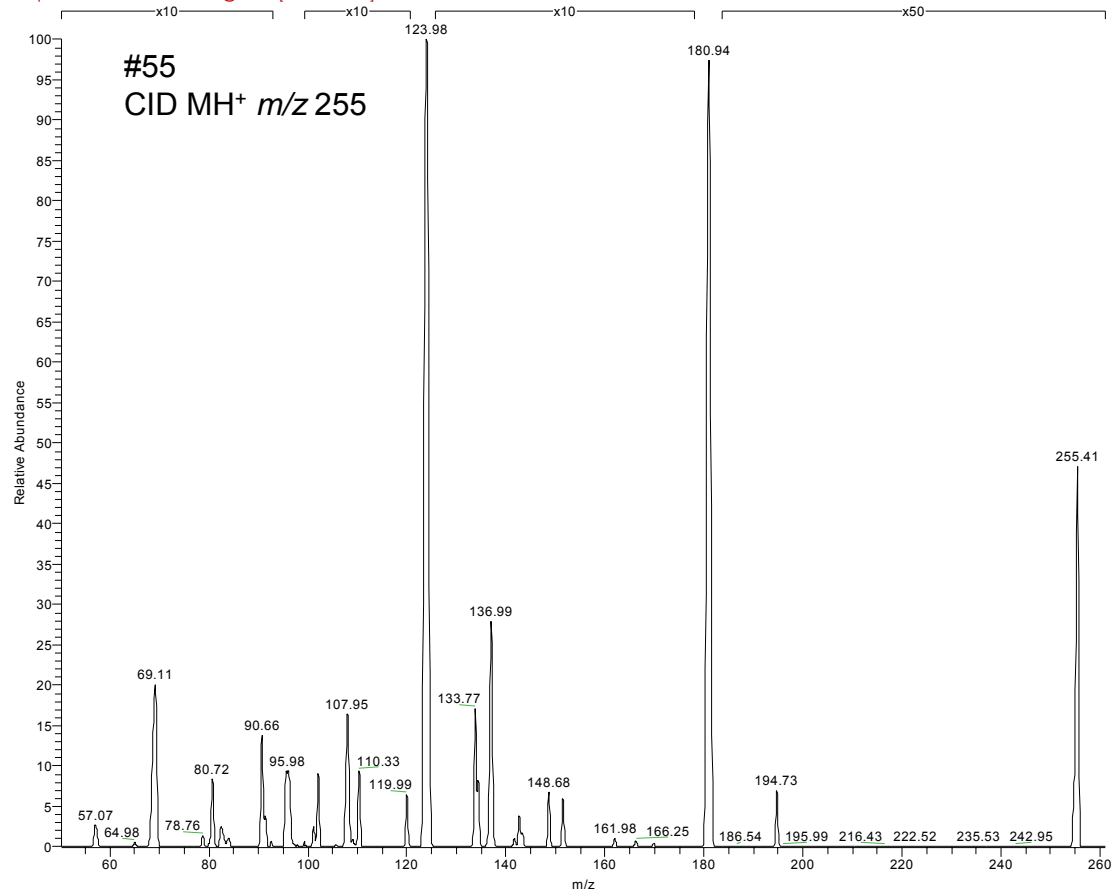

RT: 0.00 - 13.04 SM: 15G

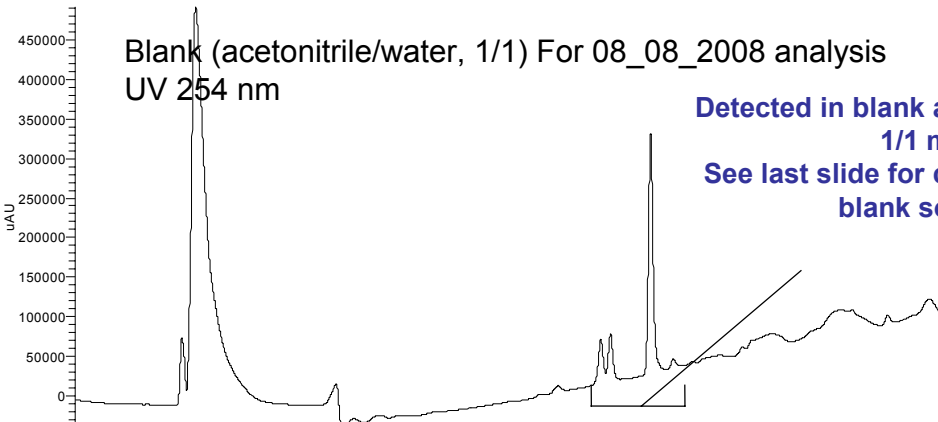

Blank (acetonitrile/water, 1/1) For 08\_08\_2008 analysis  
UV 254 nm

NL: 4.91E5  
Channel A UV  
08\_08\_2008\_UCSF\_PIS  
77\_080814104636

Detected in blank acetonitrile/water,  
1/1 mix;  
See last slide for chromatogram of  
blank solution

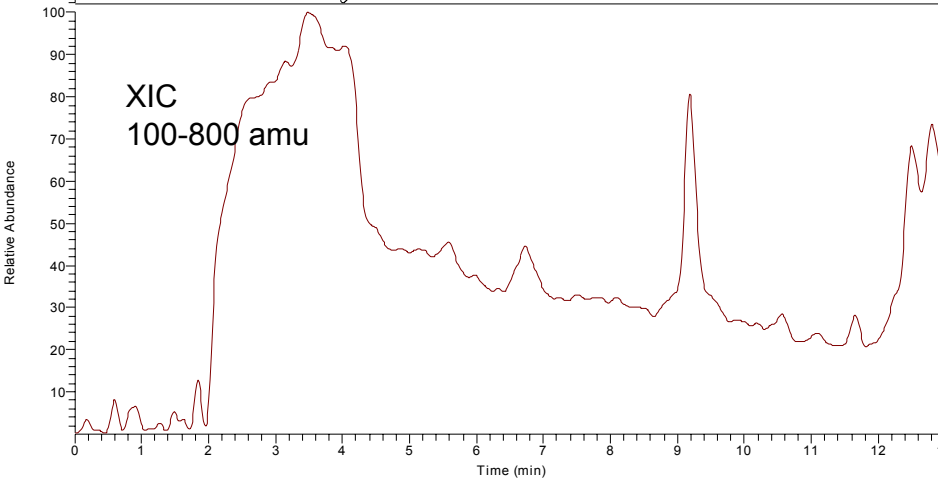

XIC  
100-800 amu

NL: 1.70E8  
m/z= 100.00-800.00 F: +  
p sid=-10.00 Q1MS [  
50.00-1200.00] MS  
08\_08\_2008\_UCSF\_PIS  
77\_080814104636

RT: 0.00 - 13.04 SM: 15G

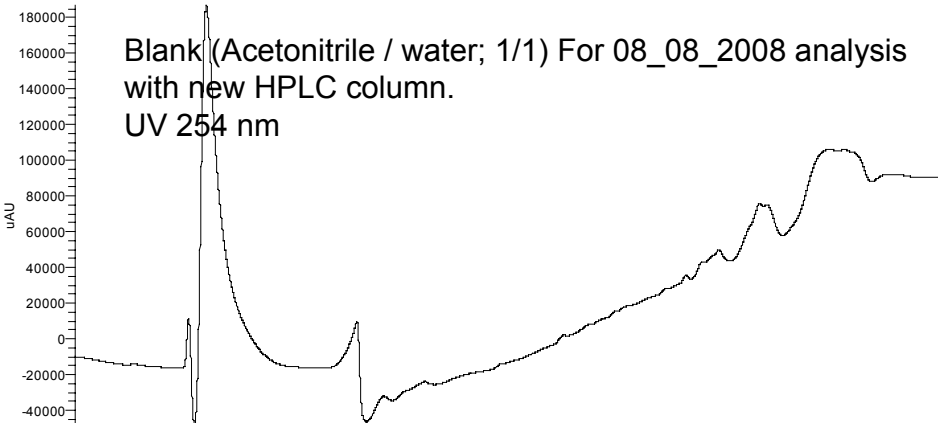

Blank (Acetonitrile / water; 1/1) For 08\_08\_2008 analysis  
with new HPLC column.  
UV 254 nm

NL: 1.86E5  
Channel A UV  
08\_22\_2008\_UCSF\_P  
URITY\_A30

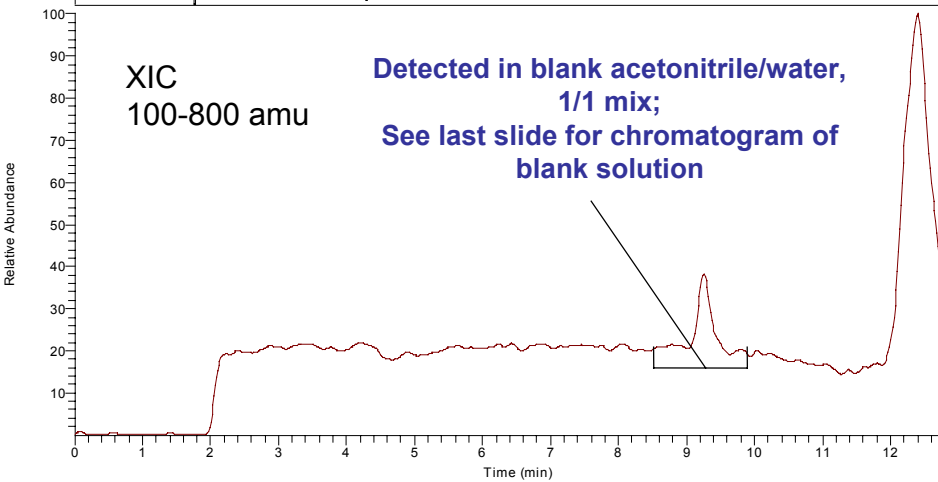

XIC  
100-800 amu

Detected in blank acetonitrile/water,  
1/1 mix;  
See last slide for chromatogram of  
blank solution

NL: 2.05E8  
m/z= 100.00-800.00 F:  
+ p sid=-10.00 Q1MS  
[ 50.00-1200.00] MS  
08\_22\_2008\_UCSF\_P  
URITY\_A30
